# Supplementary material for: IBTK Differently Modulates Gene Expression and RNA Splicing in HeLa and K562 Cells
Source: Int J Mol Sci. 2016 Nov 7;17(11):1848. doi: 10.3390/ijms17111848 (PMC5133848; doi:10.3390/ijms17111848)
Supplement: Supplementary file 1 [file ijms-17-01848-s001.zip › ijms-144583-Supplementary Materials/ijms-144583-Supple-Table S1-S5 .xlsx]

## Sheet: Table S1
Gene ID	Fold Change (HELA_SHI vs HELA_SHC)	Regulation	p-value	Gene Symbol
ENSG00000264159	10.7585	up	3.04701e-09	RN7SL866P
ENSG00000260412	10.2206	up	3.75255e-14	RP11-438B23.2
ENSG00000073282	8.95222	up	2.39586e-13	TP63
ENSG00000104814	8.12815	up	1.48798e-05	MAP4K1
ENSG00000187475	7.6724	up	1.07687e-11	HIST1H1T
ENSG00000272689	7.23207	up	7.01294e-06	RP4-539M6.21
ENSG00000271788	6.28039	up	3.65634e-05	CTD-2201E18.5
ENSG00000146047	6.02684	up	5.44571e-06	HIST1H2BA
ENSG00000272428	5.41439	up	0.000100621	RP11-704J17.5
ENSG00000235786	5.38691	up	0.000744329	ZNRF3-IT1
ENSG00000253731	5.27337	up	0.000719344	PCDHGA6
ENSG00000207359	4.99835	up	0.00023925	RNU6-925P
ENSG00000110693	4.91486	up	0.000620537	SOX6
ENSG00000182533	4.90364	up	0.000269483	CAV3
ENSG00000272515	4.90008	up	0.00010195	RP11-29P20.1
ENSG00000267798	4.81875	up	0.00106661	RP11-333J10.3
ENSG00000236242	4.80153	up	0.00138903	MYO16-AS1
ENSG00000259242	4.79276	up	0.000844806	AC002306.1
ENSG00000139155	4.77048	up	3.93278e-06	SLCO1C1
ENSG00000270956	4.75515	up	0.000518671	RP11-65L3.4
ENSG00000259955	4.72132	up	0.000680829	CTD-2547G23.2
ENSG00000270127	4.63252	up	0.000122855	RP11-526I2.5
ENSG00000229010	4.52772	up	0.000634766	RP5-979D14.1
ENSG00000249328	4.50737	up	0.00478684	RP11-26J3.1
ENSG00000234796	4.47254	up	0.00254278	AC113607.3
ENSG00000166401	4.43578	up	9.04768e-05	SERPINB8
ENSG00000228444	4.43462	up	0.000692835	RP11-173B14.4
ENSG00000272844	4.41818	up	0.00577756	RP11-484K9.4
ENSG00000087589	4.39965	up	0.000849738	CASS4
ENSG00000226609	4.33764	up	0.00041979	RP11-276E15.4
ENSG00000164741	4.33563	up	1.83233e-07	DLC1
ENSG00000271966	4.32475	up	0.00010195	RP11-7F18.2
ENSG00000267547	4.28071	up	0.00450342	RP11-686D22.4
ENSG00000100867	4.27766	up	1.26146e-05	DHRS2
ENSG00000239494	4.22464	up	0.00474798	RN7SL333P
ENSG00000225264	4.22284	up	0.00242992	ZNRF2P2
ENSG00000196666	4.21129	up	0.00450304	FAM180B
ENSG00000135205	4.20569	up	0.00265711	CCDC146
ENSG00000261229	4.194	up	0.00117443	RP11-38G5.4
ENSG00000237774	4.18905	up	0.00240981	RP11-129B9.1
ENSG00000267033	4.18884	up	0.000688901	CTD-2562J15.4
ENSG00000272791	4.16745	up	0.00010689	RP11-464F9.22
ENSG00000272761	4.16266	up	0.00168329	RP11-572C15.6
ENSG00000189280	4.14647	up	4.99769e-05	GJB5
ENSG00000125637	4.1455	up	0.000644637	PSD4
ENSG00000225857	4.13599	up	0.0011885	RP11-46A10.2
ENSG00000152049	4.12519	up	0.00235968	KCNE4
ENSG00000256204	4.10574	up	0.00115514	RP11-243M5.1
ENSG00000272914	4.04493	up	0.000485483	RP11-330O11.3
ENSG00000264608	4.03936	up	0.00254078	RP11-192H23.8
ENSG00000272733	4.02114	up	0.000656107	KB-208E9.1
ENSG00000260931	4.01923	up	0.00244337	RP11-65L3.1
ENSG00000179913	3.99118	up	0.00702883	B3GNT3
ENSG00000256576	3.97184	up	0.000709273	RP13-977J11.2
ENSG00000156265	3.9404	up	0.000607254	MAP3K7CL
ENSG00000243244	3.86884	up	0.000629707	STON1
ENSG00000220305	3.83105	up	0.0050427	HNRNPH1P1
ENSG00000261528	3.82096	up	7.27082e-06	AC002400.1
ENSG00000236917	3.81893	up	0.00142379	DNAJA1P2
ENSG00000270880	3.81875	up	0.00274083	RP11-255E6.5
ENSG00000226786	3.79791	up	0.00655943	RP1-167F1.2
ENSG00000250980	3.7707	up	0.00678455	RP11-529H22.1
ENSG00000267242	3.73093	up	0.000210514	AC069278.4
ENSG00000271009	3.72284	up	0.00184487	RP11-346C20.3
ENSG00000124215	3.71966	up	0.00383461	CDH26
ENSG00000259103	3.71713	up	0.0110138	RP11-270M14.4
ENSG00000269125	3.7	up	0.00260855	RP11-98F14.11
ENSG00000205181	3.65022	up	0.00140265	LINC00654
ENSG00000272250	3.62362	up	0.00189302	RP11-346C20.4
ENSG00000245281	3.62328	up	0.0027127	CTD-2547L16.1
ENSG00000269481	3.58046	up	0.000886995	CTD-2521M24.6
ENSG00000019102	3.57227	up	0.00581825	VSIG2
ENSG00000168939	3.56544	up	0.00146308	SPRY3
ENSG00000170500	3.56381	up	1.19143e-10	LONRF2
ENSG00000155530	3.55845	up	0.00571968	LRGUK
ENSG00000223714	3.55103	up	0.00220494	RP5-1172N10.2
ENSG00000213272	3.53357	up	0.000485483	RP11-613M5.1
ENSG00000136011	3.5233	up	0.00115246	STAB2
ENSG00000258565	3.5212	up	0.00279322	BLZF2P
ENSG00000261135	3.50158	up	0.000772399	RP4-798A10.7
ENSG00000253537	3.4919	up	0.0114603	PCDHGA7
ENSG00000260582	3.48789	up	0.00624916	TPST2P1
ENSG00000221887	3.47537	up	0.0105754	HMSD
ENSG00000076344	3.46508	up	0.00489037	RGS11
ENSG00000253550	3.46101	up	0.0071341	RP11-115C21.4
ENSG00000188910	3.45745	up	0.000936978	GJB3
ENSG00000231384	3.4553	up	0.00850991	AC007919.19
ENSG00000236483	3.43551	up	0.0102182	CTD-3105H18.8
ENSG00000197083	3.42584	up	0.000387323	ZNF300P1
ENSG00000220506	3.41263	up	0.00815447	RP3-415N12.1
ENSG00000222627	3.40001	up	0.00848706	RNU2-37P
ENSG00000261737	3.37575	up	0.00624916	RP4-612B15.3
ENSG00000235258	3.34721	up	0.00613806	AC115115.3
ENSG00000132517	3.31979	up	0.00792193	SLC52A1
ENSG00000255296	3.3136	up	0.0103363	RP11-757C15.4
ENSG00000273007	3.29821	up	0.00267784	RP11-170N16.3
ENSG00000167483	3.29379	up	0.00815424	FAM129C
ENSG00000213171	3.27813	up	0.00645448	LINGO4
ENSG00000141293	3.27487	up	0.00272462	SKAP1
ENSG00000232987	3.274	up	0.00932915	AC051649.6
ENSG00000223401	3.26381	up	0.00601361	RP11-211G3.2
ENSG00000175946	3.25393	up	0.00541354	KLHL38
ENSG00000184486	3.25284	up	0.0088732	POU3F2
ENSG00000227413	3.24248	up	0.0092824	RP5-1042K10.12
ENSG00000244378	3.24166	up	0.00276171	RPS2P45
ENSG00000169621	3.21621	up	9.39135e-07	APLF
ENSG00000273356	3.20053	up	7.73942e-08	RP11-804H8.6
ENSG00000271029	3.19661	up	0.00262844	RP11-849F2.10
ENSG00000272755	3.19572	up	0.00413088	RP11-326G21.1
ENSG00000225880	3.19189	up	5.08718e-05	LINC00115
ENSG00000246379	3.18667	up	0.00900367	RP11-461O7.1
ENSG00000259994	3.17089	up	0	RP11-305E6.4
ENSG00000267082	3.17078	up	0.0101408	CTC-510F12.2
ENSG00000234610	3.16174	up	0.00115011	LINC00624
ENSG00000234181	3.15827	up	0.00747304	RP11-182N22.8
ENSG00000136237	3.15615	up	0.000816776	RAPGEF5
ENSG00000245322	3.13677	up	0.0116518	RP11-15B17.1
ENSG00000231595	3.12582	up	0.000955194	AC005224.2
ENSG00000273261	3.12398	up	0.00252739	RP11-531F16.4
ENSG00000242474	3.12283	up	0.00127661	AC093627.9
ENSG00000114670	3.11271	up	4.45977e-06	NEK11
ENSG00000203262	3.1061	up	0.0016118	RP5-961K14.2
ENSG00000271734	3.09217	up	0.00770714	RP1-111B22.3
ENSG00000215317	3.08686	up	0.00231185	THUMPD1P1
ENSG00000224637	3.08501	up	0.00174613	AC019129.2
ENSG00000169403	3.0818	up	0.0081234	PTAFR
ENSG00000132357	3.05422	up	0.000418766	CARD6
ENSG00000155760	3.04333	up	2.16286e-10	FZD7
ENSG00000201643	3.03658	up	0.00422082	SNORA14A
ENSG00000185532	3.03503	up	0.00924894	PRKG1
ENSG00000148483	3.03421	up	0.00735332	TMEM236
ENSG00000261787	3.01312	up	0.0032665	TCF24
ENSG00000273281	3.00821	up	0.000421083	RP11-339B21.14
ENSG00000271553	2.99993	up	0.00304745	RP11-274B21.10
ENSG00000171385	2.96359	up	3.63594e-10	KCND3
ENSG00000198945	2.95106	up	0.0123705	L3MBTL3
ENSG00000235018	2.92912	up	0.0109559	RP11-11M20.2
ENSG00000266237	2.92496	up	0.00786053	RP11-25D3.1
ENSG00000260743	2.91994	up	9.97909e-10	RP11-255C15.3
ENSG00000263307	2.91812	up	0.00958498	RP11-166B2.8
ENSG00000220739	2.90844	up	0.0108725	RP11-277I20.3
ENSG00000203721	2.90832	up	3.48865e-05	LINC00862
ENSG00000265361	2.90497	up	0.00191781	RN7SL867P
ENSG00000227946	2.89693	up	0.00656651	AC007383.3
ENSG00000187678	2.88995	up	6.86702e-10	SPRY4
ENSG00000139780	2.88893	up	0.00368219	METTL21C
ENSG00000204311	2.88363	up	0.000116684	DFNB59
ENSG00000163053	2.88305	up	0.00485002	SLC16A14
ENSG00000204113	2.86898	up	0.00834498	BMP2KL
ENSG00000268947	2.84054	up	0.00114854	AD000684.2
ENSG00000187715	2.8191	up	0.0083635	KBTBD12
ENSG00000253756	2.81539	up	0.0069019	RP11-192P9.1
ENSG00000236398	2.8046	up	0.0027003	TAS2R39
ENSG00000196532	2.80223	up	0.00243269	HIST1H3C
ENSG00000256134	2.79789	up	0.0123016	RP11-674J14.3
ENSG00000254207	2.79469	up	0.00365707	RP11-43A14.1
ENSG00000141753	2.77733	up	2.42864e-05	IGFBP4
ENSG00000174715	2.7758	up	0.010968	RP11-79L9.2
ENSG00000267552	2.77137	up	0.00514735	CTD-2528L19.4
ENSG00000224566	2.75988	up	0.0107311	FAM96AP2
ENSG00000137434	2.74429	up	0.00226607	C6orf52
ENSG00000268912	2.74275	up	2.88101e-08	CTD-2619J13.17
ENSG00000187513	2.71694	up	0.000835846	GJA4
ENSG00000212123	2.70994	up	0.00737013	PRR22
ENSG00000081041	2.70498	up	8.17707e-05	CXCL2
ENSG00000234043	2.70387	up	0.00313806	RP11-56M3.1
ENSG00000260790	2.70131	up	0.0048419	RP11-21M24.2
ENSG00000253311	2.69662	up	0.00231185	AC011343.1
ENSG00000255129	2.69109	up	0.00287798	RP11-839D17.3
ENSG00000256433	2.67609	up	2.77409e-07	RP1-102E24.8
ENSG00000224618	2.65031	up	0.0115453	AC096921.2
ENSG00000230479	2.64549	up	0.003702	AP000695.6
ENSG00000272334	2.63984	up	0.00735112	RP11-129K12.1
ENSG00000253848	2.63655	up	0.00452156	RP11-10N23.5
ENSG00000242958	2.62811	up	0.00730097	RP11-662B19.1
ENSG00000271334	2.62695	up	0.00422242	CTD-2078B5.2
ENSG00000213638	2.62547	up	0.000211016	ADAT3
ENSG00000231672	2.5922	up	0.0100029	DIRC3
ENSG00000145949	2.58046	up	8.92479e-07	MYLK4
ENSG00000039068	2.58003	up	0.000362563	CDH1
ENSG00000248698	2.56895	up	0.00837212	LINC01085
ENSG00000229789	2.56744	up	4.25093e-05	RP11-391M20.1
ENSG00000171956	2.55958	up	0.000260021	FOXB1
ENSG00000267578	2.53891	up	0.0098146	AC015849.12
ENSG00000123999	2.52595	up	0.00927952	INHA
ENSG00000102003	2.52189	up	0.00553795	SYP
ENSG00000222594	2.52125	up	0.00513095	RN7SKP235
ENSG00000226413	2.51428	up	0.0065436	OR8T1P
ENSG00000268225	2.51343	up	0.000125374	CTD-2331H12.5
ENSG00000182177	2.51247	up	0.00891552	ASB18
ENSG00000257271	2.50647	up	0.00957345	KIRREL3-AS1
ENSG00000270562	2.50183	up	0.00380585	RP11-154H23.3
ENSG00000214309	2.49989	up	0.000385391	MBLAC1
ENSG00000252763	2.4842	up	0.00993468	RNU2-31P
ENSG00000253526	2.47924	up	0.00536546	RP11-152P17.3
ENSG00000232915	2.47736	up	0.0110687	AC097721.1
ENSG00000233818	2.47191	up	0.000798547	AP000695.4
ENSG00000110944	2.46659	up	0.00438759	IL23A
ENSG00000259884	2.45946	up	7.31532e-07	RP11-1100L3.8
ENSG00000273181	2.45531	up	0.011176	RP11-778D9.13
ENSG00000254463	2.45032	up	0.00132716	RP11-484D2.3
ENSG00000180316	2.45004	up	0.0110089	PNPLA1
ENSG00000137869	2.45004	up	0.0065436	CYP19A1
ENSG00000266926	2.45004	up	0.0110089	AC005943.4
ENSG00000271329	2.42577	up	3.98384e-08	RP5-891H21.5
ENSG00000185291	2.42503	up	0.00258978	IL3RA
ENSG00000153790	2.41648	up	0.000707352	C7orf31
ENSG00000104888	2.41369	up	0.0117889	SLC17A7
ENSG00000251026	2.40408	up	0.00254887	RP11-138J23.1
ENSG00000146090	2.40379	up	6.42171e-05	RASGEF1C
ENSG00000268001	2.39453	up	0.000282302	CTC-241F20.3
ENSG00000269202	2.39176	up	0.00938604	RP4-614O4.12
ENSG00000224903	2.39132	up	0.00124966	AC005534.8
ENSG00000163009	2.38541	up	2.82951e-09	C2orf48
ENSG00000271200	2.38528	up	0.00470026	RP11-430G17.3
ENSG00000196569	2.38429	up	6.8566e-05	LAMA2
ENSG00000221539	2.3745	up	0.0028483	SNORD99
ENSG00000196226	2.35748	up	2.03852e-07	HIST1H2BB
ENSG00000250698	2.35509	up	0.00436943	RP11-392B6.1
ENSG00000251563	2.33614	up	0.000287688	AF121898.1
ENSG00000132141	2.32627	up	0.00134383	CCT6B
ENSG00000138356	2.31589	up	0.00184204	AOX1
ENSG00000171931	2.29619	up	3.39659e-06	FBXW10
ENSG00000245468	2.28928	up	0.0116286	RP11-367J11.3
ENSG00000257410	2.28867	up	0.000117572	RP11-2H8.2
ENSG00000255000	2.28853	up	0.00388945	AC139103.1
ENSG00000183496	2.28507	up	3.09704e-05	MEX3B
ENSG00000271096	2.2789	up	0.00363188	CTA-298G8.1
ENSG00000152475	2.27064	up	0.00285039	ZNF837
ENSG00000166845	2.25896	up	0	C18orf54
ENSG00000271367	2.25584	up	0.00388945	RP3-483K16.4
ENSG00000260418	2.24846	up	5.64986e-07	RP3-406A7.7
ENSG00000152377	2.24468	up	7.69829e-12	SPOCK1
ENSG00000116741	2.22727	up	0	RGS2
ENSG00000267580	2.22176	up	0.0023199	CTD-2540B15.11
ENSG00000267232	2.21266	up	0.00556466	CTB-31O20.9
ENSG00000163293	2.19868	up	1.1727e-06	NIPAL1
ENSG00000205838	2.19095	up	0.00217395	TTC23L
ENSG00000120738	2.18987	up	0	EGR1
ENSG00000236998	2.18458	up	0.000191589	RP11-203L2.3
ENSG00000272828	2.18306	up	0.0119951	CTD-2555O16.3
ENSG00000108187	2.17379	up	1.44372e-09	PBLD
ENSG00000271964	2.1736	up	0.00737416	RP11-415F23.2
ENSG00000160145	2.16699	up	0.000237938	KALRN
ENSG00000171757	2.16519	up	0.00169645	LRRC34
ENSG00000224138	2.16421	up	7.3853e-06	AC000123.4
ENSG00000189221	2.15763	up	0.0110089	MAOA
ENSG00000118507	2.1454	up	5.17483e-05	AKAP7
ENSG00000258012	2.13884	up	5.51914e-12	RP11-603K19.1
ENSG00000257658	2.13726	up	0.00891757	RP3-521E19.3
ENSG00000107742	2.13268	up	5.25722e-08	SPOCK2
ENSG00000271851	2.12285	up	0.00142367	RP11-565F19.2
ENSG00000250917	2.12105	up	4.90298e-05	RP4-785G19.5
ENSG00000245534	2.11448	up	0.000778556	RP11-219B17.1
ENSG00000171806	2.11149	up	0	METTL18
ENSG00000129028	2.10815	up	3.39688e-11	THAP10
ENSG00000188517	2.10371	up	9.54792e-15	COL25A1
ENSG00000203497	2.09427	up	0.00316666	PDCD4-AS1
ENSG00000205744	2.09327	up	0.00957496	DENND1C
ENSG00000166704	2.09007	up	2.29708e-08	ZNF606
ENSG00000259389	2.08738	up	0.00973275	H3F3AP1
ENSG00000260060	2.0811	up	0.000864466	RP11-388M20.1
ENSG00000146166	2.07579	up	0	LGSN
ENSG00000197362	2.07162	up	3.9746e-14	ZNF786
ENSG00000250329	2.06818	up	0.00226455	KDELC1P1
ENSG00000153391	2.06137	up	0.00173894	INO80C
ENSG00000204052	2.06085	up	0.00510119	LRRC73
ENSG00000219891	2.05581	up	2.35103e-06	ZSCAN12P1
ENSG00000203632	2.04645	up	0.0107846	AC007690.1
ENSG00000214900	2.04457	up	0.000772992	C14orf182
ENSG00000005421	2.04144	up	4.58511e-05	PON1
ENSG00000261533	2.03206	up	0.00057077	RP11-15N24.4
ENSG00000178997	2.0313	up	0.0100865	EXD1
ENSG00000254578	2.02995	up	0.00843157	CTD-2517M22.16
ENSG00000259932	2.02823	up	0.00457128	CTD-2651B20.7
ENSG00000151025	2.02334	up	0	GPR158
ENSG00000170270	2.02236	up	0	C14orf142
ENSG00000272279	2.01252	up	0.00980631	RP11-157J24.2
ENSG00000273466	2.00977	up	0.00913175	RP11-548H3.1
ENSG00000125122	2.00765	up	0.000611903	LRRC29
ENSG00000171160	2.00372	up	0.000232319	MORN4
ENSG00000224635	1.99341	up	3.10556e-06	RP4-564F22.5
ENSG00000249803	1.98897	up	0.00417674	RP11-114H21.2
ENSG00000165716	1.98661	up	0.00224656	FAM69B
ENSG00000214694	1.9841	up	0.00688007	ARHGEF33
ENSG00000130997	1.97591	up	5.7656e-08	POLN
ENSG00000186280	1.97506	up	1.9762e-14	KDM4D
ENSG00000061455	1.97389	up	2.14062e-11	PRDM6
ENSG00000240280	1.96271	up	0.001852	TCAM1P
ENSG00000260766	1.95883	up	3.18089e-08	RP11-226L15.5
ENSG00000269640	1.95881	up	5.2558e-13	CTD-2521M24.9
ENSG00000167799	1.95614	up	0.00857916	NUDT8
ENSG00000249572	1.95406	up	0.00981794	CTD-2203K17.1
ENSG00000143110	1.94262	up	0.00928976	C1orf162
ENSG00000188707	1.94238	up	1.19238e-13	ZBED6CL
ENSG00000237818	1.94059	up	0.00216083	RPS3AP29
ENSG00000237505	1.93839	up	0.000555895	RP11-76N22.2
ENSG00000267152	1.93687	up	0.00492585	CTD-2528L19.6
ENSG00000254473	1.93585	up	0.00524531	RP11-522I20.3
ENSG00000174276	1.93547	up	3.71638e-11	ZNHIT2
ENSG00000197566	1.92835	up	1.30206e-07	ZNF624
ENSG00000123411	1.92257	up	1.29277e-05	IKZF4
ENSG00000132016	1.92241	up	8.56224e-10	C19orf57
ENSG00000259414	1.92013	up	0.00882993	HERC2P7
ENSG00000270143	1.92008	up	0.00193387	AC004257.3
ENSG00000230259	1.90948	up	0.000191004	AC008738.1
ENSG00000179818	1.90436	up	0	PCBP1-AS1
ENSG00000165449	1.89697	up	0.000783866	SLC16A9
ENSG00000156853	1.89685	up	0	ZNF689
ENSG00000158966	1.89634	up	3.40214e-06	CACHD1
ENSG00000141642	1.88741	up	1.3847e-05	ELAC1
ENSG00000239911	1.88124	up	0.000157218	PRKAG2-AS1
ENSG00000226416	1.88009	up	0.00145573	MRPL23-AS1
ENSG00000235774	1.87916	up	0.0107592	AC023347.1
ENSG00000236066	1.87663	up	0.00397958	RP11-389O22.1
ENSG00000157950	1.87654	up	0.00153257	SSX2B
ENSG00000273338	1.87636	up	1.33227e-15	RP11-386I14.4
ENSG00000253276	1.87596	up	0.00121622	CCDC71L
ENSG00000261690	1.87577	up	0.00170152	AC009133.12
ENSG00000196267	1.87482	up	8.33965e-07	ZNF836
ENSG00000105662	1.87434	up	1.70756e-05	CRTC1
ENSG00000137338	1.87339	up	0	PGBD1
ENSG00000158458	1.86753	up	9.79567e-07	NRG2
ENSG00000227285	1.86048	up	0.0109952	RP3-327A19.5
ENSG00000161912	1.85779	up	0.0112368	ADCY10P1
ENSG00000153896	1.85587	up	0.00661314	ZNF599
ENSG00000272010	1.85566	up	0.00824524	CTD-3025N20.3
ENSG00000207313	1.85532	up	0.00724752	SNORA2B
ENSG00000163577	1.85484	up	9.85763e-05	EIF5A2
ENSG00000261051	1.85326	up	1.20058e-05	RP11-274H2.5
ENSG00000177614	1.85173	up	0.00458967	PGBD5
ENSG00000260023	1.84378	up	0.000217132	RP11-49C24.1
ENSG00000237522	1.84002	up	0.000689832	NONOP2
ENSG00000185518	1.83966	up	9.55937e-05	SV2B
ENSG00000257815	1.83794	up	2.69651e-05	RP11-611E13.2
ENSG00000245848	1.8374	up	0.000369842	CEBPA
ENSG00000231113	1.83286	up	0.000271587	RP3-475N16.1
ENSG00000118503	1.82226	up	2.5091e-14	TNFAIP3
ENSG00000262468	1.81749	up	0.00303379	RP11-95P2.1
ENSG00000255813	1.81733	up	0.0001807	AL162497.1
ENSG00000225806	1.81277	up	0.00194016	RP1-309F20.3
ENSG00000200169	1.81212	up	0.000165029	RNU5D-1
ENSG00000271647	1.8117	up	2.29224e-05	KRT8P47
ENSG00000265666	1.81135	up	0.00176128	CTD-2267D19.2
ENSG00000205217	1.80997	up	0.0112366	FAM106B
ENSG00000159885	1.80666	up	0.010789	ZNF222
ENSG00000261542	1.80313	up	3.71922e-05	RP11-16E18.3
ENSG00000271826	1.8027	up	1.16716e-06	RP1-93I3.1
ENSG00000145087	1.79959	up	2.23478e-06	STXBP5L
ENSG00000226124	1.79923	up	0.00072265	FTCDNL1
ENSG00000212607	1.79608	up	0.00486821	SNORA45
ENSG00000105982	1.79131	up	9.85142e-07	RNF32
ENSG00000140287	1.79046	up	0.000363848	HDC
ENSG00000128016	1.78728	up	0.000483865	ZFP36
ENSG00000203943	1.78613	up	0.00286103	SAMD13
ENSG00000105708	1.78356	up	1.5099e-14	ZNF14
ENSG00000177640	1.78237	up	9.01498e-05	CASC2
ENSG00000137573	1.78061	up	0.00402049	SULF1
ENSG00000269044	1.7766	up	1.34307e-06	CTC-429P9.3
ENSG00000270820	1.77006	up	0.000801659	RP11-355B11.2
ENSG00000223820	1.76896	up	1.42331e-13	CFL1P1
ENSG00000165730	1.76775	up	4.44837e-11	STOX1
ENSG00000113739	1.76565	up	0	STC2
ENSG00000119514	1.76548	up	0.000199845	GALNT12
ENSG00000262251	1.75963	up	0.000166435	RP11-199F11.2
ENSG00000135747	1.75949	up	1.99829e-06	ZNF670
ENSG00000168237	1.75638	up	0.000566488	GLYCTK
ENSG00000187824	1.75561	up	3.39354e-06	TMEM220
ENSG00000116761	1.75445	up	0	CTH
ENSG00000189060	1.7505	up	0	H1F0
ENSG00000267480	1.74595	up	0.000340409	RP11-703I16.1
ENSG00000240758	1.7448	up	0.00886818	RP11-155G14.6
ENSG00000116667	1.7433	up	2.95273e-06	C1orf21
ENSG00000153234	1.74283	up	0	NR4A2
ENSG00000197019	1.74052	up	9.9214e-12	SERTAD1
ENSG00000154736	1.73931	up	1.44107e-13	ADAMTS5
ENSG00000254860	1.73807	up	5.30038e-07	TMEM9B-AS1
ENSG00000213588	1.73649	up	4.27016e-08	ZBTB9
ENSG00000119508	1.73553	up	0	NR4A3
ENSG00000139318	1.7342	up	3.92622e-05	DUSP6
ENSG00000135318	1.73254	up	8.44314e-09	NT5E
ENSG00000231806	1.73035	up	0.00690854	PCAT7
ENSG00000165899	1.72823	up	4.71731e-07	OTOGL
ENSG00000165572	1.72704	up	0	KBTBD6
ENSG00000198948	1.72665	up	3.96951e-09	MFAP3L
ENSG00000260896	1.72177	up	0	RP11-314O13.1
ENSG00000137393	1.7217	up	9.14824e-14	RNF144B
ENSG00000175155	1.71578	up	0.000343199	YPEL2
ENSG00000129204	1.71314	up	7.6194e-05	USP6
ENSG00000186017	1.71245	up	0	ZNF566
ENSG00000204792	1.71168	up	0.00186811	AC104135.3
ENSG00000254353	1.71106	up	0.00527206	RP11-195E2.4
ENSG00000236081	1.70909	up	0.00229676	AC074389.9
ENSG00000235325	1.70858	up	0.00772661	AC009963.6
ENSG00000183208	1.70598	up	6.90769e-06	GDPGP1
ENSG00000099625	1.70502	up	0.00861582	C19orf26
ENSG00000019549	1.70221	up	0	SNAI2
ENSG00000105088	1.7021	up	0.000153521	OLFM2
ENSG00000245146	1.70089	up	7.42509e-05	LINC01024
ENSG00000273081	1.6989	up	0.00149191	RP4-813F11.4
ENSG00000140403	1.69852	up	0.00729436	DNAJA4
ENSG00000236813	1.69848	up	0.00773246	BTF3P8
ENSG00000271828	1.69611	up	0.00374477	CTD-2310F14.1
ENSG00000186086	1.69453	up	0.000831798	NBPF6
ENSG00000172594	1.69306	up	0.000414905	SMPDL3A
ENSG00000164626	1.69299	up	5.15178e-05	KCNK5
ENSG00000234329	1.68958	up	0.0118165	RP11-767N6.2
ENSG00000186487	1.68895	up	2.7202e-08	MYT1L
ENSG00000227954	1.68782	up	4.28162e-08	RP3-323P13.2
ENSG00000100664	1.68756	up	0	EIF5
ENSG00000271335	1.68506	up	7.23244e-07	RP11-324I22.4
ENSG00000224934	1.68422	up	8.81932e-05	RP11-441O15.3
ENSG00000178665	1.6789	up	2.83251e-05	ZNF713
ENSG00000180479	1.67752	up	2.66224e-05	ZNF571
ENSG00000244300	1.67735	up	2.96511e-09	RP11-475N22.4
ENSG00000261519	1.6771	up	0.00786739	Y_RNA
ENSG00000128011	1.67611	up	0.00231036	LRFN1
ENSG00000006638	1.67445	up	9.23994e-06	TBXA2R
ENSG00000131849	1.67436	up	0.00012334	ZNF132
ENSG00000246308	1.674	up	0.00526	RP11-685M7.3
ENSG00000167840	1.67321	up	0	ZNF232
ENSG00000197044	1.67038	up	1.19257e-05	ZNF441
ENSG00000249740	1.66966	up	0.000903257	CTD-2127H9.1
ENSG00000161395	1.66966	up	4.17341e-05	PGAP3
ENSG00000187801	1.66894	up	1.36894e-06	ZFP69B
ENSG00000115325	1.66822	up	5.33974e-05	DOK1
ENSG00000233230	1.66461	up	0.0094054	AC079807.2
ENSG00000132109	1.66448	up	1.27631e-12	TRIM21
ENSG00000119227	1.66345	up	0.00147573	PIGZ
ENSG00000135407	1.66129	up	2.46017e-11	AVIL
ENSG00000185220	1.65757	up	2.54177e-11	PGBD2
ENSG00000257489	1.65532	up	0.000123466	RP11-175P13.3
ENSG00000268218	1.65435	up	0.000441842	AC137932.1
ENSG00000168906	1.65415	up	0	MAT2A
ENSG00000131848	1.65102	up	0.000240231	ZSCAN5A
ENSG00000137273	1.65017	up	1.22751e-11	FOXF2
ENSG00000019485	1.64928	up	4.04786e-07	PRDM11
ENSG00000165312	1.64871	up	2.74859e-06	OTUD1
ENSG00000154957	1.64842	up	2.22045e-16	ZNF18
ENSG00000241476	1.64712	up	0.0114684	SSX2
ENSG00000249971	1.64676	up	0.00744955	RP11-256P1.1
ENSG00000165985	1.64403	up	1.8335e-06	C1QL3
ENSG00000182993	1.64263	up	5.58983e-05	C12orf60
ENSG00000172508	1.64051	up	0.00436342	CARNS1
ENSG00000244485	1.63861	up	0.0103932	RPL18P13
ENSG00000139289	1.63787	up	0	PHLDA1
ENSG00000197748	1.63751	up	0.00166907	WDR96
ENSG00000141933	1.63512	up	0.00698826	TPGS1
ENSG00000272593	1.63448	up	0.00465612	RP11-339B21.11
ENSG00000212304	1.6321	up	0.00233189	SNORD12
ENSG00000133111	1.62948	up	3.4981e-07	RFXAP
ENSG00000251032	1.62891	up	0.00634729	RP11-483H11.1
ENSG00000237438	1.62854	up	7.19374e-07	CECR7
ENSG00000179979	1.62545	up	0.00284489	CRIPAK
ENSG00000178809	1.62485	up	0.00172851	TRIM73
ENSG00000198807	1.62024	up	1.65161e-06	PAX9
ENSG00000155592	1.61803	up	8.14904e-14	ZKSCAN2
ENSG00000238198	1.61481	up	0.00022288	RP11-31F15.2
ENSG00000189423	1.61471	up	1.74339e-07	USP32P3
ENSG00000260966	1.61367	up	7.38054e-12	RP11-690D19.3
ENSG00000271870	1.6132	up	0.000162303	RP11-97C16.1
ENSG00000268798	1.60744	up	0.00512303	AC027307.3
ENSG00000242689	1.60691	up	0.000214697	CNTF
ENSG00000152217	1.60639	up	1.00317e-06	SETBP1
ENSG00000229670	1.60618	up	0.00499092	PKP4P1
ENSG00000112365	1.60068	up	0	ZBTB24
ENSG00000260534	1.5996	up	1.74283e-12	RP11-1006G14.4
ENSG00000132950	1.5993	up	9.32587e-15	ZMYM5
ENSG00000174137	1.5991	up	0.00528829	FAM53A
ENSG00000267121	1.59806	up	7.35403e-07	CTD-2020K17.1
ENSG00000146267	1.59759	up	4.98583e-08	FAXC
ENSG00000054179	1.59618	up	0.0101814	ENTPD2
ENSG00000260920	1.59311	up	0.000276028	RP1-228H13.5
ENSG00000236144	1.59199	up	1.58096e-13	AD000090.2
ENSG00000129514	1.59071	up	4.66849e-12	FOXA1
ENSG00000236824	1.59043	up	1.42458e-09	BCYRN1
ENSG00000189136	1.59012	up	0.00231198	UBE2Q2P1
ENSG00000262194	1.58883	up	0.00616967	CTD-3195I5.5
ENSG00000248109	1.58839	up	1.79206e-05	CTC-295J13.3
ENSG00000163602	1.58829	up	0	RYBP
ENSG00000272638	1.58792	up	0.00898131	GS1-114I9.1
ENSG00000169084	1.58745	up	8.19567e-13	DHRSX
ENSG00000200463	1.58623	up	0.00179891	SNORD118
ENSG00000235194	1.58499	up	8.89801e-06	PPP1R3E
ENSG00000136158	1.58478	up	1.32648e-08	SPRY2
ENSG00000215319	1.58462	up	0.00528465	RP11-98L4.1
ENSG00000213190	1.58169	up	1.55732e-07	MLLT11
ENSG00000120875	1.57842	up	2.74336e-12	DUSP4
ENSG00000069667	1.57758	up	3.86873e-06	RORA
ENSG00000165030	1.57701	up	0	NFIL3
ENSG00000188997	1.57562	up	1.01211e-09	KCTD21
ENSG00000224505	1.57462	up	0.00784776	AC002117.1
ENSG00000125871	1.5743	up	0	MGME1
ENSG00000261556	1.57162	up	4.65516e-12	RP11-296I10.6
ENSG00000132846	1.57098	up	2.21913e-08	ZBED3
ENSG00000164330	1.5701	up	0.000181021	EBF1
ENSG00000177788	1.56938	up	9.82557e-05	RP5-1061H20.4
ENSG00000232093	1.56869	up	0.000553291	RP11-307C12.11
ENSG00000101680	1.56828	up	0	LAMA1
ENSG00000231025	1.56821	up	0.000126127	RP11-175O19.4
ENSG00000261526	1.5669	up	4.21016e-05	CTB-31O20.2
ENSG00000198150	1.56675	up	0.00727392	AC135178.1
ENSG00000266651	1.56636	up	2.09655e-05	RP11-138I1.3
ENSG00000177842	1.5658	up	0.00114866	ZNF620
ENSG00000132825	1.5654	up	5.90499e-11	PPP1R3D
ENSG00000206630	1.56279	up	0.00875855	SNORD60
ENSG00000182600	1.56053	up	0.0016319	C2orf82
ENSG00000165506	1.56041	up	1.5854e-13	DNAAF2
ENSG00000271976	1.55928	up	7.24774e-06	RP11-884K10.7
ENSG00000156804	1.55865	up	7.12077e-11	FBXO32
ENSG00000180423	1.55724	up	1.39403e-06	HARBI1
ENSG00000196741	1.55674	up	0.00592638	CXorf24
ENSG00000130818	1.55551	up	3.49045e-08	ZNF426
ENSG00000187984	1.55522	up	0.000428269	ANKRD19P
ENSG00000095739	1.55501	up	3.68916e-11	BAMBI
ENSG00000166289	1.55492	up	2.20464e-08	PLEKHF1
ENSG00000163171	1.55455	up	0	CDC42EP3
ENSG00000084710	1.55344	up	6.57412e-10	EFR3B
ENSG00000126804	1.55305	up	0	ZBTB1
ENSG00000138380	1.55262	up	1.32964e-07	CARF
ENSG00000249700	1.5521	up	0.0111528	SRD5A3-AS1
ENSG00000157240	1.55104	up	0.00459846	FZD1
ENSG00000127311	1.55103	up	1.46926e-09	HELB
ENSG00000139618	1.55059	up	0	BRCA2
ENSG00000121931	1.54735	up	1.44798e-11	LRIF1
ENSG00000233728	1.54717	up	0.0119757	RP11-109P14.9
ENSG00000141576	1.54627	up	0.00027525	RNF157
ENSG00000105085	1.5453	up	1.26682e-10	MED26
ENSG00000176720	1.54395	up	1.09236e-07	BOK
ENSG00000230615	1.54364	up	4.44089e-16	RP5-1198O20.4
ENSG00000151967	1.54317	up	7.99671e-06	SCHIP1
ENSG00000178409	1.54286	up	0	BEND3
ENSG00000180035	1.54105	up	2.18439e-08	ZNF48
ENSG00000163633	1.54098	up	0.000379507	C4orf36
ENSG00000183579	1.54063	up	2.13607e-13	ZNRF3
ENSG00000151917	1.54037	up	0.00124773	BEND6
ENSG00000152518	1.53979	up	4.44089e-16	ZFP36L2
ENSG00000267436	1.53856	up	0	AC005786.7
ENSG00000272807	1.53829	up	0.00578259	RP11-260M2.1
ENSG00000198142	1.53803	up	0	SOWAHC
ENSG00000124613	1.53752	up	0.000190325	ZNF391
ENSG00000188211	1.53681	up	9.16405e-09	NCR3LG1
ENSG00000162419	1.53584	up	3.51321e-10	GMEB1
ENSG00000135362	1.53501	up	1.90417e-08	PRR5L
ENSG00000236269	1.53491	up	0.000318643	ENO1-IT1
ENSG00000245849	1.53297	up	0.000296034	RAD51-AS1
ENSG00000226688	1.53244	up	0.000119823	ENTPD1-AS1
ENSG00000196338	1.53228	up	0.00742126	NLGN3
ENSG00000260261	1.53165	up	1.55215e-07	RP11-480A16.1
ENSG00000228801	1.53145	up	2.79464e-05	RP11-110G21.1
ENSG00000196507	1.53116	up	0.0119133	TCEAL3
ENSG00000152433	1.53103	up	0.00022145	ZNF547
ENSG00000175898	1.52986	up	0.00570723	CTD-2369P2.2
ENSG00000273038	1.52937	up	0.00857755	RP11-479G22.8
ENSG00000243453	1.52918	up	0.00885359	COX7BP1
ENSG00000203499	1.52649	up	0.00295688	FAM83H-AS1
ENSG00000232040	1.5254	up	4.56162e-07	SCAND3
ENSG00000204685	1.52395	up	0.00123548	AC012307.3
ENSG00000173276	1.52359	up	0	ZBTB21
ENSG00000228486	1.52252	up	0.0062121	AC017099.3
ENSG00000128965	1.5208	up	0	CHAC1
ENSG00000138678	1.52041	up	1.43564e-07	AGPAT9
ENSG00000127083	1.52036	up	0.00410562	OMD
ENSG00000143248	1.5187	up	0.000191107	RGS5
ENSG00000260107	1.51808	up	0.00328418	AC005606.15
ENSG00000267957	1.51748	up	0.00209218	RP11-178G16.4
ENSG00000163684	1.51727	up	0	RPP14
ENSG00000160888	1.51567	up	0	IER2
ENSG00000201098	1.5145	up	4.73022e-05	RNY1
ENSG00000104859	1.51333	up	6.89917e-07	CLASRP
ENSG00000196417	1.51287	up	2.02083e-12	ZNF765
ENSG00000110060	1.51183	up	1.15241e-13	PUS3
ENSG00000167384	1.51128	up	1.21332e-08	ZNF180
ENSG00000124688	1.51077	up	0	MAD2L1BP
ENSG00000115738	1.51007	up	2.14382e-07	ID2
ENSG00000186834	1.50844	up	0	HEXIM1
ENSG00000272077	1.50801	up	2.76559e-05	RP11-348P10.2
ENSG00000255154	1.50751	up	0.000419585	RPP14
ENSG00000237753	1.50669	up	0.00126774	AC079922.3
ENSG00000257167	1.5058	up	2.10343e-06	TMPO-AS1
ENSG00000180611	1.50382	up	3.74264e-08	MB21D2
ENSG00000245556	1.50354	up	0.00107273	CTD-2037K23.2
ENSG00000128713	1.50351	up	1.17022e-06	HOXD11
ENSG00000261452	1.50194	up	7.53137e-05	RP11-509E16.1
ENSG00000172197	1.5017	up	1.30784e-13	MBOAT1
ENSG00000005812	1.50109	up	0	FBXL3
ENSG00000171617	1.50009	up	0.00356515	ENC1
ENSG00000114268	-1.50045	down	4.4726e-07	PFKFB4
ENSG00000250240	-1.50249	down	0.00966932	CTD-2154I11.2
ENSG00000204525	-1.50452	down	0.000105104	HLA-C
ENSG00000273090	-1.50515	down	0.0013513	RP11-78I14.1
ENSG00000144642	-1.50519	down	2.13542e-05	RBMS3
ENSG00000100031	-1.50569	down	8.5347e-06	GGT1
ENSG00000196436	-1.50611	down	0.000981883	NPIPB15
ENSG00000239523	-1.50625	down	0.00901807	MYLK-AS1
ENSG00000206503	-1.50934	down	5.66746e-10	HLA-A
ENSG00000272140	-1.51051	down	0.00663639	RP11-574K11.29
ENSG00000128266	-1.5112	down	0.00214858	GNAZ
ENSG00000250033	-1.5114	down	0.000232078	SLC7A11-AS1
ENSG00000258016	-1.51233	down	0.0010111	HIGD1AP1
ENSG00000023445	-1.51271	down	1.53445e-08	BIRC3
ENSG00000134470	-1.51443	down	0.00628566	IL15RA
ENSG00000167549	-1.51537	down	9.19371e-07	CORO6
ENSG00000105650	-1.51692	down	0.00266569	PDE4C
ENSG00000250869	-1.5177	down	0.00585495	RP11-453N18.1
ENSG00000105929	-1.51931	down	0.000173415	ATP6V0A4
ENSG00000248161	-1.51938	down	0.0098368	RP11-499E18.1
ENSG00000107738	-1.52156	down	0.00991459	C10orf54
ENSG00000230551	-1.52353	down	0	CTB-89H12.4
ENSG00000185245	-1.52425	down	0.000808934	GP1BA
ENSG00000106992	-1.52465	down	2.8332e-10	AK1
ENSG00000130477	-1.52489	down	2.26026e-13	UNC13A
ENSG00000109046	-1.52557	down	0	WSB1
ENSG00000259022	-1.52588	down	0.000912363	DNAJC8P1
ENSG00000247240	-1.52734	down	0.00439393	UBL7-AS1
ENSG00000203999	-1.528	down	5.92705e-09	RP11-290F20.1
ENSG00000215244	-1.52811	down	0.00735249	RP11-563J2.2
ENSG00000265168	-1.52817	down	0.00155798	RP11-192H23.5
ENSG00000255414	-1.52944	down	2.80633e-06	LINC01059
ENSG00000231064	-1.52952	down	0.00591314	RP11-263K19.4
ENSG00000170899	-1.53259	down	2.41274e-05	GSTA4
ENSG00000100968	-1.53289	down	0.00365439	NFATC4
ENSG00000183401	-1.53317	down	0.0120513	CCDC159
ENSG00000213185	-1.53337	down	0.00647219	FAM24B
ENSG00000205794	-1.53971	down	0.00621115	RP11-333E13.4
ENSG00000266208	-1.54023	down	0.00150875	CTD-2267D19.3
ENSG00000100934	-1.54023	down	0	SEC23A
ENSG00000242599	-1.54037	down	0.0043107	CSAG4
ENSG00000170262	-1.5404	down	0.00949435	MRAP
ENSG00000196878	-1.54047	down	0	LAMB3
ENSG00000214018	-1.54427	down	0.000996294	RRM2P3
ENSG00000100307	-1.54481	down	1.2412e-05	CBX7
ENSG00000140545	-1.54712	down	0.000134709	MFGE8
ENSG00000139410	-1.54769	down	0.000477203	SDSL
ENSG00000142552	-1.55185	down	1.22225e-09	RCN3
ENSG00000237361	-1.55281	down	0.000173668	LINC01071
ENSG00000204682	-1.55579	down	1.52817e-06	CASC10
ENSG00000224424	-1.55647	down	6.95588e-05	PRKAR2A-AS1
ENSG00000260498	-1.5565	down	0.00167736	RP4-536B24.4
ENSG00000268189	-1.5597	down	0.000931271	AC005785.2
ENSG00000101298	-1.55975	down	8.56974e-05	SNPH
ENSG00000211451	-1.56126	down	0.00116617	GNRHR2
ENSG00000227766	-1.56298	down	0.00281314	HCG4P5
ENSG00000237853	-1.56522	down	0.00177905	RP5-833A20.1
ENSG00000235945	-1.56525	down	0.00244367	AC002543.2
ENSG00000271933	-1.56657	down	2.7559e-05	RP11-338I21.1
ENSG00000226232	-1.56837	down	0.0013799	RP11-419C5.2
ENSG00000160345	-1.57104	down	0.00607675	C9orf116
ENSG00000179627	-1.57181	down	0.00809676	ZBTB42
ENSG00000128510	-1.57223	down	1.9285e-24	CPA4
ENSG00000106211	-1.5733	down	1.99564e-15	HSPB1
ENSG00000270071	-1.57389	down	0.00675344	AP001172.2
ENSG00000234771	-1.57596	down	4.10755e-05	RP11-395P17.3
ENSG00000240541	-1.57601	down	6.53533e-05	TM4SF1-AS1
ENSG00000105289	-1.57794	down	9.72831e-17	TJP3
ENSG00000233459	-1.58089	down	0.0035686	AC125238.2
ENSG00000090013	-1.58221	down	0	BLVRB
ENSG00000188660	-1.5827	down	1.18581e-21	LINC00319
ENSG00000105655	-1.58645	down	0.00487737	ISYNA1
ENSG00000110900	-1.5866	down	0.0030358	TSPAN11
ENSG00000234962	-1.58696	down	0.00468695	LINC00700
ENSG00000111711	-1.58842	down	0	GOLT1B
ENSG00000213186	-1.58865	down	1.26417e-23	TRIM59
ENSG00000148671	-1.58871	down	0.00270184	ADIRF
ENSG00000127329	-1.58957	down	2.50746e-06	PTPRB
ENSG00000124762	-1.59027	down	8.28076e-22	CDKN1A
ENSG00000156097	-1.59284	down	0.00210914	GPR61
ENSG00000205221	-1.59304	down	0.000126013	VIT
ENSG00000251593	-1.5949	down	1.33883e-30	MSNP1
ENSG00000259375	-1.59677	down	8.82434e-11	RP11-815J21.2
ENSG00000179564	-1.59817	down	4.92449e-07	LSMEM2
ENSG00000172889	-1.59865	down	4.22136e-13	EGFL7
ENSG00000180694	-1.59993	down	1.84563e-29	TMEM64
ENSG00000162614	-1.60116	down	2.13985e-18	NEXN
ENSG00000230649	-1.60127	down	0.00853449	AC024084.1
ENSG00000205336	-1.6026	down	2.66947e-07	GPR56
ENSG00000272288	-1.60365	down	0.00535507	RP11-140K17.3
ENSG00000126709	-1.60445	down	2.47179e-08	IFI6
ENSG00000105518	-1.60855	down	1.64716e-33	TMEM205
ENSG00000267484	-1.6087	down	1.27563e-07	CTC-518P12.6
ENSG00000263004	-1.60887	down	0.00919402	RP11-166P13.3
ENSG00000138161	-1.61093	down	0.000341139	CUZD1
ENSG00000226432	-1.61308	down	0.000110762	CTD-2015B23.2
ENSG00000116977	-1.61561	down	2.53366e-13	LGALS8
ENSG00000232053	-1.61577	down	0.00768366	AC009784.3
ENSG00000187608	-1.61604	down	0.00033135	ISG15
ENSG00000267649	-1.61639	down	0.00925559	CTD-2587H24.10
ENSG00000233077	-1.61768	down	3.89505e-06	RP11-290F20.2
ENSG00000218027	-1.6179	down	0.00175678	RP11-157J24.1
ENSG00000257065	-1.61873	down	0.00176452	RP3-468K18.5
ENSG00000235721	-1.62049	down	0.0105012	AC013268.3
ENSG00000188641	-1.62265	down	3.41592e-27	DPYD
ENSG00000134533	-1.62277	down	1.26966e-11	RERG
ENSG00000088002	-1.62765	down	0.00277469	SULT2B1
ENSG00000185885	-1.62848	down	5.18054e-09	IFITM1
ENSG00000084764	-1.62885	down	0.0055096	MAPRE3
ENSG00000100167	-1.62979	down	0.00310225	2016-09-03
ENSG00000248785	-1.63036	down	8.02268e-05	HIGD1AP14
ENSG00000224177	-1.63447	down	1.2509e-07	LINC00570
ENSG00000230221	-1.6348	down	0.00384449	RP11-173G21.1
ENSG00000251682	-1.63752	down	0.000534455	RP11-631M6.3
ENSG00000108823	-1.63793	down	0.00263081	SGCA
ENSG00000244380	-1.63798	down	0.00711666	RP11-24C3.2
ENSG00000267168	-1.63811	down	2.35889e-08	RP11-318A15.7
ENSG00000185519	-1.63975	down	0.000308605	FAM131C
ENSG00000258334	-1.64131	down	1.68815e-08	RP11-161H23.9
ENSG00000215039	-1.64163	down	0.00511848	CD27-AS1
ENSG00000140506	-1.6449	down	1.02204e-10	LMAN1L
ENSG00000162729	-1.6461	down	1.14004e-21	IGSF8
ENSG00000259316	-1.64842	down	8.1247e-12	CTD-2116N17.1
ENSG00000130748	-1.65066	down	0.000292852	TMEM160
ENSG00000231312	-1.65207	down	6.87021e-08	AC007246.3
ENSG00000224888	-1.65453	down	1.60527e-07	RP5-1142A6.2
ENSG00000244161	-1.65897	down	0.000986424	FLNB-AS1
ENSG00000066248	-1.6614	down	3.09579e-05	NGEF
ENSG00000169330	-1.66148	down	1.30302e-06	KIAA1024
ENSG00000188897	-1.67662	down	7.06841e-11	CTD-3088G3.8
ENSG00000074416	-1.67965	down	1.47873e-21	MGLL
ENSG00000133805	-1.68389	down	0.00396792	AMPD3
ENSG00000166578	-1.68503	down	3.17803e-07	IQCD
ENSG00000173237	-1.68551	down	7.33269e-14	C11orf86
ENSG00000235902	-1.68597	down	0.00279365	RP11-626E13.1
ENSG00000273284	-1.6888	down	0.00604845	RP11-888D10.4
ENSG00000143847	-1.6894	down	8.95035e-05	PPFIA4
ENSG00000270959	-1.70076	down	0.000454126	LPP-AS2
ENSG00000238165	-1.70311	down	0.00389298	AC007560.1
ENSG00000231789	-1.71201	down	0.0110995	RP11-558F24.4
ENSG00000006283	-1.71336	down	1.38965e-06	CACNA1G
ENSG00000182376	-1.715	down	0.0124118	RP5-1142A6.8
ENSG00000171303	-1.71572	down	0.00487679	KCNK3
ENSG00000233221	-1.71627	down	0.00367646	AC133785.1
ENSG00000187017	-1.71646	down	1.17203e-05	ESPN
ENSG00000072858	-1.721	down	0.0110741	SIDT1
ENSG00000233231	-1.72143	down	0.00901391	HNRNPA1P49
ENSG00000151150	-1.72393	down	7.63056e-07	ANK3
ENSG00000267748	-1.72446	down	1.97199e-22	CTB-102L5.4
ENSG00000260206	-1.72737	down	0.000266573	CTD-2026K11.2
ENSG00000222009	-1.72809	down	0.0014411	BTBD19
ENSG00000175003	-1.72925	down	0.00199823	SLC22A1
ENSG00000166863	-1.72971	down	0.00101684	TAC3
ENSG00000175868	-1.73034	down	0.001227	CALCB
ENSG00000204386	-1.73178	down	0.00287447	NEU1
ENSG00000223704	-1.73624	down	0.000654864	RP1-90L6.2
ENSG00000247095	-1.73796	down	0.0110403	MIR210HG
ENSG00000229593	-1.73845	down	0.0082142	SUCLA2P3
ENSG00000233590	-1.74144	down	0.0122717	RP11-153K11.3
ENSG00000115828	-1.74448	down	3.59378e-05	QPCT
ENSG00000165171	-1.74714	down	0.00018932	WBSCR27
ENSG00000257222	-1.75419	down	0.00964543	RP11-554E23.4
ENSG00000188760	-1.76586	down	0.00596096	TMEM198
ENSG00000229841	-1.76911	down	0.000311514	RP11-361K17.2
ENSG00000224165	-1.77014	down	0.00186332	DNAJC27-AS1
ENSG00000259288	-1.77259	down	1.17264e-05	RP11-133K1.2
ENSG00000244009	-1.7737	down	0.0106238	RP11-227J5.3
ENSG00000181016	-1.77465	down	0.00179714	LSMEM1
ENSG00000105696	-1.77621	down	0.00154283	TMEM59L
ENSG00000137101	-1.77662	down	0.000649853	CD72
ENSG00000251661	-1.77749	down	0.00288464	RP11-326C3.11
ENSG00000269985	-1.77971	down	0.0051198	RP1-232P20.1
ENSG00000226824	-1.78033	down	0.0104175	RP4-756H11.3
ENSG00000125618	-1.7817	down	0.00690664	PAX8
ENSG00000212993	-1.78305	down	3.59574e-09	POU5F1B
ENSG00000170017	-1.7844	down	4.13517e-17	ALCAM
ENSG00000104892	-1.78731	down	0.00375454	KLC3
ENSG00000229891	-1.79658	down	0.00999403	Z83851.1
ENSG00000169314	-1.80461	down	0.000162194	C22orf15
ENSG00000143369	-1.8068	down	6.42025e-06	ECM1
ENSG00000049769	-1.80691	down	2.72904e-07	PPP1R3F
ENSG00000269657	-1.80846	down	0.000731388	AC079210.1
ENSG00000268279	-1.81313	down	1.75437e-05	RP11-434D12.1
ENSG00000198468	-1.81785	down	6.77068e-08	FLVCR1-AS1
ENSG00000187193	-1.81912	down	9.35616e-12	MT1X
ENSG00000232818	-1.82014	down	0.00458703	RPS2P32
ENSG00000229980	-1.82228	down	0.000224678	TOB1-AS1
ENSG00000256664	-1.82313	down	4.41837e-06	RP11-611O2.3
ENSG00000220635	-1.82326	down	0.0121308	KRASP1
ENSG00000171219	-1.82337	down	0.00226411	CDC42BPG
ENSG00000267102	-1.82709	down	0.00372013	RP11-686D22.7
ENSG00000101335	-1.83106	down	8.34272e-06	MYL9
ENSG00000272153	-1.83383	down	0.00550612	RP1-286D6.5
ENSG00000139278	-1.83593	down	1.7601e-27	GLIPR1
ENSG00000123405	-1.83601	down	2.61994e-05	NFE2
ENSG00000078018	-1.83618	down	6.21848e-06	MAP2
ENSG00000139192	-1.83677	down	3.29102e-05	TAPBPL
ENSG00000147689	-1.84016	down	2.06388e-07	FAM83A
ENSG00000255509	-1.8415	down	0.00890598	RP11-445F12.1
ENSG00000130066	-1.84153	down	0	SAT1
ENSG00000125730	-1.84325	down	4.33645e-08	C3
ENSG00000143554	-1.85423	down	3.47879e-06	SLC27A3
ENSG00000266456	-1.85833	down	0.0038829	RP11-806L2.2
ENSG00000258021	-1.85921	down	3.16343e-05	RP11-1100L3.4
ENSG00000135406	-1.86032	down	1.47278e-09	PRPH
ENSG00000065618	-1.8606	down	4.53769e-05	COL17A1
ENSG00000270557	-1.86337	down	0.00890598	RP11-546J1.1
ENSG00000239373	-1.86897	down	0.00342662	RN7SL425P
ENSG00000260892	-1.87056	down	0.005048	CTD-2026K11.1
ENSG00000099957	-1.87133	down	3.09202e-07	P2RX6
ENSG00000257270	-1.87391	down	5.6533e-05	RP11-521B24.5
ENSG00000182676	-1.87562	down	0.00750684	PPP1R27
ENSG00000128250	-1.87662	down	0.00375776	RFPL1
ENSG00000235701	-1.87794	down	0.000699329	PCBP2P1
ENSG00000271793	-1.87829	down	2.40445e-14	RP11-321N4.5
ENSG00000167123	-1.89218	down	1.2023e-33	CERCAM
ENSG00000100078	-1.89893	down	1.84308e-05	PLA2G3
ENSG00000237025	-1.90072	down	0.00865845	RP1-315G1.1
ENSG00000252139	-1.90377	down	0.00410248	SCARNA18
ENSG00000182326	-1.9046	down	2.82112e-22	C1S
ENSG00000228812	-1.90501	down	0.0110781	RP11-157P1.5
ENSG00000203819	-1.90765	down	0.0011873	HIST2H2BC
ENSG00000166473	-1.90969	down	1.22587e-13	PKD1L2
ENSG00000229992	-1.91012	down	0.0042353	HMGB3P9
ENSG00000256897	-1.91555	down	0.00814044	RP11-17G12.2
ENSG00000260430	-1.91625	down	0.00325768	RP11-626G11.4
ENSG00000248323	-1.92317	down	4.92499e-11	LUCAT1
ENSG00000236060	-1.92899	down	0.00611991	HSPB1P1
ENSG00000247011	-1.9365	down	0.00534567	RP11-700H6.1
ENSG00000259222	-1.93761	down	0.0117025	RP11-809H16.5
ENSG00000165949	-1.94011	down	0.00696877	IFI27
ENSG00000203301	-1.94536	down	0.00902359	AL590822.1
ENSG00000238266	-1.94634	down	0.00360009	LINC00707
ENSG00000231871	-1.94669	down	4.57565e-05	IPO9-AS1
ENSG00000163888	-1.94721	down	0.00103491	CAMK2N2
ENSG00000235159	-1.94966	down	0.00151433	RP6-109B7.4
ENSG00000243414	-1.95316	down	6.00992e-15	TICAM2
ENSG00000089847	-1.95592	down	0.00307383	ANKRD24
ENSG00000149571	-1.95612	down	0.000368921	KIRREL3
ENSG00000228124	-1.95617	down	0.00872413	RP1-122O8.7
ENSG00000155265	-1.95617	down	0.00392542	GOLGA7B
ENSG00000189350	-1.958	down	0.00981097	FAM179A
ENSG00000226026	-1.96076	down	0.00218196	RP11-57H12.3
ENSG00000272909	-1.96304	down	1.16663e-08	CTD-2555O16.4
ENSG00000188732	-1.96421	down	0.0101022	FAM221A
ENSG00000132837	-1.97325	down	4.40489e-06	DMGDH
ENSG00000165887	-1.97366	down	0.000299099	ANKRD2
ENSG00000164674	-1.97936	down	0.000778924	SYTL3
ENSG00000257557	-1.99086	down	0.000350739	RP11-84G21.1
ENSG00000235010	-1.99128	down	0.00660233	RP11-140A10.3
ENSG00000271105	-1.99888	down	0.00442029	SCML2P2
ENSG00000188095	-2.00146	down	0.000204421	MESP2
ENSG00000260052	-2.00998	down	0.00777028	CTC-527H23.3
ENSG00000214773	-2.01059	down	0.0107424	RP11-717D12.1
ENSG00000267440	-2.01375	down	0.00225903	CTC-501O10.1
ENSG00000229780	-2.01387	down	0.00189842	UBE2Q1-AS1
ENSG00000240751	-2.01495	down	0.0051302	RP11-553D4.2
ENSG00000137948	-2.01556	down	0.000645155	BRDT
ENSG00000156219	-2.0202	down	0.00890598	ART3
ENSG00000267539	-2.0202	down	0.00890598	RP11-138H8.7
ENSG00000213714	-2.0202	down	0.00890598	FAM209B
ENSG00000125531	-2.0202	down	0.00361235	C20orf195
ENSG00000108352	-2.02029	down	0.00156291	RAPGEFL1
ENSG00000109061	-2.02175	down	0.004345	MYH1
ENSG00000259049	-2.02358	down	1.74984e-28	RP11-589M4.1
ENSG00000010295	-2.02482	down	0.00792323	IFFO1
ENSG00000250320	-2.02485	down	0.000262872	CTD-2269F5.1
ENSG00000100302	-2.0259	down	0.0040873	RASD2
ENSG00000233901	-2.02651	down	0.00201846	RP11-65J3.1
ENSG00000246228	-2.02919	down	1.98762e-19	CASC8
ENSG00000270892	-2.03149	down	0.0117937	AC006077.4
ENSG00000235245	-2.03782	down	0.00276494	RP11-122K13.12
ENSG00000260660	-2.03837	down	0.000836828	RP11-69H7.2
ENSG00000181444	-2.04004	down	0.00408121	ZNF467
ENSG00000100033	-2.04662	down	0.00241141	PRODH
ENSG00000233030	-2.04687	down	0.00584152	RP11-196G18.3
ENSG00000261087	-2.04763	down	2.77696e-11	KB-1460A1.5
ENSG00000171798	-2.05358	down	0.000202417	KNDC1
ENSG00000180422	-2.0605	down	0.00435373	LINC00304
ENSG00000214402	-2.07269	down	0.00473746	LCNL1
ENSG00000111087	-2.07676	down	3.46037e-05	GLI1
ENSG00000269690	-2.07893	down	0.0073053	AC096677.1
ENSG00000227060	-2.08145	down	3.12382e-07	LINC00629
ENSG00000116661	-2.09182	down	2.39324e-15	FBXO2
ENSG00000241120	-2.09389	down	0.00313153	HMGN1P8
ENSG00000214676	-2.0973	down	0.000508546	RPL9P16
ENSG00000269599	-2.10109	down	0.005672	RP11-261P24.2
ENSG00000261429	-2.11067	down	0.0107884	DPPA2P4
ENSG00000131095	-2.1108	down	0.00848486	GFAP
ENSG00000122861	-2.11709	down	1.55975e-06	PLAU
ENSG00000229334	-2.12033	down	0.000556534	AC046143.3
ENSG00000149131	-2.13078	down	0.000139081	SERPING1
ENSG00000244176	-2.13125	down	0.000758079	RP11-810P12.1
ENSG00000229221	-2.13303	down	0.00890598	HNRNPA1P66
ENSG00000236512	-2.13303	down	0.00654054	RP3-336K20__B.2
ENSG00000247121	-2.1353	down	0.00262216	CTD-2260A17.2
ENSG00000261606	-2.13618	down	0	RP11-414J4.2
ENSG00000186842	-2.13927	down	0.00984035	LINC00846
ENSG00000261369	-2.14435	down	0.00368326	RP11-474B12.1
ENSG00000212766	-2.14521	down	0.00827699	LINC00277
ENSG00000257954	-2.15457	down	0.00526563	RP11-161H23.10
ENSG00000250230	-2.15769	down	0.00809897	RP11-855O10.2
ENSG00000236045	-2.16207	down	0.00719226	RP3-467K16.7
ENSG00000197587	-2.16655	down	0.00258797	DMBX1
ENSG00000101049	-2.16681	down	0.000863133	SGK2
ENSG00000250509	-2.16713	down	1.0104e-10	CTC-573N18.1
ENSG00000251169	-2.17103	down	0.000274733	AC005355.2
ENSG00000244573	-2.17329	down	0.00845363	RPL30P11
ENSG00000156510	-2.17704	down	2.79797e-11	HKDC1
ENSG00000253270	-2.17991	down	0.00123188	RP11-1105O14.1
ENSG00000205644	-2.1842	down	0.00366134	CTD-2375G15.1
ENSG00000105668	-2.1893	down	0.00800338	UPK1A
ENSG00000229893	-2.19402	down	0.00150587	AC004549.6
ENSG00000251127	-2.19942	down	9.30227e-05	RP11-280G9.1
ENSG00000131015	-2.20053	down	2.21402e-10	ULBP2
ENSG00000234693	-2.20247	down	0.00677771	RP4-530I15.6
ENSG00000269781	-2.20722	down	0.000172724	FLJ20306
ENSG00000253669	-2.212	down	3.02683e-07	KB-1732A1.1
ENSG00000176029	-2.22254	down	0.00817581	C11orf16
ENSG00000237331	-2.2261	down	0.0124157	XIAP-AS1
ENSG00000251201	-2.23712	down	6.93636e-19	TMED7-TICAM2
ENSG00000105550	-2.24443	down	1.69372e-08	FGF21
ENSG00000225762	-2.25162	down	0.00696553	RP11-511I2.2
ENSG00000243885	-2.25169	down	4.06328e-08	RP11-278L15.2
ENSG00000267882	-2.25193	down	0.00642332	AL031666.2
ENSG00000269535	-2.25303	down	0.000734525	CTD-2525I3.6
ENSG00000265728	-2.25327	down	4.78862e-05	RP11-883A18.3
ENSG00000246560	-2.25664	down	0.0014081	RP11-10L12.4
ENSG00000250091	-2.27229	down	0.00234277	DNAH10OS
ENSG00000213578	-2.27233	down	6.04745e-24	CPLX3
ENSG00000259827	-2.27506	down	4.17864e-06	RP11-343H19.2
ENSG00000167653	-2.27747	down	1.6952e-05	PSCA
ENSG00000162366	-2.28145	down	0.00385021	PDZK1IP1
ENSG00000262454	-2.28402	down	0.0073078	RP11-65J21.3
ENSG00000228677	-2.28544	down	9.90401e-06	TTC3-AS1
ENSG00000238008	-2.28728	down	0.00416551	AC132515.1
ENSG00000255910	-2.28801	down	0.00027506	RP11-405A12.2
ENSG00000255650	-2.29668	down	0.00148157	FAM222A-AS1
ENSG00000259448	-2.29856	down	0.00210363	RP11-16E12.1
ENSG00000235440	-2.30009	down	0.00376352	RP11-214J9.1
ENSG00000271265	-2.30056	down	0.00509716	RP11-230C9.4
ENSG00000226772	-2.30279	down	0.00594539	CTA-747E2.10
ENSG00000158525	-2.30982	down	0.00247049	CPA5
ENSG00000119535	-2.30993	down	0.00378805	CSF3R
ENSG00000273211	-2.31255	down	0.005672	RP13-131K19.7
ENSG00000058404	-2.31255	down	0.00361235	CAMK2B
ENSG00000188672	-2.31335	down	0.00107949	RHCE
ENSG00000257732	-2.31504	down	0.00175973	RP11-818F20.5
ENSG00000080166	-2.32015	down	0.00361235	DCT
ENSG00000168280	-2.32015	down	0.00699658	KIF5C
ENSG00000250040	-2.32015	down	0.00361235	AC006499.8
ENSG00000261168	-2.33699	down	0.000894738	RP11-68I18.10
ENSG00000242876	-2.33818	down	0.00560505	RN7SL812P
ENSG00000144596	-2.34608	down	0.000847534	GRIP2
ENSG00000170011	-2.3477	down	0.00361235	MYRIP
ENSG00000176597	-2.3477	down	0.00361235	B3GNT5
ENSG00000188580	-2.3477	down	0.00361235	NKAIN2
ENSG00000264978	-2.3477	down	0.00579145	RN7SL630P
ENSG00000254294	-2.34935	down	0.00012258	IMPDH1P6
ENSG00000270030	-2.35168	down	0.0116965	RP11-326C3.13
ENSG00000230826	-2.36469	down	0.000172503	RP11-417B4.2
ENSG00000259523	-2.36659	down	0.00667954	RP11-680F8.3
ENSG00000224057	-2.36662	down	1.93976e-08	EGFR-AS1
ENSG00000129226	-2.37361	down	9.46704e-08	CD68
ENSG00000235139	-2.37874	down	0.00361235	AC003984.1
ENSG00000167941	-2.37874	down	0.00361235	SOST
ENSG00000142623	-2.37974	down	0.00959232	PADI1
ENSG00000135636	-2.38246	down	0.000135007	DYSF
ENSG00000188385	-2.39148	down	0.00303361	JAKMIP3
ENSG00000188032	-2.39608	down	0.012075	C19orf67
ENSG00000268784	-2.40064	down	0.00233077	MGC2752
ENSG00000144045	-2.40741	down	0.000210914	DQX1
ENSG00000132470	-2.40962	down	1.32627e-16	ITGB4
ENSG00000170209	-2.4154	down	0.00227346	ANKK1
ENSG00000239334	-2.41872	down	0.00893795	GSTTP2
ENSG00000231890	-2.42757	down	5.37631e-07	AC093391.2
ENSG00000248648	-2.42794	down	0.0108194	RP11-485M7.1
ENSG00000270462	-2.43283	down	0.0031804	RP11-342K6.3
ENSG00000272910	-2.43823	down	3.37386e-08	RP11-15L13.4
ENSG00000272768	-2.43955	down	0.000570269	RP4-673M15.1
ENSG00000260604	-2.45423	down	0.0110826	RP1-140K8.5
ENSG00000239581	-2.45463	down	0.0011577	RP11-19G24.1
ENSG00000261544	-2.4559	down	0.0116095	RP11-16E23.3
ENSG00000235162	-2.46099	down	0.000154465	C12orf75
ENSG00000155918	-2.46208	down	0.00592159	RAET1L
ENSG00000254561	-2.46371	down	0.00853916	RP11-196E1.3
ENSG00000259357	-2.46427	down	3.18804e-31	RP11-316M1.12
ENSG00000265494	-2.46822	down	0.00639672	RP11-131K5.2
ENSG00000230366	-2.47222	down	0.00585672	DSCR9
ENSG00000222370	-2.47269	down	0.0113523	SNORA36B
ENSG00000006837	-2.47599	down	2.86413e-13	CDKL3
ENSG00000164591	-2.49515	down	0.000690722	MYOZ3
ENSG00000271845	-2.49571	down	0.00949939	RP4-790G17.7
ENSG00000238228	-2.50036	down	0.009055	OR7E7P
ENSG00000227844	-2.50474	down	0.000899661	RP13-143G15.3
ENSG00000172031	-2.5056	down	0.00392542	EPHX4
ENSG00000189099	-2.51082	down	0.00738121	PRSS48
ENSG00000138798	-2.51232	down	3.55431e-13	EGF
ENSG00000243746	-2.51644	down	0.00343515	EEF1A1P10
ENSG00000165091	-2.51707	down	0.00214243	TMC1
ENSG00000140931	-2.51732	down	0.000621371	CMTM3
ENSG00000105963	-2.5194	down	0.0116782	ADAP1
ENSG00000253730	-2.52896	down	0.00520211	RP11-893F2.13
ENSG00000137809	-2.52898	down	0.00843244	ITGA11
ENSG00000222371	-2.52934	down	0.00445566	RN7SKP202
ENSG00000266127	-2.53603	down	0.00110576	RP11-474N24.2
ENSG00000273035	-2.54038	down	0.00629635	RP11-449G16.1
ENSG00000237101	-2.54155	down	1.71766e-06	RP11-365O16.6
ENSG00000243220	-2.54529	down	0.00361235	AC006159.4
ENSG00000236274	-2.54845	down	0.00447367	RP4-728D4.3
ENSG00000273443	-2.54934	down	0.00402044	RP11-54O7.18
ENSG00000270427	-2.56313	down	0.00119281	NRBF2P5
ENSG00000236047	-2.56688	down	0.00978035	AC073410.1
ENSG00000230841	-2.57584	down	0.00222011	RP5-915N17.3
ENSG00000260360	-2.57808	down	0.00637511	RP11-533E19.5
ENSG00000137225	-2.57894	down	0.00783375	CAPN11
ENSG00000143851	-2.58157	down	0.0113354	PTPN7
ENSG00000241418	-2.58534	down	0.00015319	RP11-512H23.2
ENSG00000257940	-2.5895	down	0.00548407	RP11-248E9.6
ENSG00000203797	-2.59751	down	0.00277976	DDO
ENSG00000159625	-2.59789	down	0.00712511	CCDC135
ENSG00000264843	-2.60184	down	2.57746e-07	RP11-856M7.2
ENSG00000197046	-2.6048	down	0.00258182	SIGLEC15
ENSG00000228126	-2.6082	down	0.0105594	LINC00568
ENSG00000234945	-2.61348	down	2.05478e-29	AC109828.1
ENSG00000260617	-2.62818	down	1.74009e-06	RP5-1142A6.7
ENSG00000214184	-2.65868	down	0.00815434	AC012487.2
ENSG00000099960	-2.66284	down	0.00057056	SLC7A4
ENSG00000261070	-2.66324	down	0.00259065	RP11-554A11.8
ENSG00000237243	-2.67071	down	0.00447818	AC022173.2
ENSG00000269736	-2.67171	down	0.00778757	CTD-2521M24.11
ENSG00000228157	-2.68734	down	0.000279089	AC007952.5
ENSG00000267096	-2.6896	down	0.00481798	CTD-2537I9.13
ENSG00000204710	-2.692	down	0.00507358	SPDYC
ENSG00000267470	-2.69469	down	0.00376178	ZNF571-AS1
ENSG00000183876	-2.70412	down	0.00635792	ARSI
ENSG00000122711	-2.71294	down	2.15494e-36	SPINK4
ENSG00000178821	-2.71782	down	6.29477e-06	TMEM52
ENSG00000253802	-2.72246	down	0.00241252	CTA-392C11.1
ENSG00000105877	-2.72265	down	3.298e-41	DNAH11
ENSG00000178107	-2.72774	down	0.000492442	RP11-998D10.4
ENSG00000223979	-2.73379	down	0.00743192	SMCR2
ENSG00000100060	-2.73828	down	3.64927e-05	MFNG
ENSG00000204136	-2.74613	down	0.00520035	GGTA1P
ENSG00000250397	-2.74716	down	0.000122521	RP11-1391J7.1
ENSG00000243609	-2.76016	down	0.00521359	RPS2P44
ENSG00000265739	-2.76144	down	0.000959043	RP11-354P11.3
ENSG00000099994	-2.76457	down	1.80589e-05	SUSD2
ENSG00000135960	-2.77178	down	0.000480099	EDAR
ENSG00000234139	-2.77498	down	0.00886922	RP4-550H1.4
ENSG00000107317	-2.77679	down	1.45521e-06	PTGDS
ENSG00000172936	-2.78024	down	0.0032776	MYD88
ENSG00000253873	-2.78626	down	0.00864282	PCDHGA11
ENSG00000239100	-2.79916	down	0.0054173	snoU13
ENSG00000104921	-2.80127	down	0.00323297	FCER2
ENSG00000261226	-2.80255	down	0.00438486	RP11-830F9.7
ENSG00000238575	-2.8058	down	0.00124082	snoU109
ENSG00000271642	-2.8242	down	0.0103247	RP11-66E20.2
ENSG00000272940	-2.82664	down	0.0109434	CTA-384D8.33
ENSG00000177947	-2.83295	down	0.00806293	ODF3
ENSG00000241926	-2.85227	down	0.00959817	RP5-1154E9.7
ENSG00000243649	-2.85939	down	1.63235e-19	CFB
ENSG00000215221	-2.85942	down	0.00139311	UBA52P6
ENSG00000260072	-2.86681	down	0.0103713	CTD-2313J23.1
ENSG00000266538	-2.87036	down	0.00183628	RP11-385D13.3
ENSG00000264304	-2.87045	down	0.0100189	RP11-20B24.7
ENSG00000223695	-2.87102	down	0.0097916	RP4-633O19__A.1
ENSG00000273013	-2.87823	down	0.00157756	CTD-2002J20.1
ENSG00000160460	-2.89476	down	0.0078362	SPTBN4
ENSG00000249609	-2.89617	down	0.00171207	RP11-635L1.3
ENSG00000175084	-2.89643	down	1.15942e-15	DES
ENSG00000232374	-2.90028	down	0.00348502	GPR79
ENSG00000261407	-2.90291	down	0.0040652	RP11-326A19.3
ENSG00000244712	-2.91363	down	0.00843244	RP11-874G11.1
ENSG00000269526	-2.91363	down	0.00377353	ERVV-1
ENSG00000005700	-2.91688	down	0	IBTK
ENSG00000260448	-2.9237	down	0.000612416	RP11-449H11.1
ENSG00000254416	-2.92567	down	8.43698e-11	RP11-347E10.1
ENSG00000228288	-2.92914	down	0.00839901	PCAT6
ENSG00000238391	-2.92945	down	0.00874488	RNA5SP233
ENSG00000236187	-2.9323	down	0.00996565	GJA6P
ENSG00000228219	-2.93367	down	0.00336565	NPM1P30
ENSG00000166405	-2.93459	down	0.00504951	RIC3
ENSG00000267473	-2.93512	down	7.04078e-05	AC005789.11
ENSG00000266955	-2.94565	down	0.0088201	RP11-820I16.3
ENSG00000267941	-2.95732	down	0.00875901	AC008267.1
ENSG00000163463	-2.95749	down	2.5e-44	KRTCAP2
ENSG00000258448	-2.95982	down	0.00935446	RP11-109N23.5
ENSG00000101850	-2.96357	down	0.0089671	GPR143
ENSG00000266138	-2.96736	down	0.00404223	RN7SL501P
ENSG00000229368	-2.97209	down	0.00161083	AC090587.4
ENSG00000235236	-2.98019	down	2.42242e-09	RP13-131K19.1
ENSG00000233785	-2.9861	down	0.00288929	RP13-314C10.5
ENSG00000169271	-2.98862	down	0.000657544	HSPB3
ENSG00000102359	-2.98945	down	0.00742625	SRPX2
ENSG00000005448	-2.99683	down	0.00289826	WDR54
ENSG00000205853	-3.00092	down	0.00945641	RFPL3S
ENSG00000272582	-3.00154	down	0.012284	RP5-1039K5.17
ENSG00000143512	-3.00262	down	1.30105e-14	HHIPL2
ENSG00000266644	-3.00629	down	0.00230296	RP11-927P21.2
ENSG00000253660	-3.01248	down	0.00870731	CTC-353G13.1
ENSG00000251365	-3.02042	down	0.0109673	RP11-332J15.3
ENSG00000215184	-3.02402	down	0.00113758	RP11-8L18.2
ENSG00000234283	-3.03535	down	0.00744658	RP11-495P10.6
ENSG00000185296	-3.04382	down	0.00219452	CTD-2139B15.1
ENSG00000253159	-3.04565	down	0.00257693	PCDHGA12
ENSG00000234076	-3.05311	down	0.0122033	TPRG1-AS1
ENSG00000248967	-3.06117	down	0.000864745	RP11-241J12.3
ENSG00000196407	-3.06722	down	0.0107278	THEM5
ENSG00000268472	-3.06726	down	0.000933154	AP002884.2
ENSG00000162746	-3.07091	down	0.00933056	FCRLB
ENSG00000250684	-3.08532	down	0.000526077	KB-1042C11.1
ENSG00000217801	-3.08971	down	4.41811e-08	RP11-465B22.3
ENSG00000224331	-3.09308	down	0.00991159	AC019181.3
ENSG00000163075	-3.0999	down	0.00591015	PCDP1
ENSG00000266473	-3.11671	down	0.0114023	RP11-401F2.3
ENSG00000187536	-3.12105	down	0.00834057	TPM3P7
ENSG00000255252	-3.12542	down	0.00026361	RP1-65P5.3
ENSG00000237976	-3.13234	down	0.00960718	RP11-126K1.6
ENSG00000225808	-3.13449	down	0.00297365	DNAJC19P5
ENSG00000199545	-3.13636	down	0.00609237	RNA5SP195
ENSG00000129194	-3.14123	down	3.89156e-05	SOX15
ENSG00000238037	-3.15796	down	0.0107644	RP4-675G8.4
ENSG00000259895	-3.16207	down	0.00496474	RP11-715J22.2
ENSG00000167178	-3.1632	down	0.0070166	ISLR2
ENSG00000232022	-3.16365	down	0.000594355	RP5-1109J22.1
ENSG00000252620	-3.16368	down	0.00771357	RNU6ATAC24P
ENSG00000079393	-3.16481	down	0.0113669	DUSP13
ENSG00000258752	-3.16564	down	0.00522301	RP11-356K23.1
ENSG00000168079	-3.17011	down	0	SCARA5
ENSG00000005243	-3.18503	down	0.00244579	COPZ2
ENSG00000248712	-3.18666	down	0.000435096	CCDC153
ENSG00000257531	-3.18884	down	0.000953463	RP3-405J10.2
ENSG00000169129	-3.19274	down	0.000608584	AFAP1L2
ENSG00000238113	-3.19527	down	0.000197854	RP11-262H14.1
ENSG00000267518	-3.20687	down	0.00377353	RP11-794C22.2
ENSG00000162755	-3.21018	down	0.0113847	KLHDC9
ENSG00000102452	-3.21812	down	2.71922e-05	NALCN
ENSG00000225222	-3.21842	down	0.00137733	CHCHD4P5
ENSG00000253119	-3.22004	down	0.00337645	HNRNPA3P7
ENSG00000270314	-3.22151	down	0.000804285	GS1-165B14.2
ENSG00000226393	-3.22402	down	0.00405743	IFNA20P
ENSG00000249249	-3.22486	down	3.94516e-14	AC010226.4
ENSG00000270857	-3.24469	down	0.00708601	RP11-757G14.3
ENSG00000116774	-3.26333	down	0.004375	OLFML3
ENSG00000225187	-3.26396	down	0.00643186	AC073283.7
ENSG00000197599	-3.2862	down	0.00227868	CCDC154
ENSG00000216588	-3.28974	down	0.00487135	IGSF23
ENSG00000258811	-3.29291	down	0.00964316	CTD-3051D23.1
ENSG00000203260	-3.29395	down	0.00466317	AL356475.1
ENSG00000227619	-3.29989	down	0.00772239	RP11-492E3.2
ENSG00000168491	-3.30004	down	0.000123779	CCDC110
ENSG00000266993	-3.30144	down	1.13035e-17	RP4-657D16.3
ENSG00000258485	-3.30481	down	0.000381793	SRMP2
ENSG00000234324	-3.30907	down	0.00314233	RPL9P2
ENSG00000137965	-3.32424	down	0.00323297	IFI44
ENSG00000227914	-3.33208	down	0.00278734	RP11-130C19.3
ENSG00000226352	-3.33853	down	0.00349447	RP11-523H24.3
ENSG00000270137	-3.33952	down	0.000658844	CTC-137K3.1
ENSG00000267849	-3.34443	down	0.00378731	AL133262.1
ENSG00000234624	-3.34564	down	0.0069204	AC016894.1
ENSG00000214041	-3.34762	down	0.00467332	PGAM1P4
ENSG00000260816	-3.36077	down	0.00586787	RP11-319G9.3
ENSG00000157227	-3.37554	down	0.00262366	MMP14
ENSG00000255409	-3.39825	down	0.0054886	RSF1-IT1
ENSG00000168484	-3.3986	down	0.0111696	SFTPC
ENSG00000249961	-3.40735	down	0.00403661	CCDC79
ENSG00000238450	-3.40793	down	0.00640985	snoU13
ENSG00000228313	-3.41436	down	0.00198287	CTD-2555K7.4
ENSG00000253959	-3.42339	down	0.00146868	CTB-43E15.1
ENSG00000095370	-3.42419	down	0.000692757	SH2D3C
ENSG00000260460	-3.42896	down	0.00888919	RP11-284F21.8
ENSG00000271380	-3.46063	down	1.23784e-08	RP11-307C12.12
ENSG00000214659	-3.49011	down	0.00251576	KRT8P26
ENSG00000228450	-3.50771	down	0.000632154	RP1-154J13.3
ENSG00000239332	-3.51059	down	0.00125824	AC016722.2
ENSG00000253955	-3.51096	down	0.00137893	CTB-33O18.3
ENSG00000235262	-3.51531	down	0.00176873	KDM5C-IT1
ENSG00000184060	-3.51966	down	2.00472e-05	ADAP2
ENSG00000213755	-3.52686	down	0.00367329	RP11-342F17.1
ENSG00000246877	-3.53158	down	0.00399983	DNM1P35
ENSG00000250286	-3.5447	down	0.00196075	RP11-94C24.8
ENSG00000261143	-3.54856	down	0.00576431	RP11-114H24.5
ENSG00000256609	-3.59395	down	0.00255926	RP11-64B16.4
ENSG00000230623	-3.61686	down	0.00260175	RP11-469A15.2
ENSG00000175336	-3.62776	down	0.0053434	APOF
ENSG00000264859	-3.65674	down	3.51874e-09	RP11-75N4.2
ENSG00000127129	-3.66992	down	0.00168412	EDN2
ENSG00000251665	-3.68734	down	0.000561293	RP11-700H6.2
ENSG00000130649	-3.68975	down	0.000108377	CYP2E1
ENSG00000152154	-3.70541	down	0.000143372	TMEM178A
ENSG00000227838	-3.70947	down	0.00837192	RP1-213J1P__B.1
ENSG00000253167	-3.71185	down	5.54259e-11	KIAA0196-AS1
ENSG00000266946	-3.72072	down	0.00067521	MRPL37P1
ENSG00000225297	-3.72125	down	0.00204665	RP4-612C19.2
ENSG00000258571	-3.75373	down	0.00384414	PTTG4P
ENSG00000249417	-3.77986	down	0.00787159	RP11-438D8.2
ENSG00000112212	-3.78662	down	0.00015983	TSPO2
ENSG00000116690	-3.79707	down	4.69169e-17	PRG4
ENSG00000233444	-3.79985	down	0.00176853	AC013262.1
ENSG00000149260	-3.80058	down	1.97529e-05	CAPN5
ENSG00000236266	-3.80353	down	0.0107156	RP3-467L1.4
ENSG00000205622	-3.80454	down	2.11813e-05	AF064858.6
ENSG00000254632	-3.82241	down	0.00297505	RP11-21L23.4
ENSG00000270553	-3.82309	down	0.000499051	RP11-15E18.5
ENSG00000254907	-3.83023	down	7.04348e-09	RP11-484D2.2
ENSG00000243094	-3.84711	down	0.00220268	RP11-1084A12.1
ENSG00000255348	-3.8599	down	0.00349177	RP11-700F16.3
ENSG00000227456	-3.89319	down	0.000550487	LINC00310
ENSG00000270733	-3.90435	down	0.00157469	RP11-231P20.5
ENSG00000254338	-3.90506	down	0.000443083	RP11-909N17.3
ENSG00000184507	-3.90544	down	0.00259435	NUTM1
ENSG00000259573	-3.90973	down	0.000632564	NMNAT1P5
ENSG00000262188	-3.98992	down	0.000394411	RP11-353N14.4
ENSG00000273345	-3.99231	down	6.72377e-21	CTD-2410N18.4
ENSG00000123838	-4.00241	down	4.08973e-06	C4BPA
ENSG00000239617	-4.00843	down	4.28156e-05	RP11-302B13.1
ENSG00000271715	-4.01364	down	0.000745144	CTD-2256P15.5
ENSG00000245156	-4.05394	down	1.0466e-11	RP11-867G23.3
ENSG00000162006	-4.08701	down	0.00382256	MSLNL
ENSG00000176868	-4.09011	down	0.000388886	AL358781.1
ENSG00000144550	-4.10229	down	0.000612958	CPNE9
ENSG00000273185	-4.17017	down	0.00120881	RP11-98C1.1
ENSG00000254821	-4.25168	down	0.000308406	RP3-400B16.4
ENSG00000177688	-4.28193	down	9.66142e-05	SUMO4
ENSG00000185955	-4.4086	down	0.000669464	C7orf61
ENSG00000062582	-4.425	down	0	MRPS24
ENSG00000011465	-4.44545	down	3.15703e-05	DCN
ENSG00000140368	-4.44755	down	7.9679e-05	PSTPIP1
ENSG00000238288	-4.4893	down	0.000975621	RP11-100G15.4
ENSG00000262209	-4.59456	down	0.00134485	PCDHGB3
ENSG00000237685	-4.67079	down	1.59001e-05	RP11-360O19.4
ENSG00000244332	-4.73484	down	1.77821e-23	RP11-119K6.6
ENSG00000234603	-4.79401	down	2.21041e-06	AL356740.1
ENSG00000165507	-4.91682	down	0.000263406	C10orf10
ENSG00000271743	-4.93414	down	4.00367e-06	CTD-2541M15.3
ENSG00000253328	-5.01271	down	0.000402202	KB-431C1.3
ENSG00000259347	-5.02632	down	0.000137333	RP11-798K3.2
ENSG00000258378	-5.08052	down	9.51515e-05	RP11-517O13.1
ENSG00000266347	-5.08922	down	0.000429767	AC068641.1
ENSG00000105357	-5.13554	down	9.34734e-05	MYH14
ENSG00000227495	-5.14762	down	2.13136e-17	AC109333.10
ENSG00000272971	-5.18265	down	0.000126577	RP11-284F21.11
ENSG00000182580	-5.20486	down	2.83697e-05	EPHB3
ENSG00000140481	-5.21222	down	0.000355059	CCDC33
ENSG00000169583	-5.2583	down	1.63479e-08	CLIC3
ENSG00000248810	-5.29442	down	6.52455e-06	RP11-362F19.1
ENSG00000267255	-5.36047	down	1.40332e-09	CTB-50L17.5
ENSG00000230212	-5.39815	down	9.20044e-26	AP000688.14
ENSG00000228237	-5.41868	down	1.53475e-05	EFCAB14-AS1
ENSG00000214262	-5.43317	down	3.03397e-06	ANKRD36BP1
ENSG00000172379	-5.44912	down	0.000419994	ARNT2
ENSG00000118514	-5.45205	down	1.38119e-05	ALDH8A1
ENSG00000157303	-5.56215	down	5.61202e-05	SUSD3
ENSG00000260621	-5.58748	down	2.49891e-10	RP11-413H22.2
ENSG00000137843	-5.64085	down	5.15309e-11	PAK6
ENSG00000273262	-5.69735	down	2.54524e-08	RP11-18I14.11
ENSG00000255863	-5.72667	down	5.999e-20	AC073610.5
ENSG00000237989	-5.77015	down	4.39995e-05	AP001046.5
ENSG00000205710	-5.78409	down	2.55737e-05	C17orf107
ENSG00000229044	-5.84017	down	4.40542e-06	RP11-266K22.2
ENSG00000226066	-6.10057	down	4.08987e-06	AC009541.1
ENSG00000236358	-6.42894	down	5.92477e-05	RP5-827C21.2
ENSG00000229528	-6.50361	down	1.06144e-06	RP5-1066H13.4
ENSG00000106328	-6.54578	down	1.63125e-13	FSCN3
ENSG00000243637	-6.6945	down	0	AC019221.4
ENSG00000267987	-6.97668	down	4.06947e-12	AL161784.1
ENSG00000224570	-7.14013	down	6.89391e-07	RP11-430H12.2
ENSG00000251018	-7.77001	down	1.25668e-08	RP11-80G7.1
ENSG00000268964	-7.99677	down	1.85366e-09	ERVV-2
ENSG00000270802	-8.06375	down	6.54492e-07	AC005776.1
ENSG00000223343	-8.21566	down	4.42167e-37	RP13-131K19.2
ENSG00000185689	-8.29343	down	0	C6orf201
ENSG00000167971	-8.50382	down	0	CASKIN1
ENSG00000254236	-8.53518	down	1.54357e-07	KB-1639H6.2
ENSG00000163705	-8.62377	down	6.73355e-26	FANCD2OS
ENSG00000221955	-8.70604	down	4.06023e-16	SLC12A8
ENSG00000267735	-9.89142	down	2.8217e-11	CTD-2265O21.7
ENSG00000258745	-9.97769	down	4.56548e-19	RP11-218E20.5
ENSG00000264346	-11.4545	down	1.34756e-11	SNORA77
ENSG00000227227	-11.482	down	2.71236e-25	AC017101.10
ENSG00000215819	-11.4864	down	3.66602e-13	KRT18P12
ENSG00000260108	-12.3396	down	1.1215e-06	RP11-140H17.1
ENSG00000224516	-12.7177	down	7.7297e-18	AC068134.8
ENSG00000256661	-13.6716	down	9.47814e-14	A2ML1-AS1
ENSG00000178882	-14.3052	down	3.92308e-13	FAM101A
ENSG00000254452	-14.5491	down	1.29261e-17	RP11-867G23.4
ENSG00000263875	-16.0677	down	1.04056e-15	AL353629.1
ENSG00000183531	-18.8118	down	0	Z98256.1
ENSG00000255073	-27.4396	down	0	ZFP91-CNTF
ENSG00000270113	-43.3201	down	4.8544e-41	RP11-282O18.6
ENSG00000244563	-44.0265	down	9.319e-42	AC006011.4
ENSG00000203469	-44.5814	down	9.47e-43	RP5-1113E3.3
ENSG00000229047	-47.6529	down	2.8e-45	AF127577.10
ENSG00000197753	-62.8028	down	0	LHFPL5
ENSG00000260934	-71.7277	down	0	CTA-363E6.7
ENSG00000212768	-113.17	down	0	AC114546.1
ENSG00000255351	-128.985	down	0	RP11-567I13.1

## Sheet: Table S2
Gene ID	Fold Change K562 SHI vs K562 SHC	Regulation	p-value	Gene Symbol
ENSG00000272114	60.6553	up	0	RP1-261G23.7
ENSG00000260570	40.8246	up	2.6852e-41	RP11-24N18.1
ENSG00000177820	20.093	up	0	AC004917.1
ENSG00000233706	14.2895	up	6.93373e-15	RP5-1087E8.3
ENSG00000162873	8.66769	up	6.20958e-10	KLHDC8A
ENSG00000269834	7.34929	up	1.80507e-09	CTD-3018O17.3
ENSG00000260171	7.27959	up	6.77488e-08	RP11-95H11.1
ENSG00000179299	6.71251	up	3.97423e-07	NSUN7
ENSG00000172260	6.42223	up	2.37878e-06	NEGR1
ENSG00000198829	6.3959	up	4.48839e-06	SUCNR1
ENSG00000249006	6.16613	up	8.85472e-06	RP11-317B7.2
ENSG00000076356	5.98894	up	9.57795e-07	PLXNA2
ENSG00000137727	5.57979	up	3.60349e-05	ARHGAP20
ENSG00000228714	5.39423	up	2.71176e-05	RP11-284G10.1
ENSG00000170516	5.39144	up	5.76427e-05	COX7B2
ENSG00000227963	5.34358	up	1.98005e-06	RP5-1074L1.1
ENSG00000122863	5.316	up	0	CHST3
ENSG00000214725	5.3013	up	1.68933e-05	CDIPT-AS1
ENSG00000172183	5.27109	up	2.46362e-06	ISG20
ENSG00000261295	5.1813	up	1.59801e-06	RP11-524D16__A.3
ENSG00000104938	5.07074	up	9.43111e-13	CLEC4M
ENSG00000083290	5.05437	up	0.000202393	ULK2
ENSG00000240925	5.04052	up	0.000104629	RPS20P31
ENSG00000257056	5.01332	up	2.95053e-05	RP11-966I7.2
ENSG00000099840	5.00644	up	9.30708e-05	IZUMO4
ENSG00000154646	4.98508	up	6.97542e-05	TMPRSS15
ENSG00000232525	4.96402	up	0.00216705	SS18L2P1
ENSG00000158815	4.95572	up	0.000140891	FGF17
ENSG00000225928	4.93477	up	0.00130325	CACYBPP1
ENSG00000083067	4.90496	up	0.000168327	TRPM3
ENSG00000270953	4.86459	up	5.05229e-12	RP11-2E11.9
ENSG00000226066	4.85379	up	6.03705e-05	AC009541.1
ENSG00000121318	4.84853	up	3.06656e-06	TAS2R10
ENSG00000270343	4.84529	up	5.4891e-07	UNGP3
ENSG00000145451	4.80058	up	0.00017866	GLRA3
ENSG00000261441	4.76255	up	6.96524e-05	RP11-217B1.2
ENSG00000175894	4.75413	up	0.000417493	TSPEAR
ENSG00000255441	4.74217	up	0.000281022	CTD-2616J11.2
ENSG00000152580	4.62667	up	9.80918e-08	IGSF10
ENSG00000270222	4.61804	up	0.000496815	RP11-105C20.3
ENSG00000187268	4.59784	up	2.90421e-07	FAM9C
ENSG00000261534	4.5834	up	5.06207e-05	RP11-244O19.1
ENSG00000270893	4.56501	up	4.48268e-07	RP11-311B14.1
ENSG00000246763	4.55947	up	0.000293055	RGMB-AS1
ENSG00000116183	4.53331	up	1.55088e-05	PAPPA2
ENSG00000127412	4.47687	up	0.000470386	TRPV5
ENSG00000189221	4.44047	up	3.90208e-07	MAOA
ENSG00000184867	4.42628	up	0.000214936	ARMCX2
ENSG00000234871	4.40114	up	0.00184804	LINC01032
ENSG00000164764	4.3887	up	2.64065e-05	SBSPON
ENSG00000134533	4.38778	up	0.000259827	RERG
ENSG00000198946	4.34178	up	1.51334e-05	SSX4B
ENSG00000185261	4.31112	up	0.000394423	KIAA0825
ENSG00000252826	4.29968	up	0.00302858	RNU1-92P
ENSG00000076641	4.29925	up	0.000759424	PAG1
ENSG00000198521	4.28343	up	0.00035998	ZNF43
ENSG00000143194	4.28038	up	0.000114371	MAEL
ENSG00000179921	4.24637	up	0.000390209	GPBAR1
ENSG00000182909	4.24135	up	1.43006e-05	LENG9
ENSG00000159339	4.23994	up	0.000930062	PADI4
ENSG00000198453	4.22505	up	0.000335036	ZNF568
ENSG00000160321	4.22437	up	3.67459e-09	ZNF208
ENSG00000229009	4.20355	up	0.000169343	TMPRSS11GP
ENSG00000171649	4.19254	up	0.000376194	ZIK1
ENSG00000175899	4.16825	up	0.000308152	A2M
ENSG00000168454	4.1622	up	0.000144466	TXNDC2
ENSG00000177990	4.16041	up	0.000565765	DPY19L2
ENSG00000269040	4.14735	up	0.00136324	CTD-2626G11.3
ENSG00000231616	4.12743	up	0.000517791	RP11-575L7.4
ENSG00000205148	4.12219	up	0.000624087	AC016251.1
ENSG00000264066	4.0992	up	1.45624e-05	MIR144
ENSG00000006747	4.0805	up	8.15467e-10	SCIN
ENSG00000124215	3.97808	up	0.00195338	CDH26
ENSG00000159398	3.97152	up	0.000700693	CES5A
ENSG00000007350	3.95809	up	2.87816e-05	TKTL1
ENSG00000180881	3.95578	up	0.0004972	CAPS2
ENSG00000246526	3.94548	up	9.21015e-05	RP11-539L10.2
ENSG00000171643	3.94173	up	0.000520345	S100Z
ENSG00000184571	3.91886	up	0.00108594	PIWIL3
ENSG00000183439	3.91281	up	0.000769795	TRIM61
ENSG00000243687	3.91014	up	0.000791301	RP11-432B6.1
ENSG00000231201	3.85869	up	0.00330844	AF127577.11
ENSG00000257198	3.85376	up	0.000608695	FAM205B
ENSG00000180537	3.82308	up	0.000700693	RNF182
ENSG00000133317	3.81398	up	0.000170158	LGALS12
ENSG00000233693	3.8037	up	0.00022626	RP11-506O24.1
ENSG00000249464	3.80286	up	7.44136e-05	RP11-93L9.1
ENSG00000228251	3.79746	up	0.000614037	AC012442.6
ENSG00000153779	3.79148	up	0.000762854	TGIF2LX
ENSG00000180999	3.77852	up	0.00388454	C1orf105
ENSG00000228353	3.77136	up	0.00544246	RP11-184A2.2
ENSG00000272301	3.76939	up	0.000222513	RP11-111M22.4
ENSG00000224093	3.76883	up	0.00596764	RP5-1033H22.2
ENSG00000204645	3.76618	up	4.5706e-05	SSX4
ENSG00000267257	3.76321	up	0.000513313	RP11-1151B14.4
ENSG00000154589	3.76074	up	0.000156239	LY96
ENSG00000156127	3.74583	up	0.00387568	BATF
ENSG00000261807	3.73863	up	9.42874e-08	RP11-430C1.1
ENSG00000258927	3.72736	up	6.1139e-13	RP11-1070N10.5
ENSG00000164161	3.71532	up	0.00659931	HHIP
ENSG00000143627	3.71165	up	8.72491e-22	PKLR
ENSG00000134256	3.6983	up	0.00370387	CD101
ENSG00000057704	3.68047	up	9.44145e-09	TMCC3
ENSG00000074657	3.67807	up	0.0110246	ZNF532
ENSG00000090932	3.67659	up	1.35762e-05	DLL3
ENSG00000259582	3.67415	up	0.00939629	RP11-461F11.3
ENSG00000230269	3.66778	up	0.00521443	RP1-40E16.9
ENSG00000250439	3.66074	up	0.000210205	FGD5P1
ENSG00000173698	3.65564	up	0.00371182	GPR64
ENSG00000184524	3.64947	up	0.000248564	CEND1
ENSG00000249655	3.64914	up	0.0023811	CTC-325J23.2
ENSG00000106113	3.64264	up	0.00358695	CRHR2
ENSG00000181634	3.63914	up	0.000543518	TNFSF15
ENSG00000256128	3.63792	up	0.00375163	LINC00944
ENSG00000214822	3.62368	up	0.00281374	KRT16P3
ENSG00000204603	3.61326	up	0.00504589	RP11-638F5.1
ENSG00000174599	3.61114	up	0.00189025	TRAM1L1
ENSG00000122547	3.61114	up	0.00367606	EEPD1
ENSG00000204758	3.60918	up	0.000882301	CTC-308K20.1
ENSG00000089041	3.60026	up	0.00149822	P2RX7
ENSG00000237170	3.60015	up	0.00042764	RPS7P15
ENSG00000150637	3.5969	up	7.99903e-05	CD226
ENSG00000112195	3.59603	up	7.22632e-09	TREML2
ENSG00000145945	3.59224	up	0.00307005	FAM50B
ENSG00000251485	3.58709	up	0.00656088	AC068134.10
ENSG00000262484	3.58192	up	0.00034584	CTC-360G5.1
ENSG00000169314	3.57113	up	0.000140335	C22orf15
ENSG00000222845	3.57068	up	0.000809366	RN7SKP42
ENSG00000231672	3.56952	up	0.00224192	DIRC3
ENSG00000241052	3.56751	up	0.0106282	RP11-173D9.1
ENSG00000225118	3.56359	up	0.00156574	RP11-477L16.2
ENSG00000168356	3.56274	up	0.00381608	SCN11A
ENSG00000258414	3.55366	up	0.0083769	RP11-356O9.1
ENSG00000160345	3.53659	up	1.82514e-05	C9orf116
ENSG00000259664	3.53468	up	0.00223976	CTD-2147F2.2
ENSG00000196724	3.52832	up	0.000264825	ZNF418
ENSG00000198092	3.52181	up	1.79199e-05	TMPRSS11F
ENSG00000256079	3.51905	up	0.000280357	RP11-318G8.2
ENSG00000144218	3.51777	up	0.0036012	AFF3
ENSG00000172548	3.50232	up	7.04222e-05	NIPAL4
ENSG00000181201	3.49207	up	0.00179421	HIST3H2BA
ENSG00000054392	3.48712	up	0.00485207	HHAT
ENSG00000252601	3.47217	up	0.0101699	SNORA18
ENSG00000231344	3.45414	up	0.00461103	RP3-426I6.2
ENSG00000254452	3.45371	up	2.03711e-05	RP11-867G23.4
ENSG00000175820	3.45247	up	0.000611368	CCDC168
ENSG00000270038	3.44862	up	2.33164e-06	RP11-1070N10.7
ENSG00000124610	3.44489	up	0.00159218	HIST1H1A
ENSG00000150627	3.44488	up	0.00667447	WDR17
ENSG00000122711	3.44249	up	0.000812415	SPINK4
ENSG00000244676	3.44117	up	0.0010124	AL109761.5
ENSG00000066248	3.43666	up	0.015348	NGEF
ENSG00000267798	3.43005	up	0.00454404	RP11-333J10.3
ENSG00000273133	3.43001	up	0.000517517	RP11-799M12.2
ENSG00000160161	3.42558	up	0.00845148	CILP2
ENSG00000264424	3.41949	up	0.0120131	MYH4
ENSG00000266196	3.41683	up	0.00121934	RP11-675P14.1
ENSG00000232677	3.40168	up	5.65037e-11	LINC00665
ENSG00000196345	3.39084	up	0.00387926	ZKSCAN7
ENSG00000258142	3.38998	up	0.00485514	RP11-18O15.1
ENSG00000242085	3.38521	up	0.00298232	RPS20P33
ENSG00000266602	3.38323	up	0.00357588	RP11-476K15.1
ENSG00000178172	3.37838	up	4.5241e-05	SPINK6
ENSG00000168070	3.37439	up	0.0053653	C11orf85
ENSG00000225183	3.37151	up	0.00595397	RP4-758J24.4
ENSG00000205300	3.36975	up	0.000447314	RP11-352D3.2
ENSG00000123388	3.36129	up	0.000516845	HOXC11
ENSG00000234043	3.3489	up	0.00258858	RP11-56M3.1
ENSG00000182533	3.34647	up	0.000363031	CAV3
ENSG00000271991	3.34287	up	0.014833	RP11-79O8.1
ENSG00000182103	3.326	up	0.00300616	FAM181B
ENSG00000226958	3.32316	up	1.98592e-15	CTD-2328D6.1
ENSG00000145555	3.32275	up	0.000168417	MYO10
ENSG00000232224	3.29553	up	0.00411759	LINC00202-1
ENSG00000214447	3.29326	up	0.00274981	FAM187A
ENSG00000237505	3.27927	up	9.50221e-08	RP11-76N22.2
ENSG00000176988	3.27476	up	0.000951663	FMR1NB
ENSG00000266341	3.2573	up	0.00588876	RP5-890E16.4
ENSG00000174567	3.2495	up	0.00279157	GOLT1A
ENSG00000176046	3.24539	up	1.14237e-06	NUPR1
ENSG00000164236	3.24365	up	2.07598e-05	ANKRD33B
ENSG00000266040	3.24178	up	0.0111776	CTB-58E17.3
ENSG00000242712	3.23011	up	0.00480256	RN7SL529P
ENSG00000004939	3.2265	up	0.00423594	SLC4A1
ENSG00000205318	3.22437	up	0.00121635	GCNT6
ENSG00000123095	3.22303	up	0.0145092	BHLHE41
ENSG00000169059	3.22146	up	0.0140583	VCX3A
ENSG00000136848	3.21968	up	0.000761118	DAB2IP
ENSG00000255309	3.21188	up	0.000481214	RP11-756D7.1
ENSG00000198796	3.20538	up	7.18456e-08	ALPK2
ENSG00000184368	3.19795	up	0.00075923	MAP7D2
ENSG00000218428	3.16963	up	0.00347664	NIP7P3
ENSG00000232694	3.16278	up	0.00235712	XX-CR54.3
ENSG00000109927	3.15644	up	0.00946845	TECTA
ENSG00000229278	3.15154	up	0.000559225	RP11-483F11.7
ENSG00000267471	3.14884	up	0.0037718	RP11-1058G23.1
ENSG00000068985	3.14595	up	0.000621127	PAGE1
ENSG00000182575	3.1425	up	0.00236383	NXPH3
ENSG00000268849	3.13065	up	0.00231289	SIGLEC22P
ENSG00000041982	3.12832	up	0.00648445	TNC
ENSG00000235514	3.12817	up	0.0055616	AP000226.9
ENSG00000241155	3.12585	up	0.00863373	ARHGAP31-AS1
ENSG00000252348	3.12544	up	0.0079227	RNU6-1256P
ENSG00000202379	3.11649	up	0.000790262	SNORA70
ENSG00000267473	3.11112	up	0.0106617	AC005789.11
ENSG00000183979	3.10145	up	0.0131954	NPB
ENSG00000272016	3.09948	up	4.4491e-15	RP11-215G15.5
ENSG00000227498	3.09663	up	0.00464345	AC018359.3
ENSG00000235347	3.08911	up	6.53983e-06	RP1-37M3.8
ENSG00000174697	3.08758	up	0.000860405	LEP
ENSG00000151812	3.08162	up	0.00426159	SLC35F4
ENSG00000268635	3.07593	up	0.00348266	DKFZP434E1119
ENSG00000112486	3.07398	up	0.00398834	CCR6
ENSG00000231875	3.07153	up	0.00663308	RP11-346E8.1
ENSG00000223685	3.0696	up	0.00239939	LINC00571
ENSG00000159961	3.06745	up	0.011329	OR3A3
ENSG00000241464	3.06562	up	0.0076892	RPL39P38
ENSG00000201036	3.06472	up	0.00338166	SNORD113
ENSG00000247317	3.06345	up	0.00676402	RP11-273G15.2
ENSG00000182057	3.05926	up	0.000570156	Z83851.3
ENSG00000101230	3.05636	up	5.95319e-07	ISM1
ENSG00000206784	3.05442	up	0.00552869	Y_RNA
ENSG00000270077	3.05207	up	0.00666005	KB-1958F4.1
ENSG00000094963	3.04933	up	0.00328074	FMO2
ENSG00000122786	3.04689	up	0.000124277	CALD1
ENSG00000170161	3.04451	up	0.0105007	RP11-262H14.4
ENSG00000265334	3.04441	up	0.00812445	CTD-2349P21.11
ENSG00000187672	3.04215	up	0.00258943	ERC2
ENSG00000179242	3.03395	up	0.00265319	CDH4
ENSG00000256651	3.03188	up	0.00169309	RP11-144O23.8
ENSG00000244062	3.03171	up	0.00496191	RP11-404G16.2
ENSG00000230325	3.02168	up	0.00540503	RP11-385F5.4
ENSG00000237963	3.02147	up	0.000987261	RP11-151G12.2
ENSG00000139549	3.0145	up	0.00817547	DHH
ENSG00000112319	3.01247	up	0.00534157	EYA4
ENSG00000268496	3.01079	up	0.00397309	CTD-2587H19.2
ENSG00000166111	3.00152	up	0.000427059	SVOP
ENSG00000221882	2.99075	up	0.00622512	OR3A2
ENSG00000225606	2.98843	up	0.00390957	AC005281.2
ENSG00000252234	2.97677	up	0.0109206	AC006557.1
ENSG00000215893	2.97566	up	0.00134497	RP4-635E8.1
ENSG00000171408	2.97313	up	0.000199644	PDE7B
ENSG00000247324	2.97209	up	0.001502	RP11-510M2.2
ENSG00000136267	2.96633	up	0.00362968	DGKB
ENSG00000273173	2.96232	up	0.00281924	SNURF
ENSG00000213590	2.95518	up	0.00134329	RP11-229P13.2
ENSG00000232190	2.95411	up	0.00473625	RP11-134D3.1
ENSG00000152128	2.94941	up	0.00138814	TMEM163
ENSG00000149564	2.94552	up	0.00021414	ESAM
ENSG00000240524	2.94242	up	0.00447255	RP5-1061H20.3
ENSG00000231039	2.94155	up	0.000748971	RP11-445P17.3
ENSG00000154898	2.94149	up	2.73844e-10	CCDC144CP
ENSG00000156218	2.94071	up	0.00719168	ADAMTSL3
ENSG00000163520	2.93901	up	5.51372e-12	FBLN2
ENSG00000129028	2.93829	up	0.00743676	THAP10
ENSG00000273437	2.93716	up	0.00772692	RP11-434H6.7
ENSG00000106541	2.92921	up	0.012505	AGR2
ENSG00000261857	2.92827	up	0.0140738	MIA
ENSG00000232407	2.92015	up	0.00301295	RP11-641C17.2
ENSG00000249263	2.91002	up	0.000223932	PARP4P3
ENSG00000255377	2.90505	up	0.00744643	DUXAP5
ENSG00000197083	2.90374	up	0.000118033	ZNF300P1
ENSG00000224452	2.90207	up	0.0115093	RSL24D1P6
ENSG00000268278	2.90071	up	0.00488474	RP11-420K14.1
ENSG00000185345	2.8917	up	2.5936e-10	PARK2
ENSG00000270962	2.89046	up	0.0128809	RP11-403I13.10
ENSG00000223849	2.89037	up	0.00264228	RP11-80I15.1
ENSG00000270583	2.88736	up	0.00147667	RP11-471G13.5
ENSG00000244242	2.88657	up	0.00828973	IFITM10
ENSG00000251654	2.8835	up	0.00733187	RP11-192H6.2
ENSG00000253047	2.88267	up	0.00551657	SNORA40
ENSG00000136383	2.88159	up	2.67232e-09	ALPK3
ENSG00000215568	2.8776	up	0.00587452	GAB4
ENSG00000226669	2.87589	up	0.00681593	RP11-509J21.4
ENSG00000253539	2.87557	up	0.0119268	RP11-402L5.1
ENSG00000164946	2.87501	up	0.000116188	FREM1
ENSG00000229657	2.87418	up	0.0125156	RP11-494K3.2
ENSG00000137869	2.86698	up	3.38337e-07	CYP19A1
ENSG00000228374	2.86652	up	0.0119918	AC012497.2
ENSG00000241743	2.86474	up	0.000192688	RP5-964N17.1
ENSG00000178473	2.85641	up	0.00334974	UCN3
ENSG00000250486	2.85515	up	0.0088878	FAM218A
ENSG00000258227	2.8537	up	0.0108482	CLEC5A
ENSG00000077063	2.85352	up	1.51042e-10	CTTNBP2
ENSG00000269049	2.85207	up	0.014284	AC092291.2
ENSG00000143512	2.84955	up	0.0016459	HHIPL2
ENSG00000241163	2.83934	up	0.000138065	LINC00877
ENSG00000231063	2.83606	up	0.00537065	AC006994.1
ENSG00000234996	2.83331	up	0.00128262	RP11-480I12.7
ENSG00000248869	2.8189	up	0.00309697	RP11-138I17.1
ENSG00000266999	2.81388	up	2.15705e-07	AC015849.16
ENSG00000177689	2.81334	up	0.0159469	MAGEB10
ENSG00000256538	2.80325	up	0.00194597	RP11-847H18.3
ENSG00000271553	2.78171	up	0.0115488	RP11-274B21.10
ENSG00000233276	2.76725	up	0.01149	GPX1
ENSG00000267150	2.75862	up	0.00308636	RP11-411B10.2
ENSG00000197599	2.75692	up	8.37101e-05	CCDC154
ENSG00000160868	2.75418	up	0.000240575	CYP3A4
ENSG00000189056	2.751	up	0	RELN
ENSG00000153347	2.75044	up	0.00710066	FAM81B
ENSG00000270673	2.74858	up	0.000143341	YTHDF3-AS1
ENSG00000132874	2.74239	up	0.0121989	SLC14A2
ENSG00000162398	2.7392	up	0.00169286	C1orf177
ENSG00000268856	2.73607	up	0.00190985	AP001579.1
ENSG00000214821	2.73504	up	0.00662886	HMGB1P4
ENSG00000150540	2.72096	up	2.03318e-10	HNMT
ENSG00000198774	2.71903	up	0.0081357	RASSF9
ENSG00000220091	2.71736	up	0.0129314	LAP3P1
ENSG00000257534	2.71601	up	0.00211969	RP11-834C11.10
ENSG00000231548	2.71499	up	0.014109	OR55B1P
ENSG00000010932	2.71468	up	0.0137471	FMO1
ENSG00000055163	2.71307	up	6.91401e-08	CYFIP2
ENSG00000205181	2.71289	up	0.000433049	LINC00654
ENSG00000185554	2.70789	up	8.33142e-06	NXF2
ENSG00000215160	2.69725	up	0.00366561	OR7E122P
ENSG00000227012	2.69725	up	0.00174074	RP1-97J1.2
ENSG00000165643	2.69725	up	0.00174074	SOHLH1
ENSG00000110328	2.69725	up	0.010544	GALNT18
ENSG00000255540	2.69725	up	0.010544	RP11-313I2.5
ENSG00000143147	2.6969	up	2.47792e-05	GPR161
ENSG00000228501	2.69651	up	0.0010017	RPL15P18
ENSG00000135960	2.68971	up	0.0115169	EDAR
ENSG00000259499	2.68581	up	0.0161538	RP11-616K22.2
ENSG00000238228	2.68481	up	0.00555756	OR7E7P
ENSG00000106069	2.68287	up	0.0138341	CHN2
ENSG00000196660	2.67794	up	1.52091e-15	SLC30A10
ENSG00000173227	2.67739	up	0.00201858	SYT12
ENSG00000273153	2.66958	up	0.00158659	RP11-406H21.2
ENSG00000073331	2.66778	up	1.60358e-31	ALPK1
ENSG00000270218	2.66693	up	0.00873621	RP11-325L12.5
ENSG00000266075	2.66316	up	0.00158659	RN7SL574P
ENSG00000233646	2.66227	up	0.00328909	OR52T1P
ENSG00000228772	2.66189	up	0.0128481	RP1-309H15.2
ENSG00000198223	2.65706	up	0.00606829	CSF2RA
ENSG00000173261	2.65655	up	0.00345701	PLAC8L1
ENSG00000023839	2.65637	up	0.00213047	ABCC2
ENSG00000266014	2.65553	up	0.0121616	RP11-94B19.2
ENSG00000259123	2.6516	up	0.0147784	RP11-76E17.2
ENSG00000232656	2.6514	up	6.24722e-10	IDI2-AS1
ENSG00000272223	2.65078	up	2.48395e-05	RP1-20C7.6
ENSG00000213133	2.65015	up	0.00682566	PPP1R14BP5
ENSG00000115850	2.64231	up	9.08733e-06	LCT
ENSG00000170476	2.6385	up	0.00295978	MZB1
ENSG00000228291	2.63506	up	0.0121903	RP11-445P17.6
ENSG00000164879	2.63305	up	0.00165168	CA3
ENSG00000154143	2.63	up	1.70834e-05	PANX3
ENSG00000273338	2.62811	up	7.18708e-08	RP11-386I14.4
ENSG00000127720	2.62684	up	4.12419e-09	METTL25
ENSG00000107736	2.62613	up	0.00997491	CDH23
ENSG00000166432	2.6218	up	0.0145776	ZMAT1
ENSG00000113805	2.61855	up	0.000970622	CNTN3
ENSG00000003989	2.61715	up	5.52421e-05	SLC7A2
ENSG00000184005	2.60976	up	0.000539298	ST6GALNAC3
ENSG00000231336	2.60938	up	0.012337	AC017006.3
ENSG00000174844	2.60914	up	0.00698723	DNAH12
ENSG00000171561	2.60815	up	0.00960616	OR2AT4
ENSG00000205449	2.60632	up	0.0155923	NBPF22P
ENSG00000049769	2.60354	up	0.00088593	PPP1R3F
ENSG00000185945	2.60292	up	3.63203e-06	NXF2B
ENSG00000255474	2.60168	up	0.0108111	RP11-234B24.2
ENSG00000172403	2.59472	up	0.010544	SYNPO2
ENSG00000253926	2.59364	up	0.0115194	RP11-26E5.1
ENSG00000248367	2.59162	up	0.00359457	CTB-129O4.1
ENSG00000099769	2.58388	up	0.00997988	IGFALS
ENSG00000214872	2.58168	up	2.59007e-05	SMTNL1
ENSG00000197181	2.57144	up	0.00217053	PIWIL2
ENSG00000251051	2.56707	up	0.00942212	ELL2P2
ENSG00000259151	2.56634	up	0.0159647	CAP2P1
ENSG00000130844	2.56389	up	8.61863e-08	ZNF331
ENSG00000265971	2.55683	up	0.00201911	RP11-269G24.6
ENSG00000203805	2.5562	up	2.08827e-12	PPAPDC1A
ENSG00000259786	2.553	up	9.21529e-19	CTD-2118P12.1
ENSG00000266971	2.54515	up	0.00225061	OR4F8P
ENSG00000227170	2.54401	up	0.0146778	AF178030.2
ENSG00000251364	2.53875	up	0.00661171	CTD-2516F10.2
ENSG00000251184	2.53676	up	0.000395902	RP11-101E3.5
ENSG00000244722	2.53411	up	0.000585163	RP11-179A18.1
ENSG00000162415	2.53296	up	3.95809e-07	ZSWIM5
ENSG00000102003	2.53188	up	2.75135e-11	SYP
ENSG00000106066	2.529	up	0.00154967	CPVL
ENSG00000271710	2.52837	up	0.00974458	RP11-312P12.3
ENSG00000174837	2.52757	up	0.000460016	EMR1
ENSG00000250616	2.52263	up	0.0102812	RP11-455F5.3
ENSG00000170965	2.52032	up	0.000145936	PLAC1
ENSG00000230836	2.51316	up	4.81006e-06	AC104135.4
ENSG00000101049	2.51174	up	0.00122968	SGK2
ENSG00000257410	2.51107	up	0.0121371	RP11-2H8.2
ENSG00000245571	2.50541	up	0.00482938	AP001258.4
ENSG00000102359	2.49757	up	1.33642e-09	SRPX2
ENSG00000232818	2.49507	up	0.00192176	RPS2P32
ENSG00000230366	2.49282	up	0.0133907	DSCR9
ENSG00000139890	2.4917	up	0.0126453	REM2
ENSG00000188779	2.48223	up	0.00453722	SKOR1
ENSG00000231244	2.4808	up	0.0102945	PSMC1P3
ENSG00000198883	2.48069	up	2.91676e-07	PNMA5
ENSG00000269106	2.47927	up	0.0112532	CTD-2619J13.23
ENSG00000179083	2.47717	up	4.05952e-10	FAM133A
ENSG00000142405	2.47598	up	0.00755586	NLRP12
ENSG00000251478	2.47022	up	0.00111957	CTD-2122P11.1
ENSG00000273419	2.46794	up	0.00128319	RP4-751H13.7
ENSG00000262791	2.45748	up	0.00362255	RP11-961A15.1
ENSG00000143552	2.45309	up	0.000174649	NUP210L
ENSG00000207742	2.45089	up	0.00971634	MIR382
ENSG00000153132	2.44466	up	8.82249e-08	CLGN
ENSG00000237880	2.44034	up	0.00384418	AC096669.2
ENSG00000182022	2.44018	up	1.45624e-05	CHST15
ENSG00000157542	2.43826	up	1.76793e-08	KCNJ6
ENSG00000115423	2.43731	up	8.02502e-07	DNAH6
ENSG00000215795	2.43614	up	0.00610981	RP11-488L18.3
ENSG00000266441	2.43508	up	0.00845946	RP11-91I8.3
ENSG00000232117	2.42909	up	0.002342	LINC00384
ENSG00000254409	2.42656	up	0.0154709	RP11-613D13.4
ENSG00000261095	2.42571	up	0.0141054	RP11-899L11.1
ENSG00000240003	2.42425	up	0.00720711	CTD-2015H6.1
ENSG00000229645	2.42183	up	0.000741253	LINC00341
ENSG00000250838	2.4183	up	5.38129e-06	RP11-501C14.5
ENSG00000267646	2.41156	up	0.00426737	CTC-499B15.7
ENSG00000232379	2.40898	up	0.0114337	RP11-308D16.1
ENSG00000134007	2.40642	up	0.000173907	ADAM20
ENSG00000250669	2.40605	up	0.0140077	RP11-83M16.3
ENSG00000267565	2.40593	up	0.0128655	CTC-559E9.8
ENSG00000230415	2.40583	up	0.0123947	RP5-902P8.10
ENSG00000227300	2.40457	up	0.00652996	KRT16P2
ENSG00000248663	2.40236	up	0.00032623	LINC00992
ENSG00000177599	2.40096	up	0.000171461	ZNF491
ENSG00000132274	2.39992	up	1.17779e-10	TRIM22
ENSG00000242575	2.39948	up	0.00506964	AC012501.3
ENSG00000197067	2.39912	up	0.00990278	OR2T32P
ENSG00000132530	2.39498	up	0.0141534	XAF1
ENSG00000237517	2.3919	up	0.0120652	DGCR5
ENSG00000162692	2.39073	up	0.00844905	VCAM1
ENSG00000242828	2.38673	up	0.000473498	RP11-47P18.1
ENSG00000261533	2.38543	up	0.000260751	RP11-15N24.4
ENSG00000256628	2.38532	up	2.98724e-14	ZBTB11-AS1
ENSG00000164604	2.38321	up	6.37264e-05	GPR85
ENSG00000178718	2.38159	up	7.50177e-33	RPP25
ENSG00000152208	2.38134	up	1.01271e-07	GRID2
ENSG00000136531	2.38008	up	0.0111693	SCN2A
ENSG00000080166	2.37835	up	0.000369608	DCT
ENSG00000254767	2.37218	up	0.00635451	OR2AL1P
ENSG00000185448	2.36844	up	0.00200048	FAM47A
ENSG00000260555	2.36787	up	0.000575785	RP11-728K20.2
ENSG00000257855	2.36767	up	0.00715985	RP11-629O19.1
ENSG00000259306	2.358	up	0.00348928	RP11-108K3.2
ENSG00000260918	2.35756	up	0.00444048	RP11-731J8.2
ENSG00000272745	2.35627	up	0.00352178	RP5-1007H16.1
ENSG00000272304	2.35489	up	0.00718656	RP11-19C24.1
ENSG00000168952	2.35287	up	8.93148e-17	STXBP6
ENSG00000241560	2.35169	up	0.015735	ZBTB20-AS1
ENSG00000218424	2.35089	up	0.0043995	NDUFS5P1
ENSG00000105472	2.3495	up	0.00867592	CLEC11A
ENSG00000160318	2.3485	up	0.00985724	CLDND2
ENSG00000273165	2.34637	up	0.00206373	RP11-1057B6.1
ENSG00000255509	2.34198	up	0.00352178	RP11-445F12.1
ENSG00000248443	2.33519	up	0.00452359	RP11-284A20.3
ENSG00000167555	2.33432	up	4.62985e-20	ZNF528
ENSG00000228167	2.33414	up	4.34452e-05	RP11-489C13.1
ENSG00000224897	2.33203	up	0.000512122	RP11-3B12.1
ENSG00000227541	2.32811	up	0.00177551	RP3-525N14.2
ENSG00000232439	2.32663	up	0.0136545	RPL18AP7
ENSG00000261597	2.32227	up	0.000550876	RP11-353B9.1
ENSG00000242770	2.31949	up	0.010626	RP11-180K7.1
ENSG00000267313	2.30448	up	0.0118091	RP11-142I20.1
ENSG00000223727	2.30441	up	0.00657779	AC026188.1
ENSG00000121552	2.30165	up	0.0131189	CSTA
ENSG00000241073	2.30048	up	0.0106242	RP4-714D9.2
ENSG00000224357	2.30015	up	0.00423933	ATG3P1
ENSG00000225779	2.29998	up	0.00904618	RP4-603I14.3
ENSG00000167383	2.29584	up	3.9163e-05	ZNF229
ENSG00000165959	2.2937	up	0.00159842	CLMN
ENSG00000213412	2.29045	up	0.00885523	HNRNPA1P33
ENSG00000186205	2.28898	up	9.03246e-11	2016-03-01
ENSG00000248456	2.28636	up	0.00919188	RP11-553P9.3
ENSG00000266118	2.27872	up	0.000614974	RP11-507M3.1
ENSG00000075073	2.27389	up	0.0142127	TACR2
ENSG00000250796	2.27176	up	0.0105863	RP11-723O4.3
ENSG00000261071	2.2694	up	0.00208031	RP1-223E5.4
ENSG00000187240	2.2693	up	1.04964e-16	DYNC2H1
ENSG00000186026	2.26916	up	0.000174548	ZNF284
ENSG00000272800	2.26671	up	0.000906052	RP11-438L19.1
ENSG00000211959	2.26473	up	0.00708768	IGHV4-39
ENSG00000151164	2.26376	up	1.57698e-05	RAD9B
ENSG00000272008	2.25677	up	0.00628701	RP11-393I2.4
ENSG00000117791	2.24734	up	1.3e-44	2016-03-02
ENSG00000173966	2.24513	up	0.0130668	RP11-18M17.1
ENSG00000176485	2.24365	up	0.00190297	PLA2G16
ENSG00000143341	2.24291	up	0.00329561	HMCN1
ENSG00000138772	2.24084	up	1.5716e-26	ANXA3
ENSG00000260725	2.23911	up	7.28654e-06	AC005307.1
ENSG00000060140	2.23549	up	0.0117639	STYK1
ENSG00000242520	2.23289	up	0.00763866	MAGEA5
ENSG00000265093	2.23114	up	0.0104777	RN7SL246P
ENSG00000162366	2.22371	up	0.0101158	PDZK1IP1
ENSG00000236452	2.22337	up	0.000237783	AC123023.1
ENSG00000204767	2.2224	up	5.04419e-05	FAM196B
ENSG00000223573	2.22105	up	0.000504813	TINCR
ENSG00000106258	2.21863	up	0	CYP3A5
ENSG00000154874	2.21664	up	0.00170233	CCDC144B
ENSG00000070190	2.21615	up	3.85249e-08	DAPP1
ENSG00000104783	2.21382	up	8.11878e-09	KCNN4
ENSG00000235726	2.21309	up	0.000583561	AC010148.1
ENSG00000260778	2.21183	up	0.011642	MIR940
ENSG00000223609	2.20875	up	3.52033e-05	HBD
ENSG00000147576	2.20653	up	0.0028753	ADHFE1
ENSG00000213917	2.20528	up	0.00712512	RPL5P8
ENSG00000267032	2.20528	up	0.00352178	RP11-807E13.2
ENSG00000169136	2.20486	up	0	ATF5
ENSG00000272128	2.19964	up	0.0157479	KB-1836B5.4
ENSG00000160094	2.19865	up	0.00239139	ZNF362
ENSG00000169403	2.19506	up	0.0137324	PTAFR
ENSG00000171189	2.19452	up	6.79568e-07	GRIK1
ENSG00000000003	2.18881	up	2.47305e-07	TSPAN6
ENSG00000117480	2.18804	up	1.46666e-08	FAAH
ENSG00000240244	2.18677	up	0.00649419	GAPDHP33
ENSG00000271527	2.1741	up	0.00712512	RP11-7G12.2
ENSG00000248118	2.1741	up	0.00712512	LINC01019
ENSG00000196814	2.1741	up	0.00712512	MVB12B
ENSG00000236021	2.17302	up	0.0127768	RP11-195C7.1
ENSG00000267838	2.17062	up	0.00364077	AC008746.12
ENSG00000117595	2.16896	up	0.00361403	IRF6
ENSG00000154479	2.16767	up	1.70645e-06	CCDC173
ENSG00000262370	2.16756	up	0.00397292	RP11-473M20.9
ENSG00000141338	2.16397	up	3.55299e-06	ABCA8
ENSG00000261617	2.16014	up	0.00041244	RP11-243A14.1
ENSG00000128815	2.15867	up	0.00496307	WDFY4
ENSG00000267327	2.15747	up	0.00795374	CTD-2008L17.1
ENSG00000216378	2.15713	up	0.0044166	RP3-344J20.1
ENSG00000232686	2.15242	up	0.00364045	ARID4B-IT1
ENSG00000156042	2.14873	up	1.03915e-27	TTC18
ENSG00000159905	2.14464	up	1.18185e-05	ZNF221
ENSG00000224568	2.14026	up	0.00861928	AC096669.3
ENSG00000201699	2.13757	up	0.00969752	RNU1-59P
ENSG00000217315	2.13538	up	0.00427881	OR2W2P
ENSG00000177455	2.13468	up	0.00229019	CD19
ENSG00000132359	2.13443	up	4.72097e-06	RAP1GAP2
ENSG00000167419	2.12998	up	0.00933668	LPO
ENSG00000246090	2.12974	up	7.88885e-09	RP11-696N14.1
ENSG00000263280	2.12487	up	0.000301306	LA16c-325D7.2
ENSG00000185955	2.12128	up	0.00784853	C7orf61
ENSG00000242337	2.12034	up	0.00510646	TFP1
ENSG00000261840	2.11705	up	0.000676258	RP11-146F11.1
ENSG00000254012	2.11214	up	9.15827e-05	RP11-546B8.5
ENSG00000074966	2.11163	up	1.67713e-18	TXK
ENSG00000189295	2.11067	up	0.00494026	ANKRD62P1-PARP4P3
ENSG00000163285	2.10871	up	3.35957e-05	GABRG1
ENSG00000223505	2.10689	up	0.00416594	RP11-397P13.7
ENSG00000153802	2.10651	up	2.72353e-09	TMPRSS11D
ENSG00000225434	2.10095	up	0.0140914	RP11-63P12.6
ENSG00000234745	2.0961	up	0.00300296	HLA-B
ENSG00000090776	2.095	up	0.0106195	EFNB1
ENSG00000150045	2.09246	up	0.00803326	KLRF1
ENSG00000270430	2.09016	up	6.64479e-10	RP11-42L13.3
ENSG00000270558	2.0862	up	0.00357189	CTD-2124B8.2
ENSG00000251188	2.08292	up	0.00796366	RP11-478C6.6
ENSG00000224358	2.07961	up	1.30192e-06	RP11-466F5.8
ENSG00000152689	2.07896	up	7.41732e-16	RASGRP3
ENSG00000253559	2.07787	up	0.00261804	OSGEPL1-AS1
ENSG00000259167	2.07524	up	0.00712512	NMNAT1P1
ENSG00000223704	2.07417	up	4.26556e-05	RP1-90L6.2
ENSG00000062370	2.07167	up	1.6272e-09	ZNF112
ENSG00000213626	2.06818	up	0.00412306	LBH
ENSG00000244480	2.06668	up	0.000115226	AC005154.7
ENSG00000132832	2.06567	up	0.00482693	RP11-445H22.3
ENSG00000253837	2.06426	up	0.0108151	RP11-177H13.2
ENSG00000132205	2.06311	up	4.09014e-06	EMILIN2
ENSG00000227113	2.06099	up	0.0139561	RP11-460N20.4
ENSG00000188517	2.06031	up	0.000835793	COL25A1
ENSG00000260773	2.0559	up	0.000523319	RP11-352G18.2
ENSG00000170160	2.0552	up	0.00119529	CCDC144A
ENSG00000015285	2.05344	up	0.00197918	WAS
ENSG00000157766	2.05306	up	0.00597427	ACAN
ENSG00000205413	2.0517	up	2.18917e-23	SAMD9
ENSG00000235869	2.05059	up	0.00961583	RP1-102G20.4
ENSG00000184613	2.04639	up	0.000189761	NELL2
ENSG00000226320	2.04565	up	0.00018607	AC018359.1
ENSG00000163531	2.04441	up	1.4e-45	NFASC
ENSG00000115353	2.04436	up	0.00526948	TACR1
ENSG00000134909	2.04435	up	0.00638033	ARHGAP32
ENSG00000243601	2.04193	up	0.0161175	RP11-152P17.1
ENSG00000247193	2.0419	up	0.0147132	RP11-431M7.3
ENSG00000220785	2.03809	up	0.00236042	MTMR9LP
ENSG00000259877	2.03731	up	7.17761e-09	RP11-46C24.7
ENSG00000270524	2.03688	up	2.54428e-16	QTRT1P1
ENSG00000270039	2.03388	up	0.00307385	RP11-571M6.17
ENSG00000231674	2.03359	up	0.00135744	LINC00410
ENSG00000250802	2.03325	up	0.0151973	ZBED3-AS1
ENSG00000245662	2.03082	up	0.00957789	RP11-184E9.1
ENSG00000218596	2.02974	up	0.00680968	RP11-2J18.1
ENSG00000075884	2.02721	up	8.79381e-06	ARHGAP15
ENSG00000174963	2.02649	up	0.00542071	ZIC4
ENSG00000225361	2.02459	up	9.82545e-09	PPP1R26-AS1
ENSG00000253309	2.02237	up	1.0804e-06	SERPINE3
ENSG00000267022	2.02111	up	0.00325986	ZNF223
ENSG00000269225	2.02082	up	0.00510968	RP11-15E1.3
ENSG00000215093	2.02028	up	0.000443216	EEF1A1P29
ENSG00000152377	2.02023	up	0.000319907	SPOCK1
ENSG00000269026	2.01988	up	2.74383e-05	AC003006.7
ENSG00000158163	2.01755	up	0.00150014	DZIP1L
ENSG00000113749	2.01678	up	0.00826456	HRH2
ENSG00000217783	2.01656	up	0.00345065	LDHAL6FP
ENSG00000078328	2.01594	up	1.97428e-05	RBFOX1
ENSG00000251441	2.01567	up	0.0025254	RTEL1P1
ENSG00000250803	2.01272	up	0.0101346	CTC-441N14.4
ENSG00000254646	2.01158	up	1.6271e-06	OR8B10P
ENSG00000166313	2.0106	up	6.55481e-11	APBB1
ENSG00000249378	2.00749	up	0.0103243	LINC01060
ENSG00000262154	2.00402	up	0.0161596	LA16c-352F10.1
ENSG00000152767	2.00219	up	1.60629e-08	FARP1
ENSG00000164010	2.00149	up	0	ERMAP
ENSG00000170011	1.99887	up	0.0121884	MYRIP
ENSG00000220541	1.99883	up	0.00121706	RP5-1170D6.1
ENSG00000260382	1.9988	up	0.00617132	RP11-540B6.2
ENSG00000187676	1.99659	up	9.54582e-11	B3GALTL
ENSG00000130997	1.9965	up	9.20549e-17	POLN
ENSG00000253420	1.9965	up	0.00286681	RP11-642D21.2
ENSG00000168918	1.99544	up	4.97247e-05	INPP5D
ENSG00000102683	1.99365	up	0.00729531	SGCG
ENSG00000271020	1.99316	up	0.015997	RP11-10C24.1
ENSG00000183044	1.99262	up	7.0115e-09	ABAT
ENSG00000261584	1.99257	up	6.40359e-06	RP11-457M11.5
ENSG00000064201	1.99138	up	9.93663e-09	TSPAN32
ENSG00000176746	1.99035	up	0.000152037	MAGEB6
ENSG00000248115	1.98979	up	0.00358299	RP11-752D24.2
ENSG00000249226	1.98836	up	8.5287e-17	SUCLG2P4
ENSG00000250371	1.98672	up	0.0100154	RP11-22A3.2
ENSG00000268521	1.98499	up	0.00339984	VN1R83P
ENSG00000225264	1.98143	up	0.00035509	ZNRF2P2
ENSG00000139209	1.97726	up	0.00289969	SLC38A4
ENSG00000225422	1.97649	up	0.0159308	RBMS1P1
ENSG00000239440	1.9753	up	0.014802	RP11-260O18.1
ENSG00000265102	1.97254	up	0.0142343	MIR3942
ENSG00000266736	1.96842	up	0.00096946	RP11-260A9.4
ENSG00000228623	1.96249	up	8.58412e-13	ZNF883
ENSG00000129116	1.96199	up	1.04004e-06	PALLD
ENSG00000272373	1.96172	up	6.96733e-09	ZNF33B
ENSG00000270332	1.96061	up	0.0123931	RP11-82L2.1
ENSG00000205359	1.95874	up	0.00462732	SLCO6A1
ENSG00000231770	1.9562	up	2.62566e-05	TMEM44-AS1
ENSG00000259527	1.95403	up	0.000178663	LINC00052
ENSG00000269001	1.95223	up	0.00230075	ZNF818P
ENSG00000198440	1.95119	up	9.5062e-06	ZNF583
ENSG00000255126	1.94936	up	0.00262515	CTD-2531D15.5
ENSG00000123584	1.94789	up	1.44718e-05	MAGEA9B
ENSG00000184635	1.94745	up	4.95238e-08	ZNF93
ENSG00000206530	1.94713	up	2.02791e-18	WDR52
ENSG00000148488	1.9437	up	1.41464e-34	ST8SIA6
ENSG00000267508	1.9435	up	0.0136049	ZNF285
ENSG00000273253	1.94295	up	0.00542951	RP3-402G11.26
ENSG00000200269	1.94219	up	0.0110314	RNU6-838P
ENSG00000058091	1.94144	up	0.00162653	CDK14
ENSG00000166008	1.93885	up	1.67195e-05	MAGEA9
ENSG00000230043	1.93455	up	6.24301e-18	TMSB4XP6
ENSG00000121413	1.93334	up	1.78621e-09	ZSCAN18
ENSG00000237697	1.92649	up	0.00712512	LINC00312
ENSG00000218819	1.92649	up	0.0144152	TDRD15
ENSG00000239872	1.92649	up	0.0144152	RPL35AP19
ENSG00000260209	1.92649	up	0.0144152	RP11-680F20.10
ENSG00000116667	1.92649	up	0.0144152	C1orf21
ENSG00000048540	1.92585	up	0.000838238	LMO3
ENSG00000182583	1.92259	up	0.00682881	VCX
ENSG00000198155	1.91993	up	0.00180721	ZNF876P
ENSG00000110900	1.91181	up	0.0144152	TSPAN11
ENSG00000066629	1.91181	up	0.00712512	EML1
ENSG00000239265	1.91181	up	0.0144152	CLRN1-AS1
ENSG00000124196	1.91181	up	0.0144152	GTSF1L
ENSG00000197959	1.9115	up	3.68044e-06	DNM3
ENSG00000197697	1.9113	up	3.59806e-05	HIST1H2BE
ENSG00000146856	1.91119	up	4.79138e-08	AGBL3
ENSG00000269624	1.91027	up	0.0154361	AL138847.1
ENSG00000107611	1.90845	up	4.46272e-14	CUBN
ENSG00000224640	1.90102	up	0.000652539	SRSF1P1
ENSG00000135749	1.90075	up	6.7388e-05	PCNXL2
ENSG00000177138	1.90064	up	4.96775e-05	FAM9B
ENSG00000142910	1.89947	up	9.57342e-05	TINAGL1
ENSG00000204967	1.89925	up	0.0144152	PCDHA4
ENSG00000255347	1.89925	up	0.0144152	RP11-40H19.1
ENSG00000257800	1.8992	up	1.81534e-11	FNBP1P1
ENSG00000083844	1.89915	up	1.69347e-09	ZNF264
ENSG00000162877	1.89813	up	0.0120642	PM20D1
ENSG00000231842	1.89777	up	0.00347809	RP11-527F13.1
ENSG00000230606	1.89585	up	0.00371091	AC159540.1
ENSG00000236204	1.8941	up	0.000997302	AC092594.1
ENSG00000163629	1.893	up	0.014685	PTPN13
ENSG00000249694	1.89255	up	0.00697282	RP11-378A12.1
ENSG00000183091	1.88954	up	0	NEB
ENSG00000117148	1.88929	up	5.42499e-05	ACTL8
ENSG00000250421	1.88578	up	0.00883436	RP11-83M16.6
ENSG00000102575	1.88418	up	2.182e-42	ACP5
ENSG00000228803	1.88324	up	0.00138786	AC073072.6
ENSG00000225180	1.8804	up	0.00228087	AATK-AS1
ENSG00000179222	1.88017	up	5.11651e-12	MAGED1
ENSG00000273355	1.87926	up	0.0122759	RP11-672L10.6
ENSG00000224895	1.8781	up	0.00860544	VPS26BP1
ENSG00000132623	1.87726	up	2.92914e-13	ANKEF1
ENSG00000185404	1.8724	up	3.7307e-16	SP140L
ENSG00000229972	1.87017	up	0.0144152	IQCF3
ENSG00000232795	1.87017	up	0.0144152	SCAND3P1
ENSG00000237428	1.87017	up	0.0144152	LL22NC03-22A12.9
ENSG00000256383	1.87017	up	0.0144152	AC020910.2
ENSG00000272644	1.86862	up	0.00939759	RP11-33O4.1
ENSG00000147174	1.86797	up	4.44565e-11	ACRC
ENSG00000250016	1.86223	up	2.90283e-06	SNX18P23
ENSG00000126752	1.85892	up	1.10986e-08	SSX1
ENSG00000148291	1.85688	up	2.9692e-12	SURF2
ENSG00000137801	1.84879	up	1.92496e-37	THBS1
ENSG00000198416	1.84824	up	0.0138472	CTD-2173L22.4
ENSG00000129646	1.84746	up	2.4865e-14	QRICH2
ENSG00000064989	1.84679	up	0.00268665	CALCRL
ENSG00000174564	1.84612	up	3.29359e-13	IL20RB
ENSG00000253621	1.84523	up	0.0152399	RP11-255L13.1
ENSG00000222724	1.84392	up	0.00158719	RNU2-63P
ENSG00000204934	1.84171	up	0.0141891	ATP6V0E2-AS1
ENSG00000254162	1.83774	up	0.0155343	RP11-48B3.3
ENSG00000196878	1.83231	up	0.000205134	LAMB3
ENSG00000129151	1.83129	up	0.000212239	BBOX1
ENSG00000101892	1.83056	up	9.34245e-29	ATP1B4
ENSG00000241219	1.82807	up	0.00439298	RP11-572M11.1
ENSG00000170180	1.82729	up	0	GYPA
ENSG00000168497	1.82666	up	0.000133707	SDPR
ENSG00000155629	1.82532	up	4.89955e-10	PIK3AP1
ENSG00000175928	1.8249	up	0.0101255	LRRN1
ENSG00000249825	1.82394	up	0.0112228	CTD-2201I18.1
ENSG00000250361	1.81942	up	0	GYPB
ENSG00000255993	1.81867	up	0.000677076	PSMC1P9
ENSG00000261211	1.81497	up	3.59565e-05	RP1-80N2.3
ENSG00000207220	1.81489	up	0.000348478	RNU1-57P
ENSG00000170006	1.81298	up	2.48285e-10	TMEM154
ENSG00000267213	1.81205	up	0.0137644	AC007773.2
ENSG00000254185	1.8081	up	0.0128774	RP11-419L20.2
ENSG00000177788	1.8055	up	4.42732e-07	RP5-1061H20.4
ENSG00000248231	1.80371	up	0.0122212	KRT8P4
ENSG00000129295	1.80139	up	0.00760559	LRRC6
ENSG00000257764	1.79746	up	0.000100011	RP11-1143G9.4
ENSG00000224512	1.79623	up	0.0112435	AC021593.1
ENSG00000151150	1.79526	up	5.73927e-07	ANK3
ENSG00000198948	1.79338	up	0.012517	MFAP3L
ENSG00000251193	1.79099	up	0.0127784	RP11-72K17.1
ENSG00000099256	1.7909	up	4.39468e-17	PRTFDC1
ENSG00000039139	1.79082	up	0.00478234	DNAH5
ENSG00000261268	1.7893	up	0.00753311	RP11-308D13.3
ENSG00000164128	1.7893	up	0.0144152	NPY1R
ENSG00000185821	1.78811	up	0.00664562	OR6C76
ENSG00000228933	1.78271	up	0.00447103	RP11-268G12.1
ENSG00000207858	1.78206	up	3.74727e-05	MIR622
ENSG00000160185	1.78102	up	1.46596e-05	UBASH3A
ENSG00000247982	1.78064	up	0.00160251	LINC00926
ENSG00000175183	1.78021	up	0.00180302	CSRP2
ENSG00000233338	1.77978	up	0.010083	TLR8-AS1
ENSG00000230882	1.77885	up	0.00348928	AC005077.14
ENSG00000188153	1.77854	up	6.0277e-13	COL4A5
ENSG00000143107	1.77755	up	0.00949774	FNDC7
ENSG00000164756	1.77703	up	0.00433305	SLC30A8
ENSG00000187054	1.77655	up	0.0125622	TMPRSS11A
ENSG00000111339	1.77581	up	3.72728e-05	ART4
ENSG00000232880	1.77275	up	0.00602992	RP3-453C12.8
ENSG00000185090	1.76887	up	0.000385232	MANEAL
ENSG00000180353	1.76828	up	4.49047e-05	HCLS1
ENSG00000260400	1.76577	up	0.0117913	RP11-119F7.5
ENSG00000237027	1.76515	up	0.0144248	RP11-16C18.3
ENSG00000163376	1.76501	up	1.439e-42	KBTBD8
ENSG00000158578	1.76454	up	0	ALAS2
ENSG00000111816	1.76442	up	0.000326365	FRK
ENSG00000152926	1.76295	up	0	ZNF117
ENSG00000196693	1.76121	up	0	ZNF33B
ENSG00000189369	1.759	up	5.83422e-06	GSPT2
ENSG00000021826	1.75716	up	0	CPS1
ENSG00000161912	1.75649	up	0.0042243	ADCY10P1
ENSG00000185010	1.75536	up	0.00111425	F8
ENSG00000170264	1.75505	up	0.000696795	FAM161A
ENSG00000234593	1.75274	up	0.00239896	RP4-704D23.1
ENSG00000261604	1.75208	up	6.12769e-06	CTD-2636A23.2
ENSG00000269905	1.75191	up	1.58379e-06	RP11-271K21.11
ENSG00000237560	1.75069	up	0.00655197	AC004562.1
ENSG00000235890	1.75039	up	0.0107144	TSPEAR-AS1
ENSG00000205702	1.75014	up	0.000632595	CYP2D7P1
ENSG00000104427	1.74945	up	0.000554117	ZC2HC1A
ENSG00000253945	1.74886	up	0.00186938	RP11-328L11.1
ENSG00000213199	1.74698	up	0.00233943	ASIC3
ENSG00000134627	1.74554	up	1.32187e-05	PIWIL4
ENSG00000228192	1.74451	up	1.17579e-06	RP11-342M1.3
ENSG00000269963	1.74252	up	0.000620976	RP11-73M18.9
ENSG00000229800	1.73991	up	5.38589e-05	ATP8A2P2
ENSG00000197497	1.73912	up	0.00142551	ZNF665
ENSG00000258128	1.7373	up	2.63559e-09	MKRN9P
ENSG00000267248	1.73625	up	0.0111846	CTD-2319I12.4
ENSG00000242522	1.73495	up	0.0153901	KLHL6-AS1
ENSG00000005882	1.73371	up	0.000745866	PDK2
ENSG00000228889	1.73369	up	0.0025289	UBAC2-AS1
ENSG00000239374	1.73335	up	0.00701354	RP11-407P2.1
ENSG00000158301	1.73155	up	0.00174567	GPRASP2
ENSG00000234352	1.73113	up	0.00205179	hsa-mir-490
ENSG00000152582	1.72892	up	1.40849e-06	SPEF2
ENSG00000241923	1.7287	up	0.00379854	RP11-425I13.1
ENSG00000182195	1.72559	up	0.0144152	LDOC1
ENSG00000182912	1.72483	up	0.00340979	C21orf90
ENSG00000170927	1.72397	up	4.93965e-07	PKHD1
ENSG00000264570	1.72395	up	0.00941903	SNX19P3
ENSG00000169758	1.723	up	0.00952349	C15orf27
ENSG00000265393	1.72295	up	0.0160523	CTD-2517M22.17
ENSG00000036448	1.71965	up	0.0132845	MYOM2
ENSG00000257951	1.7163	up	0.00994841	RP11-554D14.4
ENSG00000221883	1.71503	up	0.00344438	ARIH2OS
ENSG00000104324	1.71451	up	7.4195e-41	CPQ
ENSG00000264052	1.71449	up	0.00377831	MIR3655
ENSG00000242067	1.7138	up	0.000265951	RPL9P28
ENSG00000232093	1.7134	up	0.00244916	RP11-307C12.11
ENSG00000267459	1.71324	up	0.0128286	AC006116.27
ENSG00000159899	1.71213	up	1.288e-07	NPR2
ENSG00000156150	1.71129	up	0.0101602	ALX3
ENSG00000077616	1.71117	up	0.00027711	NAALAD2
ENSG00000255782	1.70829	up	0.00774625	Z83840.1
ENSG00000226971	1.70777	up	3.21875e-05	AF196972.4
ENSG00000271914	1.70695	up	0.014667	RP4-789D17.5
ENSG00000138821	1.70371	up	0	SLC39A8
ENSG00000267010	1.70213	up	2.5421e-07	RP11-108P20.1
ENSG00000152910	1.7016	up	5.50295e-06	CNTNAP4
ENSG00000254937	1.70153	up	0.00686306	RP11-728D14.6
ENSG00000251381	1.70138	up	0	LINC00958
ENSG00000140015	1.70061	up	1.97363e-05	KCNH5
ENSG00000105991	1.70027	up	0.0018541	HOXA1
ENSG00000226306	1.70009	up	0.00220379	NPY6R
ENSG00000235592	1.70001	up	0.00140604	GS1-600G8.4
ENSG00000134508	1.69922	up	2.14611e-05	CABLES1
ENSG00000119681	1.69778	up	0.0110921	LTBP2
ENSG00000213462	1.69684	up	0	ERV3-1
ENSG00000128656	1.69595	up	0.00856664	CHN1
ENSG00000198908	1.69107	up	0.000103873	BHLHB9
ENSG00000166750	1.69081	up	0.00113721	SLFN5
ENSG00000134326	1.6901	up	0	CMPK2
ENSG00000212743	1.68877	up	0.0121481	DKFZP667F0711
ENSG00000184949	1.68806	up	0.00200264	FAM227A
ENSG00000148057	1.68755	up	0.000544239	IDNK
ENSG00000136161	1.68635	up	0.000146124	RCBTB2
ENSG00000123689	1.6854	up	4.12418e-14	G0S2
ENSG00000206531	1.68525	up	0.0143278	CD200R1L
ENSG00000226258	1.68456	up	0.000512935	GRM7-AS3
ENSG00000231552	1.68406	up	0.00286306	IGBP1P3
ENSG00000228626	1.68071	up	0.000586795	RP11-495P10.9
ENSG00000224430	1.67961	up	0.0110447	MKRN5P
ENSG00000113966	1.67939	up	0.000197496	ARL6
ENSG00000162669	1.6785	up	1.72505e-19	HFM1
ENSG00000123612	1.6785	up	0.0122105	ACVR1C
ENSG00000220937	1.67843	up	0.00562355	HNRNPA1P41
ENSG00000196275	1.67764	up	4.58118e-11	GTF2IRD2
ENSG00000119917	1.67405	up	7.78795e-07	IFIT3
ENSG00000170049	1.67373	up	0.00179099	KCNAB3
ENSG00000121064	1.6731	up	6.92701e-11	SCPEP1
ENSG00000273148	1.67296	up	0.00680941	RP5-1068E13.7
ENSG00000264448	1.67274	up	0.0144152	MIR378D2
ENSG00000007376	1.67026	up	5.00847e-13	RPUSD1
ENSG00000254336	1.66985	up	0.00197088	AC008694.2
ENSG00000231196	1.66974	up	9.39052e-05	RP11-495P10.8
ENSG00000166863	1.66788	up	5.46914e-05	TAC3
ENSG00000110665	1.66595	up	0.000190977	C11orf21
ENSG00000251600	1.66544	up	0.00819971	RP11-673E1.1
ENSG00000249668	1.66446	up	0.00776639	KRT18P56
ENSG00000260103	1.66434	up	7.41053e-06	RP11-10O17.1
ENSG00000136828	1.66245	up	0.00064727	RALGPS1
ENSG00000146426	1.66067	up	3.18181e-17	TIAM2
ENSG00000258690	1.66043	up	0.0146032	RP11-81F13.1
ENSG00000224903	1.65808	up	0.00421812	AC005534.8
ENSG00000120215	1.65595	up	0.00910346	MLANA
ENSG00000243696	1.65518	up	0.00254584	RP5-966M1.6
ENSG00000260809	1.65491	up	0.0137405	CTD-2144E22.10
ENSG00000269621	1.65389	up	1.85998e-06	RP11-98D18.15
ENSG00000150773	1.65322	up	0.00491488	PIH1D2
ENSG00000171208	1.65303	up	2.88081e-19	NETO2
ENSG00000169291	1.65295	up	0.0162126	SHE
ENSG00000230721	1.65255	up	0.00284012	RP4-612B15.2
ENSG00000188171	1.65171	up	0.00021516	ZNF626
ENSG00000259753	1.65073	up	0.00167505	ITGB3
ENSG00000165409	1.64886	up	0.00230272	TSHR
ENSG00000197872	1.64871	up	1.54813e-05	FAM49A
ENSG00000196208	1.64724	up	0.00178429	GREB1
ENSG00000228071	1.64619	up	0.00131672	RPL7P47
ENSG00000198932	1.64486	up	6.02246e-11	GPRASP1
ENSG00000136546	1.64387	up	0.00993573	SCN7A
ENSG00000200783	1.64326	up	0.0129226	RN7SKP180
ENSG00000123364	1.64219	up	2.37844e-05	HOXC13
ENSG00000181322	1.64211	up	0.00102873	NME9
ENSG00000157950	1.6419	up	0.00024651	SSX2B
ENSG00000102053	1.64023	up	1.16678e-07	ZC3H12B
ENSG00000175048	1.63941	up	8.63963e-10	ZDHHC14
ENSG00000260949	1.63894	up	0.0027885	KB-1836B5.1
ENSG00000083857	1.63886	up	3.80758e-31	FAT1
ENSG00000175906	1.63807	up	0.0120019	ARL4D
ENSG00000031081	1.63789	up	0.00267949	ARHGAP31
ENSG00000165115	1.63747	up	1.56202e-05	KIF27
ENSG00000163359	1.63697	up	1.732e-13	COL6A3
ENSG00000251569	1.63696	up	0.00734524	RP11-724O16.1
ENSG00000128284	1.63571	up	0.0113342	APOL3
ENSG00000158486	1.63468	up	9.10072e-06	DNAH3
ENSG00000268117	1.63461	up	0.0075861	VN1R84P
ENSG00000123407	1.63394	up	7.4691e-05	HOXC12
ENSG00000167604	1.63136	up	0.00352687	NFKBID
ENSG00000134245	1.631	up	2.14135e-10	WNT2B
ENSG00000237440	1.63082	up	0.00408015	ZNF737
ENSG00000143119	1.63061	up	7.66379e-39	CD53
ENSG00000115604	1.63012	up	9.2354e-15	IL18R1
ENSG00000184906	1.62969	up	8.82742e-05	AC129778.2
ENSG00000262503	1.62879	up	0.00384518	RP11-530N7.2
ENSG00000261697	1.62669	up	0.00371333	RP11-178L8.5
ENSG00000255048	1.62378	up	0.0027351	OR8X1P
ENSG00000181072	1.62242	up	0.00320216	CHRM2
ENSG00000228106	1.62195	up	0.00065256	RP11-452F19.3
ENSG00000072182	1.61843	up	2.72766e-28	ASIC4
ENSG00000128567	1.6174	up	1.17532e-35	PODXL
ENSG00000248483	1.61452	up	4.43926e-05	POU5F2
ENSG00000255757	1.61391	up	0.00189912	RP11-749H20.3
ENSG00000175161	1.61274	up	0.00453949	CADM2
ENSG00000238003	1.61221	up	0.00552161	RP11-465N4.2
ENSG00000172175	1.61208	up	0	MALT1
ENSG00000214107	1.61157	up	3.04157e-17	MAGEB1
ENSG00000258773	1.61098	up	0.00244814	RP11-255M2.2
ENSG00000048342	1.61001	up	5.44676e-11	CC2D2A
ENSG00000197355	1.60981	up	4.71751e-05	UAP1L1
ENSG00000088756	1.60695	up	1.26862e-08	ARHGAP28
ENSG00000108018	1.60341	up	1.62036e-35	SORCS1
ENSG00000235828	1.60243	up	0.00303016	RPL36AP26
ENSG00000130656	1.60206	up	1.89761e-17	HBZ
ENSG00000164741	1.60173	up	6.32079e-07	DLC1
ENSG00000167384	1.60151	up	3.75408e-12	ZNF180
ENSG00000267343	1.60009	up	0.00928467	CTC-499B15.4
ENSG00000196427	1.59926	up	7.98445e-06	NBPF4
ENSG00000162390	1.59724	up	0.00669076	ACOT11
ENSG00000184860	1.59633	up	0.000516823	SDR42E1
ENSG00000248828	1.59597	up	0.0118239	RP11-673E1.4
ENSG00000166839	1.59492	up	0.00651903	ANKDD1A
ENSG00000152104	1.59379	up	0.0115348	PTPN14
ENSG00000268465	1.59307	up	0.000428569	CTC-273B12.7
ENSG00000271090	1.5919	up	0.000693243	AC012531.23
ENSG00000233057	1.59102	up	1.49906e-15	EEF1A1P14
ENSG00000271141	1.59009	up	0.00387552	RP11-171I2.4
ENSG00000135426	1.59007	up	8.00066e-05	TESPA1
ENSG00000183690	1.59004	up	1.2518e-06	EFHC2
ENSG00000238198	1.58982	up	0.00134468	RP11-31F15.2
ENSG00000179841	1.58962	up	0.00172701	AKAP5
ENSG00000179588	1.58827	up	1.80894e-05	ZFPM1
ENSG00000224082	1.58761	up	0.00152852	UBTFL8
ENSG00000176826	1.58745	up	3.2917e-06	FKBP9L
ENSG00000197993	1.58724	up	5.6e-45	KEL
ENSG00000211454	1.58677	up	0.0115594	AKR7L
ENSG00000164181	1.58559	up	6.09705e-28	ELOVL7
ENSG00000134516	1.5854	up	0	DOCK2
ENSG00000260423	1.58422	up	0.00254575	RP13-735L24.1
ENSG00000145743	1.58359	up	4.99487e-10	FBXL17
ENSG00000119865	1.58357	up	0.0042605	CNRIP1
ENSG00000264546	1.58353	up	0.00855427	RP11-464D20.6
ENSG00000198464	1.58241	up	1.60214e-26	ZNF480
ENSG00000206177	1.58157	up	5.05145e-05	HBM
ENSG00000224908	1.5808	up	0.00424586	TIMM8BP2
ENSG00000147044	1.58039	up	0.00641696	CASK
ENSG00000162620	1.57985	up	0.00104398	LRRIQ3
ENSG00000160298	1.5798	up	2.62741e-12	C21orf58
ENSG00000197208	1.57951	up	5.19919e-06	SLC22A4
ENSG00000203871	1.57804	up	0.000159213	C6orf164
ENSG00000137491	1.57727	up	1.89033e-05	SLCO2B1
ENSG00000256043	1.57584	up	0.000741769	CTSO
ENSG00000179097	1.57537	up	0.00141614	HTR1F
ENSG00000120669	1.5748	up	0.00699294	SOHLH2
ENSG00000206178	1.57465	up	0.000256265	HBZP1
ENSG00000264247	1.57403	up	3.83044e-10	LINC00909
ENSG00000214544	1.57331	up	0.00158377	GTF2IRD2P1
ENSG00000264920	1.57136	up	0.00553884	RP11-6N17.4
ENSG00000108622	1.56969	up	9.08206e-08	ICAM2
ENSG00000175764	1.56795	up	1.44644e-06	TTLL11
ENSG00000120675	1.56788	up	0.00408209	DNAJC15
ENSG00000229809	1.56606	up	0.000198425	ZNF688
ENSG00000112297	1.56593	up	2.24383e-27	AIM1
ENSG00000173406	1.5659	up	0.00194366	DAB1
ENSG00000187266	1.56468	up	4.02397e-05	EPOR
ENSG00000253636	1.56453	up	0.00897242	RP11-531A24.5
ENSG00000120318	1.56358	up	0.0134394	ARAP3
ENSG00000272831	1.56306	up	7.73959e-05	RP11-792A8.4
ENSG00000213938	1.56255	up	0.00403391	SEPHS1P6
ENSG00000242660	1.56206	up	7.86264e-05	RP11-1094M14.1
ENSG00000258111	1.56096	up	0.00208791	RP11-43D4.2
ENSG00000232931	1.56014	up	1.26794e-05	LINC00342
ENSG00000258613	1.55906	up	0.0103011	RPL21P7
ENSG00000176134	1.55845	up	0.000423897	AL445665.1
ENSG00000176912	1.5559	up	0.00132981	C18orf56
ENSG00000151320	1.55553	up	2.54793e-07	AKAP6
ENSG00000177548	1.55479	up	0.000232802	RABEP2
ENSG00000241721	1.55441	up	0.00110362	SUMO1P1
ENSG00000144407	1.5537	up	4.69716e-19	PTH2R
ENSG00000273030	1.55283	up	0.0144152	RP11-285F16.1
ENSG00000257907	1.55279	up	2.28843e-08	EEF1A1P17
ENSG00000111224	1.55233	up	0.000952396	PARP11
ENSG00000167216	1.55188	up	0.00137191	KATNAL2
ENSG00000224864	1.55157	up	1.02962e-07	CTC-260E6.2
ENSG00000171962	1.55142	up	0.00746394	LRRC48
ENSG00000229251	1.55131	up	2.45588e-06	HNRNPA1P8
ENSG00000229841	1.55114	up	0.00655625	RP11-361K17.2
ENSG00000254509	1.54837	up	0.0158683	RP11-677M14.6
ENSG00000159915	1.54666	up	0.00188056	ZNF233
ENSG00000207205	1.54596	up	0.00777258	RNVU1-15
ENSG00000091513	1.54462	up	1.12381e-16	TF
ENSG00000196268	1.54434	up	4.61728e-27	ZNF493
ENSG00000124160	1.54333	up	1.12701e-14	NCOA5
ENSG00000137269	1.54222	up	0.0046957	LRRC1
ENSG00000188603	1.53959	up	4.46611e-13	CLN3
ENSG00000166086	1.5387	up	0.00515437	JAM3
ENSG00000232335	1.53737	up	0.00512956	RP11-435D7.3
ENSG00000241476	1.53673	up	0.00188702	SSX2
ENSG00000046653	1.53381	up	6.24499e-06	GPM6B
ENSG00000169550	1.53356	up	5.22644e-22	MUC15
ENSG00000233107	1.53225	up	0.00791156	SUCLA2P2
ENSG00000184612	1.53218	up	0.00808509	RPL7P26
ENSG00000267110	1.53105	up	0.000990498	CTD-2587H24.4
ENSG00000196951	1.53059	up	0.0040881	RP11-425I13.3
ENSG00000255510	1.52933	up	0.00966815	OR8A2P
ENSG00000230233	1.52889	up	0.00139527	AF240627.2
ENSG00000120458	1.52852	up	2.51078e-09	MSANTD2
ENSG00000152270	1.52714	up	7.55368e-25	PDE3B
ENSG00000212128	1.52613	up	0.00249404	TAS2R13
ENSG00000073464	1.5259	up	2.8074e-06	CLCN4
ENSG00000129538	1.52529	up	2.51336e-15	RNASE1
ENSG00000229404	1.52504	up	0.00436089	LINC00858
ENSG00000266077	1.52403	up	4.09197e-05	AC139149.1
ENSG00000200279	1.52337	up	0.00743478	SNORD114-10
ENSG00000258741	1.52255	up	1.48506e-06	RP11-386M24.4
ENSG00000163517	1.52165	up	0.00191083	HDAC11
ENSG00000143786	1.5214	up	0.013621	CNIH3
ENSG00000213925	1.52112	up	1.17794e-05	NPM1P33
ENSG00000181894	1.52111	up	1.73423e-06	ZNF329
ENSG00000269973	1.52057	up	0.000731972	RP11-95D17.1
ENSG00000221990	1.52011	up	0.00441221	C5orf55
ENSG00000183251	1.51751	up	2.40007e-13	OR51B4
ENSG00000183150	1.51654	up	0.0101571	GPR19
ENSG00000224078	1.51646	up	6.93743e-05	SNHG14
ENSG00000169604	1.51622	up	4.54819e-11	ANTXR1
ENSG00000123094	1.51424	up	5.5e-43	RASSF8
ENSG00000119547	1.51423	up	0	ONECUT2
ENSG00000235243	1.51306	up	0.00237969	AC093716.1
ENSG00000213333	1.51246	up	0.00189158	NPM1P50
ENSG00000164125	1.5121	up	1.31334e-16	FAM198B
ENSG00000236104	1.51133	up	0.00427272	ZBTB22
ENSG00000196646	1.51101	up	2.633e-09	ZNF136
ENSG00000119922	1.51097	up	0.00486402	IFIT2
ENSG00000115129	1.51096	up	0.00262617	TP53I3
ENSG00000182021	1.50871	up	0.000111819	RP11-381O7.3
ENSG00000164949	1.50862	up	0.00235034	GEM
ENSG00000175611	1.50798	up	0.00604872	LINC00476
ENSG00000258738	1.5074	up	0.0107562	RP11-73E17.2
ENSG00000259784	1.50734	up	0.00683648	ATP6C
ENSG00000176092	1.506	up	0.00896139	AIM1L
ENSG00000095739	1.50499	up	5.90592e-14	BAMBI
ENSG00000198185	1.50484	up	2.08521e-05	ZNF334
ENSG00000197415	1.50425	up	0.00583726	VEPH1
ENSG00000071051	1.50404	up	0.0012811	NCK2
ENSG00000171729	1.50267	up	1.18994e-05	TMEM51
ENSG00000262202	1.50071	up	0	SNORD3D
ENSG00000246695	1.5007	up	7.15417e-05	RASSF8-AS1
ENSG00000223891	1.50052	up	0.00256295	OSER1-AS1
ENSG00000235674	-1.50099	down	3.20575e-11	LDHAP2
ENSG00000130158	-1.50112	down	0	DOCK6
ENSG00000266795	-1.50145	down	0.00525022	RP11-744K17.9
ENSG00000135253	-1.50313	down	0.000856299	KCP
ENSG00000170545	-1.50343	down	1.16099e-06	SMAGP
ENSG00000167191	-1.5036	down	3.75513e-06	GPRC5B
ENSG00000205794	-1.50368	down	0.0153458	RP11-333E13.4
ENSG00000272054	-1.50472	down	2.33897e-06	RP11-423P10.2
ENSG00000248930	-1.50529	down	0.0121237	CTC-250P20.1
ENSG00000179820	-1.50588	down	7.66096e-11	MYADM
ENSG00000218422	-1.50726	down	6.13398e-06	AC016773.1
ENSG00000259075	-1.5088	down	9.99289e-12	POC1B-GALNT4
ENSG00000263069	-1.51203	down	7.24216e-08	CTD-2047H16.4
ENSG00000124370	-1.51219	down	4.23721e-09	MCEE
ENSG00000185100	-1.5124	down	5.77225e-05	ADSSL1
ENSG00000229989	-1.51322	down	9.59762e-07	MIR181A1HG
ENSG00000167578	-1.51493	down	0.000876701	RAB4B
ENSG00000249286	-1.5173	down	0.00546851	CTD-2210P15.2
ENSG00000120306	-1.51808	down	0	CYSTM1
ENSG00000262001	-1.51879	down	6.94178e-12	DLGAP1-AS2
ENSG00000159399	-1.51886	down	0	HK2
ENSG00000107537	-1.51901	down	2.68323e-05	PHYH
ENSG00000111676	-1.51909	down	1.14526e-11	ATN1
ENSG00000115414	-1.51914	down	0	FN1
ENSG00000219529	-1.51993	down	0.00397818	AP000580.1
ENSG00000225855	-1.52224	down	0	RUSC1-AS1
ENSG00000115548	-1.52276	down	0	KDM3A
ENSG00000153815	-1.52316	down	0	CMIP
ENSG00000178146	-1.52339	down	0.0076281	RP1-232L22__B.1
ENSG00000001630	-1.52678	down	0	CYP51A1
ENSG00000119950	-1.52682	down	0	MXI1
ENSG00000200156	-1.52686	down	3.74942e-05	RNU5B-1
ENSG00000217801	-1.52751	down	0.00330067	RP11-465B22.3
ENSG00000116396	-1.5294	down	0.0110492	KCNC4
ENSG00000167978	-1.52959	down	0	SRRM2
ENSG00000103148	-1.52973	down	0	NPRL3
ENSG00000104369	-1.53026	down	0.000471089	JPH1
ENSG00000079385	-1.53029	down	0.00624623	CEACAM1
ENSG00000220205	-1.53067	down	8.31395e-07	VAMP2
ENSG00000233746	-1.53242	down	0.0152028	LINC00656
ENSG00000112977	-1.53339	down	0	DAP
ENSG00000135919	-1.53345	down	0.000108828	SERPINE2
ENSG00000205846	-1.53364	down	0.000897732	CLEC6A
ENSG00000119699	-1.535	down	0.000599952	TGFB3
ENSG00000269821	-1.53504	down	0	KCNQ1OT1
ENSG00000077585	-1.53548	down	0.00639667	GPR137B
ENSG00000101695	-1.5355	down	2.0259e-10	RNF125
ENSG00000159110	-1.53566	down	4.85155e-10	IFNAR2
ENSG00000155158	-1.53655	down	1.42616e-05	TTC39B
ENSG00000099194	-1.53679	down	0	SCD
ENSG00000186439	-1.53854	down	2.38252e-08	TRDN
ENSG00000170542	-1.54238	down	0	SERPINB9
ENSG00000241738	-1.54259	down	0.00595199	ZNF90P1
ENSG00000100599	-1.54282	down	0.00175954	RIN3
ENSG00000250116	-1.54333	down	0.000681834	RP11-417F21.1
ENSG00000068366	-1.54345	down	0	ACSL4
ENSG00000255435	-1.54351	down	0.0154395	RP11-770J1.3
ENSG00000034152	-1.5438	down	0.00574381	MAP2K3
ENSG00000187475	-1.54523	down	0.00445459	HIST1H1T
ENSG00000264462	-1.54532	down	1.12854e-11	MIR3648
ENSG00000257564	-1.54578	down	0.0115466	RP11-123M21.2
ENSG00000265739	-1.54765	down	0.0137898	RP11-354P11.3
ENSG00000226416	-1.5485	down	0.0126951	MRPL23-AS1
ENSG00000203504	-1.54962	down	0.00102933	AC131571.2
ENSG00000162650	-1.55115	down	0.000344769	ATXN7L2
ENSG00000135862	-1.55117	down	1.85051e-10	LAMC1
ENSG00000135373	-1.55262	down	0.000392745	EHF
ENSG00000134461	-1.55312	down	7.33132e-05	ANKRD16
ENSG00000261088	-1.55314	down	7.83973e-05	RP11-61A14.3
ENSG00000164877	-1.55414	down	4.11111e-06	MICALL2
ENSG00000111424	-1.55444	down	0.00106894	VDR
ENSG00000100968	-1.55545	down	0	NFATC4
ENSG00000259581	-1.55587	down	4.82985e-06	TYRO3P
ENSG00000271500	-1.55606	down	0.00166148	RP11-288K12.1
ENSG00000272631	-1.55621	down	0.00320186	RP11-359E3.4
ENSG00000241484	-1.55626	down	0.000492699	ARHGAP8
ENSG00000145020	-1.55633	down	5.78309e-05	AMT
ENSG00000120437	-1.55697	down	0	ACAT2
ENSG00000152527	-1.55819	down	0	PLEKHH2
ENSG00000225439	-1.55888	down	0.00220375	BOLA3-AS1
ENSG00000256586	-1.56069	down	0.000507985	AC091171.1
ENSG00000254088	-1.5641	down	0.000480549	SLC2A3P4
ENSG00000228612	-1.56428	down	2.94598e-06	HK2P1
ENSG00000113356	-1.56493	down	0	POLR3G
ENSG00000147642	-1.56507	down	2.93965e-10	SYBU
ENSG00000233013	-1.5651	down	2.04183e-08	FAM157B
ENSG00000271643	-1.56814	down	0.0142079	RP11-10C24.3
ENSG00000104419	-1.56838	down	0.000190715	NDRG1
ENSG00000117318	-1.5686	down	1.85448e-06	ID3
ENSG00000127507	-1.56895	down	8.43992e-13	EMR2
ENSG00000266805	-1.56986	down	0.0132058	RP11-61L19.1
ENSG00000152818	-1.57028	down	0	UTRN
ENSG00000135643	-1.57056	down	0.0137828	KCNMB4
ENSG00000126368	-1.571	down	0.000393749	NR1D1
ENSG00000139547	-1.57222	down	0.00206841	RDH16
ENSG00000163040	-1.57293	down	0.00175083	CCDC74A
ENSG00000240720	-1.57384	down	0	LRRD1
ENSG00000170379	-1.57546	down	7.94091e-11	FAM115C
ENSG00000044090	-1.57585	down	0	CUL7
ENSG00000248405	-1.57629	down	0.00107812	PRR5-ARHGAP8
ENSG00000186517	-1.5772	down	0.00770149	ARHGAP30
ENSG00000106123	-1.57726	down	0	EPHB6
ENSG00000150687	-1.57731	down	4.75245e-10	PRSS23
ENSG00000165704	-1.57837	down	0	HPRT1
ENSG00000228742	-1.57864	down	4.44089e-16	RP5-884M6.1
ENSG00000168754	-1.5788	down	0	FAM178B
ENSG00000241852	-1.57949	down	0.00221153	C8orf58
ENSG00000024422	-1.57954	down	1.11022e-15	EHD2
ENSG00000272240	-1.5805	down	0.00855523	RP5-855D21.1
ENSG00000166128	-1.58149	down	0	RAB8B
ENSG00000260597	-1.58155	down	0.00467102	AC012531.25
ENSG00000165507	-1.58163	down	3.54944e-06	C10orf10
ENSG00000067191	-1.58303	down	0.00237736	CACNB1
ENSG00000203632	-1.58412	down	8.15888e-08	AC007690.1
ENSG00000187942	-1.5853	down	5.59319e-07	LDLRAD2
ENSG00000104881	-1.58622	down	1.95106e-11	PPP1R13L
ENSG00000245711	-1.587	down	0.000810996	NADK2-AS1
ENSG00000142961	-1.58767	down	3.38994e-08	MOB3C
ENSG00000148400	-1.58855	down	0	NOTCH1
ENSG00000244041	-1.58856	down	5.60152e-12	LINC01011
ENSG00000216813	-1.58864	down	0.0134952	RP11-812I20.2
ENSG00000182247	-1.58889	down	0.00162103	UBE2E2
ENSG00000257594	-1.58936	down	4.44089e-16	GALNT4
ENSG00000091622	-1.59035	down	0.0026991	PITPNM3
ENSG00000130702	-1.59106	down	0	LAMA5
ENSG00000184557	-1.59251	down	0	SOCS3
ENSG00000072952	-1.59341	down	0.00135636	MRVI1
ENSG00000152256	-1.59368	down	0	PDK1
ENSG00000124224	-1.59545	down	6.25332e-07	PPP4R1L
ENSG00000206747	-1.59605	down	0.0134007	RNU6-245P
ENSG00000158008	-1.59606	down	0.00364775	EXTL1
ENSG00000254165	-1.59619	down	0.000973275	RP11-503E24.2
ENSG00000143590	-1.59879	down	0.00540237	EFNA3
ENSG00000256845	-1.59963	down	0.00143483	AC007401.1
ENSG00000168556	-1.60022	down	8.14828e-05	ING2
ENSG00000259974	-1.6009	down	0	LINC00261
ENSG00000115977	-1.60169	down	0	AAK1
ENSG00000122862	-1.60239	down	4.51309e-10	SRGN
ENSG00000130477	-1.60261	down	0.0136982	UNC13A
ENSG00000130584	-1.60291	down	0.00721514	ZBTB46
ENSG00000250746	-1.60386	down	2.55218e-06	RP11-39C10.1
ENSG00000068137	-1.60479	down	5.29878e-09	PLEKHH3
ENSG00000167508	-1.60539	down	0	MVD
ENSG00000224121	-1.60573	down	0.0142294	ATG12P2
ENSG00000147202	-1.60618	down	0.00230082	DIAPH2
ENSG00000269399	-1.60654	down	0.00476856	CTD-3222D19.7
ENSG00000236255	-1.60656	down	1.41062e-09	AC009404.2
ENSG00000170175	-1.6074	down	5.10103e-05	CHRNB1
ENSG00000071205	-1.60751	down	2.28197e-09	ARHGAP10
ENSG00000106624	-1.6082	down	8.88178e-16	AEBP1
ENSG00000197410	-1.60844	down	4.83008e-06	DCHS2
ENSG00000163702	-1.60847	down	0.00157454	IL17RC
ENSG00000237810	-1.6099	down	0.00188919	CTD-2571E19.3
ENSG00000179476	-1.61116	down	0.0042466	C14orf28
ENSG00000138316	-1.61216	down	0	ADAMTS14
ENSG00000172349	-1.61381	down	5.99742e-07	IL16
ENSG00000256439	-1.61407	down	0.00321121	AC008731.1
ENSG00000243323	-1.61431	down	0	PTPRVP
ENSG00000111711	-1.61489	down	0	GOLT1B
ENSG00000198211	-1.61502	down	0.00333916	TUBB3
ENSG00000250959	-1.61627	down	0.00559683	GLUD1P3
ENSG00000138764	-1.61636	down	1.55431e-15	CCNG2
ENSG00000180316	-1.6168	down	0.0100413	PNPLA1
ENSG00000196428	-1.61721	down	0	TSC22D2
ENSG00000108958	-1.61795	down	3.92193e-06	AC016292.3
ENSG00000231119	-1.61915	down	0.000298839	RP4-569M23.2
ENSG00000134333	-1.6193	down	0	LDHA
ENSG00000156206	-1.62061	down	4.16046e-06	C15orf26
ENSG00000257225	-1.62174	down	0.00121731	RP11-328C8.4
ENSG00000272046	-1.62187	down	0.00742687	RP11-471M2.3
ENSG00000163945	-1.62231	down	2.22045e-16	UVSSA
ENSG00000146278	-1.62378	down	0	PNRC1
ENSG00000125895	-1.62539	down	4.71231e-07	TMEM74B
ENSG00000164244	-1.6264	down	0	PRRC1
ENSG00000158186	-1.62657	down	0.00938719	MRAS
ENSG00000130270	-1.62657	down	1.56943e-08	ATP8B3
ENSG00000198915	-1.62715	down	3.59104e-07	RASGEF1A
ENSG00000186352	-1.62808	down	0.000144616	ANKRD37
ENSG00000237683	-1.63183	down	5.65741e-06	AL627309.1
ENSG00000203499	-1.63209	down	0.0103274	FAM83H-AS1
ENSG00000225578	-1.63507	down	0.0087581	NCBP2-AS1
ENSG00000225986	-1.63538	down	0.00546936	RP3-340N1.5
ENSG00000165030	-1.63618	down	4.44089e-16	NFIL3
ENSG00000260528	-1.63844	down	0	FAM157C
ENSG00000187091	-1.63893	down	1.35922e-11	PLCD1
ENSG00000247774	-1.63991	down	1.42381e-10	PCED1B-AS1
ENSG00000157193	-1.64169	down	0	LRP8
ENSG00000250189	-1.64213	down	0.00528933	RP11-362F19.2
ENSG00000228705	-1.64234	down	0.0115011	LINC00659
ENSG00000272198	-1.64282	down	9.0239e-06	RP11-309G3.3
ENSG00000270739	-1.64299	down	0.00628539	RP11-608O8.2
ENSG00000229473	-1.64308	down	0.0131537	RGS17P1
ENSG00000238140	-1.64348	down	0.0144611	RP11-253A20.1
ENSG00000184887	-1.64577	down	0.00796166	BTBD6
ENSG00000235847	-1.64885	down	4.75322e-09	LDHAP7
ENSG00000183696	-1.65102	down	0.00429186	UPP1
ENSG00000167748	-1.65124	down	0.000923365	KLK1
ENSG00000218226	-1.65319	down	2.22045e-16	TATDN2P2
ENSG00000088899	-1.65326	down	9.52282e-06	LZTS3
ENSG00000228703	-1.65365	down	0.00142203	RP5-1160K1.6
ENSG00000110921	-1.6549	down	1.01297e-12	MVK
ENSG00000214110	-1.65579	down	0	LDHAP4
ENSG00000142798	-1.65588	down	0	HSPG2
ENSG00000258021	-1.65721	down	0.000574134	RP11-1100L3.4
ENSG00000130589	-1.65724	down	1.47588e-08	HELZ2
ENSG00000134369	-1.65753	down	0	NAV1
ENSG00000149516	-1.65763	down	0	MS4A3
ENSG00000111674	-1.65878	down	5.33488e-07	ENO2
ENSG00000158856	-1.66128	down	0	DMTN
ENSG00000122574	-1.66189	down	0	WIPF3
ENSG00000198467	-1.66293	down	1.72827e-05	TPM2
ENSG00000104953	-1.6649	down	0.000143665	TLE6
ENSG00000138080	-1.66562	down	0.00170145	EMILIN1
ENSG00000102755	-1.66761	down	5.72635e-11	FLT1
ENSG00000259459	-1.66816	down	0.00399041	RP11-321G12.1
ENSG00000262833	-1.66841	down	0.00440335	RP11-28G8.1
ENSG00000229447	-1.66965	down	0.0119526	RP11-490K7.4
ENSG00000163947	-1.6697	down	1.89761e-10	ARHGEF3
ENSG00000037965	-1.67106	down	0.00175992	HOXC8
ENSG00000099251	-1.67175	down	0.000527791	HSD17B7P2
ENSG00000104267	-1.67336	down	0.00976797	CA2
ENSG00000188459	-1.67397	down	1.62315e-13	WASF4P
ENSG00000132535	-1.67407	down	4.9932e-09	DLG4
ENSG00000026508	-1.67446	down	5.44009e-13	CD44
ENSG00000105329	-1.67469	down	0	TGFB1
ENSG00000224570	-1.6758	down	5.08791e-05	RP11-430H12.2
ENSG00000166527	-1.67628	down	5.58835e-07	CLEC4D
ENSG00000225125	-1.68074	down	0.00959344	RANP4
ENSG00000226771	-1.68089	down	0.0146008	AP001136.2
ENSG00000074855	-1.68151	down	3.2965e-05	ANO8
ENSG00000213530	-1.68274	down	0.00012127	MTHFD2P5
ENSG00000173334	-1.68362	down	0	TRIB1
ENSG00000107821	-1.68388	down	0.00129606	KAZALD1
ENSG00000226549	-1.68419	down	0	SCDP1
ENSG00000253882	-1.68484	down	2.17788e-07	RP11-61L23.2
ENSG00000237686	-1.68501	down	5.3322e-05	RP5-1120P11.1
ENSG00000131069	-1.68532	down	0	ACSS2
ENSG00000225697	-1.6867	down	4.44089e-16	SLC26A6
ENSG00000079459	-1.68721	down	0	FDFT1
ENSG00000267122	-1.68849	down	0.00104543	AC004490.1
ENSG00000153832	-1.68877	down	6.8957e-05	FBXO36
ENSG00000135740	-1.69093	down	8.05128e-06	SLC9A5
ENSG00000101210	-1.69183	down	0.000203677	EEF1A2
ENSG00000102547	-1.69216	down	7.77156e-15	CAB39L
ENSG00000185899	-1.69248	down	1.38879e-10	TAS2R60
ENSG00000226942	-1.6938	down	0.000104674	IL9RP3
ENSG00000258968	-1.69511	down	0.0142943	RP11-829H16.5
ENSG00000197670	-1.69573	down	0.00043644	RP4-724E16.2
ENSG00000104888	-1.69596	down	0.00273028	SLC17A7
ENSG00000164683	-1.69635	down	3.47029e-07	HEY1
ENSG00000159840	-1.69838	down	0	ZYX
ENSG00000151006	-1.69926	down	0.000420327	PRSS53
ENSG00000100934	-1.70038	down	0	SEC23A
ENSG00000088053	-1.70382	down	8.23682e-08	GP6
ENSG00000113532	-1.70484	down	0.00251156	ST8SIA4
ENSG00000215035	-1.70488	down	5.42472e-05	FDPSP5
ENSG00000073060	-1.70612	down	0	SCARB1
ENSG00000164512	-1.70697	down	0.000104662	ANKRD55
ENSG00000159753	-1.70716	down	4.91367e-06	RLTPR
ENSG00000124813	-1.70809	down	0	RUNX2
ENSG00000231905	-1.70857	down	0.0101312	SETP10
ENSG00000232186	-1.70991	down	0.00974529	RP11-311P8.2
ENSG00000167771	-1.71205	down	0.000432378	RCOR2
ENSG00000163703	-1.71395	down	0	CRELD1
ENSG00000233588	-1.71723	down	0	CYP51P2
ENSG00000260229	-1.71826	down	0.00921637	RP11-391L3.5
ENSG00000234066	-1.72014	down	1.94651e-08	TAS2R62P
ENSG00000082175	-1.72137	down	2.6797e-05	PGR
ENSG00000187536	-1.72198	down	0.0109703	TPM3P7
ENSG00000250295	-1.7222	down	0.00113819	RP11-434I12.2
ENSG00000168067	-1.72257	down	2.40489e-09	MAP4K2
ENSG00000242247	-1.72335	down	0	ARFGAP3
ENSG00000169710	-1.72528	down	0	FASN
ENSG00000185033	-1.72704	down	4.20141e-10	SEMA4B
ENSG00000226148	-1.72909	down	0.000173224	SLC25A39P1
ENSG00000214595	-1.7299	down	1.18173e-05	EML6
ENSG00000100647	-1.73181	down	0	KIAA0247
ENSG00000214773	-1.73225	down	0.0101228	RP11-717D12.1
ENSG00000143466	-1.73289	down	1.8424e-07	IKBKE
ENSG00000105366	-1.73487	down	0.0146829	SIGLEC8
ENSG00000167895	-1.73908	down	0.0051735	TMC8
ENSG00000250365	-1.73975	down	0.00644225	CTD-2213F21.2
ENSG00000105613	-1.74068	down	0.00144807	MAST1
ENSG00000109654	-1.74115	down	3.15525e-13	TRIM2
ENSG00000232783	-1.74134	down	0.0121159	AC073135.3
ENSG00000221698	-1.74203	down	0.0145275	MIR548H3
ENSG00000129667	-1.74604	down	0.00137172	RHBDF2
ENSG00000257000	-1.74726	down	0.00580034	RP13-820C6.2
ENSG00000134030	-1.74809	down	1.82832e-12	CTIF
ENSG00000179715	-1.74904	down	0	PCED1B
ENSG00000213574	-1.74977	down	4.44089e-16	LDHAP5
ENSG00000123999	-1.75299	down	0.000345464	INHA
ENSG00000120896	-1.75463	down	0.0001498	SORBS3
ENSG00000228816	-1.75477	down	0.00362179	AK3P5
ENSG00000237016	-1.75707	down	0.0143986	AC013410.1
ENSG00000154118	-1.75768	down	0.0120289	JPH3
ENSG00000142765	-1.7604	down	0.00931754	SYTL1
ENSG00000196141	-1.762	down	0	SPATS2L
ENSG00000205592	-1.76328	down	0	MUC19
ENSG00000169169	-1.7638	down	0.00220956	CPT1C
ENSG00000196476	-1.76385	down	1.74216e-12	C20orf96
ENSG00000261337	-1.76398	down	0.001123	RP11-498D10.5
ENSG00000266445	-1.76409	down	0.0159525	RP13-991F5.2
ENSG00000233264	-1.76427	down	0.000545954	AC006042.8
ENSG00000273162	-1.76453	down	0.0107432	RP11-108L7.15
ENSG00000103522	-1.77097	down	0.000996999	IL21R
ENSG00000271156	-1.77116	down	0.0161786	RP11-642C5.1
ENSG00000131389	-1.7717	down	0	SLC6A6
ENSG00000043355	-1.7723	down	1.57455e-05	ZIC2
ENSG00000172889	-1.7749	down	0	EGFL7
ENSG00000002834	-1.77847	down	0	LASP1
ENSG00000232220	-1.78009	down	0.0108194	AC008440.5
ENSG00000240974	-1.78098	down	0.00917463	CTD-2024I7.1
ENSG00000132196	-1.783	down	0	HSD17B7
ENSG00000020577	-1.78339	down	8.753e-13	SAMD4A
ENSG00000223608	-1.784	down	0.00255562	DSCR4-IT1
ENSG00000116833	-1.78433	down	1.72981e-05	NR5A2
ENSG00000186056	-1.785	down	2.78022e-12	MATN1-AS1
ENSG00000164078	-1.78554	down	0.000933852	MST1R
ENSG00000163631	-1.78609	down	0.00967205	ALB
ENSG00000067064	-1.78664	down	0	IDI1
ENSG00000137747	-1.79	down	0.000611143	TMPRSS13
ENSG00000146352	-1.79182	down	1.99194e-05	CLVS2
ENSG00000163463	-1.79421	down	3.33067e-14	KRTCAP2
ENSG00000236016	-1.79605	down	2.35222e-05	RP1-3J17.3
ENSG00000265784	-1.79684	down	1.15348e-07	RP1-56K13.3
ENSG00000158109	-1.79834	down	6.115e-11	TPRG1L
ENSG00000257924	-1.79958	down	0	RP11-493L12.5
ENSG00000179094	-1.80026	down	6.29452e-12	PER1
ENSG00000095539	-1.80169	down	1.12897e-05	SEMA4G
ENSG00000143842	-1.80177	down	6.29891e-08	SOX13
ENSG00000167106	-1.80196	down	3.17852e-11	FAM102A
ENSG00000259294	-1.8028	down	0.00484331	CTA-339C12.1
ENSG00000137103	-1.81042	down	0.000168127	TMEM8B
ENSG00000141744	-1.81267	down	3.26169e-06	PNMT
ENSG00000256799	-1.81343	down	8.6849e-05	RP11-500M8.6
ENSG00000149925	-1.81399	down	0	ALDOA
ENSG00000120949	-1.81451	down	4.44089e-16	TNFRSF8
ENSG00000196154	-1.81577	down	0.00122287	S100A4
ENSG00000141526	-1.81718	down	0.000457599	SLC16A3
ENSG00000008300	-1.81838	down	1.82897e-05	CELSR3
ENSG00000218521	-1.81882	down	0.0103608	RP11-420A21.1
ENSG00000106003	-1.8192	down	0.0142847	LFNG
ENSG00000175536	-1.82334	down	0.00601086	LIPT2
ENSG00000231049	-1.8265	down	0.0145275	OR52B5P
ENSG00000233461	-1.82662	down	3.70463e-08	RP11-295G20.2
ENSG00000169992	-1.82736	down	1.97216e-06	NLGN2
ENSG00000184596	-1.82821	down	0.00299361	AF207550.1
ENSG00000081051	-1.83046	down	0	AFP
ENSG00000131979	-1.83597	down	4.44089e-16	GCH1
ENSG00000205089	-1.83776	down	0.000446058	CCNI2
ENSG00000109089	-1.83889	down	0.000396782	CDR2L
ENSG00000225693	-1.83918	down	0.00211621	RP11-54K16.2
ENSG00000224745	-1.83955	down	0.00852762	RP11-380G5.2
ENSG00000245385	-1.84257	down	0.00684048	RP11-334E6.10
ENSG00000266373	-1.84448	down	0.00875023	RP11-710M11.1
ENSG00000266709	-1.8464	down	2.22045e-15	RP11-214O1.2
ENSG00000122884	-1.85668	down	0	P4HA1
ENSG00000263013	-1.85835	down	4.99206e-06	RP11-876N24.5
ENSG00000160111	-1.86178	down	1.51453e-05	CPAMD8
ENSG00000267364	-1.86292	down	0.0101474	RP11-47L3.1
ENSG00000171224	-1.86379	down	1.57243e-05	C10orf35
ENSG00000229191	-1.86425	down	1.29203e-06	RP11-168O16.1
ENSG00000241095	-1.86497	down	0	CYP51P1
ENSG00000261270	-1.86527	down	0.000758775	RP11-325K4.3
ENSG00000272798	-1.86901	down	0.00804859	CTA-390C10.9
ENSG00000068796	-1.86921	down	0	KIF2A
ENSG00000116852	-1.87004	down	0	KIF21B
ENSG00000188493	-1.87642	down	0	C19orf54
ENSG00000203691	-1.87709	down	0.000158922	AC092811.1
ENSG00000198598	-1.87834	down	0.00246567	MMP17
ENSG00000044574	-1.88008	down	0	HSPA5
ENSG00000120738	-1.88406	down	0	EGR1
ENSG00000270108	-1.88561	down	0.00781509	RP11-73M18.6
ENSG00000168758	-1.88607	down	0	SEMA4C
ENSG00000250135	-1.88814	down	0.000106815	RP4-622L5.2
ENSG00000263786	-1.88862	down	0.00141516	RP11-649A18.4
ENSG00000196083	-1.89124	down	1.72506e-06	IL1RAP
ENSG00000135636	-1.89156	down	0	DYSF
ENSG00000266053	-1.89412	down	0.000266421	RP11-143J12.2
ENSG00000100031	-1.89439	down	2.28775e-08	GGT1
ENSG00000225996	-1.89457	down	1.53759e-09	AL356356.1
ENSG00000158158	-1.8949	down	0	CNNM4
ENSG00000270269	-1.89751	down	0.0039675	RP11-697H9.4
ENSG00000249249	-1.89849	down	0.00331994	AC010226.4
ENSG00000160223	-1.89987	down	0	ICOSLG
ENSG00000141505	-1.90195	down	0.00945895	ASGR1
ENSG00000219790	-1.90275	down	0.00526604	OSTCP6
ENSG00000084731	-1.90419	down	3.04423e-13	KIF3C
ENSG00000171533	-1.90564	down	0.00871213	MAP6
ENSG00000074410	-1.90724	down	5.11206e-05	CA12
ENSG00000270809	-1.9081	down	0.0101474	CHCHD2P11
ENSG00000197712	-1.9083	down	4.95159e-14	FAM114A1
ENSG00000213250	-1.9091	down	2.22299e-06	RBMS2P1
ENSG00000113161	-1.91051	down	0	HMGCR
ENSG00000162746	-1.91064	down	0.00834845	FCRLB
ENSG00000007516	-1.91176	down	2.97399e-09	BAIAP3
ENSG00000170412	-1.91286	down	0	GPRC5C
ENSG00000261659	-1.91328	down	0.00122029	LA16c-313D11.12
ENSG00000270427	-1.91523	down	0.00158183	NRBF2P5
ENSG00000254433	-1.91575	down	3.24941e-07	RP11-677I18.3
ENSG00000248777	-1.91884	down	0.00855722	AC006499.6
ENSG00000060656	-1.92071	down	9.5842e-05	PTPRU
ENSG00000177112	-1.92108	down	0.00194064	MRVI1-AS1
ENSG00000165188	-1.92163	down	0.00188168	RNF183
ENSG00000232762	-1.92191	down	0.0112623	RP4-784A16.4
ENSG00000164211	-1.92322	down	0	STARD4
ENSG00000242931	-1.92546	down	0.00647633	RP11-666A8.1
ENSG00000273451	-1.92818	down	0.000200524	RP4-569M23.4
ENSG00000184232	-1.93071	down	8.88178e-16	OAF
ENSG00000230424	-1.93132	down	0.00647679	RP1-43E13.2
ENSG00000170190	-1.93264	down	0.000149503	SLC16A5
ENSG00000225527	-1.93518	down	0.00962676	RP11-383B4.4
ENSG00000250107	-1.9368	down	0.013281	CACNA1G-AS1
ENSG00000232646	-1.93957	down	0.0145605	RP11-344N10.4
ENSG00000137218	-1.94057	down	0.000908824	FRS3
ENSG00000065717	-1.94209	down	0	TLE2
ENSG00000079435	-1.94239	down	0.00196665	LIPE
ENSG00000119715	-1.9459	down	0	ESRRB
ENSG00000174460	-1.94785	down	0.0149237	ZCCHC12
ENSG00000115507	-1.95094	down	4.1607e-05	OTX1
ENSG00000156381	-1.95208	down	8.32461e-06	ANKRD9
ENSG00000196138	-1.95218	down	0.00188867	AC005831.1
ENSG00000134317	-1.9567	down	7.91259e-06	GRHL1
ENSG00000130822	-1.95864	down	0.00995717	PNCK
ENSG00000176165	-1.96072	down	0.00161757	FOXG1
ENSG00000153233	-1.96151	down	0	PTPRR
ENSG00000154429	-1.96507	down	0	CCSAP
ENSG00000228079	-1.96613	down	0.0138903	AC012368.1
ENSG00000050030	-1.96613	down	0.00775314	KIAA2022
ENSG00000104870	-1.96618	down	0.000116862	FCGRT
ENSG00000114626	-1.96846	down	0.000785728	ABTB1
ENSG00000172893	-1.97243	down	0	DHCR7
ENSG00000074181	-1.97284	down	0.00328081	NOTCH3
ENSG00000246859	-1.97296	down	0.00505199	STARD4-AS1
ENSG00000233602	-1.97458	down	0.006618	ERI3-IT1
ENSG00000150961	-1.97556	down	0	SEC24D
ENSG00000125730	-1.97654	down	4.86278e-14	C3
ENSG00000138835	-1.98295	down	2.21827e-05	RGS3
ENSG00000225632	-1.98443	down	0.00591428	RP5-997D24.3
ENSG00000246982	-1.98938	down	1.62615e-07	RP1-179N16.6
ENSG00000237135	-1.98958	down	0.0127651	DDX10P1
ENSG00000160867	-1.99026	down	0	FGFR4
ENSG00000249992	-1.991	down	0	TMEM158
ENSG00000253555	-1.99567	down	0.00855722	RP11-16E18.1
ENSG00000127666	-1.99978	down	1.23618e-06	TICAM1
ENSG00000269481	-2.00135	down	0.00295488	CTD-2521M24.6
ENSG00000143502	-2.0019	down	5.47318e-12	SUSD4
ENSG00000197587	-2.00505	down	2.29949e-12	DMBX1
ENSG00000221890	-2.00718	down	8.3733e-13	NPTXR
ENSG00000259258	-2.00823	down	0.0103876	RP11-325L12.3
ENSG00000236528	-2.00996	down	0.00212458	RP1-125I3.2
ENSG00000104946	-2.01069	down	6.66762e-09	TBC1D17
ENSG00000219298	-2.01288	down	0.00952979	RP11-472G23.3
ENSG00000144369	-2.01319	down	2.00805e-05	FAM171B
ENSG00000039523	-2.01415	down	7.55975e-11	FAM65A
ENSG00000241666	-2.01555	down	7.0155e-12	RP3-455J7.4
ENSG00000229695	-2.01727	down	0.00490766	AC011242.5
ENSG00000228624	-2.01731	down	0.00905371	RP3-399L15.3
ENSG00000224885	-2.02549	down	0.0159705	TSSC1-IT1
ENSG00000260558	-2.02565	down	0.00256668	RP11-63M22.1
ENSG00000251338	-2.02761	down	0.00653817	AC006499.1
ENSG00000208036	-2.02766	down	0.0127035	MIR106B
ENSG00000267060	-2.02963	down	0.000470261	PTGES3L
ENSG00000243900	-2.03338	down	0.0111998	RN7SL320P
ENSG00000126878	-2.03468	down	0	AIF1L
ENSG00000167549	-2.03484	down	2.40604e-06	CORO6
ENSG00000250980	-2.03781	down	0.0032342	RP11-529H22.1
ENSG00000231233	-2.04053	down	0.0118115	CCDC147-AS1
ENSG00000157613	-2.04843	down	5.84422e-08	CREB3L1
ENSG00000163932	-2.05187	down	2.48281e-06	PRKCD
ENSG00000167123	-2.05336	down	2.22045e-16	CERCAM
ENSG00000268257	-2.06374	down	0.00739681	AIRN
ENSG00000130829	-2.06419	down	0.000547604	DUSP9
ENSG00000231636	-2.06587	down	0.00576652	AGBL5-AS1
ENSG00000180658	-2.06701	down	0.00855722	OR2A4
ENSG00000251186	-2.06817	down	0.00571244	RP11-689P11.3
ENSG00000232736	-2.06863	down	0.00689972	AC007551.2
ENSG00000164976	-2.0715	down	0.000585827	KIAA1161
ENSG00000253368	-2.0736	down	0.00535103	TRNP1
ENSG00000100100	-2.07529	down	3.00083e-08	PIK3IP1
ENSG00000267291	-2.07718	down	0.0120331	CTB-186G2.1
ENSG00000174938	-2.0837	down	0.00135385	SEZ6L2
ENSG00000272947	-2.08472	down	0.00776292	RP11-71H17.9
ENSG00000143595	-2.08604	down	2.22045e-16	AQP10
ENSG00000198270	-2.08762	down	0	TMEM116
ENSG00000227115	-2.0902	down	0.00243161	RP11-267C16.1
ENSG00000177752	-2.09082	down	0.0151435	YIPF7
ENSG00000117519	-2.09192	down	6.59797e-05	CNN3
ENSG00000225813	-2.09231	down	0.000127977	AC009299.4
ENSG00000236709	-2.09285	down	0.00779801	DAPK1-IT1
ENSG00000267681	-2.09531	down	0.00359967	CTD-3199J23.6
ENSG00000115896	-2.10087	down	0	PLCL1
ENSG00000263847	-2.1025	down	4.30618e-10	RP11-143J12.3
ENSG00000079557	-2.10789	down	0.00696189	AFM
ENSG00000171496	-2.11124	down	0.00721624	OR1L8
ENSG00000222649	-2.11203	down	0.00691781	Y_RNA
ENSG00000267062	-2.11382	down	6.16776e-06	CTD-2659N19.10
ENSG00000251676	-2.11535	down	0.0111836	RP11-614F17.2
ENSG00000099330	-2.1177	down	2.80345e-07	OCEL1
ENSG00000273045	-2.12054	down	0.00141608	C2ORF15
ENSG00000105088	-2.12462	down	0.0148731	OLFM2
ENSG00000114268	-2.126	down	0	PFKFB4
ENSG00000184786	-2.12654	down	0.0108943	TCTE3
ENSG00000104833	-2.13035	down	0.00970724	TUBB4A
ENSG00000224794	-2.13357	down	0.0036264	RP3-333H23.8
ENSG00000116741	-2.13514	down	2.91226e-07	RGS2
ENSG00000165698	-2.15089	down	7.36999e-06	C9orf9
ENSG00000155269	-2.15996	down	0.00193174	GPR78
ENSG00000107719	-2.16237	down	0	PALD1
ENSG00000180340	-2.16538	down	0.001278	FZD2
ENSG00000163638	-2.16623	down	0.000229137	ADAMTS9
ENSG00000107331	-2.17149	down	0	ABCA2
ENSG00000258716	-2.17149	down	0.00742945	RP11-661G16.2
ENSG00000250037	-2.1779	down	0.00927674	RP11-480D4.4
ENSG00000186480	-2.17836	down	0	INSIG1
ENSG00000255328	-2.18595	down	0.010461	RP11-326C3.12
ENSG00000257156	-2.18682	down	0.00752536	RP11-13A1.3
ENSG00000258378	-2.18813	down	0.0110774	RP11-517O13.1
ENSG00000101335	-2.19004	down	0.0090602	MYL9
ENSG00000115257	-2.19124	down	2.29089e-05	PCSK4
ENSG00000164303	-2.19195	down	0.000649183	ENPP6
ENSG00000113205	-2.19652	down	0.0112473	PCDHB3
ENSG00000273284	-2.19937	down	4.6651e-08	RP11-888D10.4
ENSG00000124334	-2.20181	down	0	IL9R
ENSG00000172638	-2.20202	down	5.71126e-06	EFEMP2
ENSG00000248100	-2.20548	down	8.28286e-05	RP11-709A23.1
ENSG00000260646	-2.20733	down	0.0140343	LA16c-385E7.1
ENSG00000126458	-2.21144	down	2.91417e-05	RRAS
ENSG00000231508	-2.21222	down	0.00647978	RP11-452K12.6
ENSG00000014914	-2.21377	down	0.0130917	MTMR11
ENSG00000256250	-2.2172	down	0.00664732	RP11-989F5.1
ENSG00000185499	-2.2185	down	8.41692e-06	MUC1
ENSG00000239868	-2.22043	down	0.00787952	RN7SL34P
ENSG00000262881	-2.22255	down	0.0108854	RP11-669E14.4
ENSG00000176244	-2.22377	down	0.00150445	ACBD7
ENSG00000141540	-2.22853	down	0.00169473	TTYH2
ENSG00000178568	-2.2295	down	0.00922359	ERBB4
ENSG00000149534	-2.23391	down	0.00128942	MS4A2
ENSG00000143217	-2.23619	down	0.00665653	PVRL4
ENSG00000248323	-2.24311	down	0.000757257	LUCAT1
ENSG00000143845	-2.24363	down	0.00096595	ETNK2
ENSG00000249803	-2.24598	down	5.95302e-13	RP11-114H21.2
ENSG00000226469	-2.25215	down	3.55416e-07	ADAM1B
ENSG00000259071	-2.25361	down	0.00413966	RP11-247L20.4
ENSG00000149599	-2.25668	down	0.00412645	DUSP15
ENSG00000102886	-2.25864	down	0.0117323	GDPD3
ENSG00000235878	-2.261	down	2.48875e-08	AP001468.1
ENSG00000099139	-2.26134	down	0.00226143	PCSK5
ENSG00000138675	-2.2621	down	0.00151371	FGF5
ENSG00000196622	-2.26718	down	9.01535e-05	RIMBP3
ENSG00000245156	-2.26922	down	0.00397008	RP11-867G23.3
ENSG00000018280	-2.26976	down	6.78893e-11	SLC11A1
ENSG00000198754	-2.27935	down	0.00521485	OXCT2
ENSG00000239912	-2.28087	down	0.00845906	RPL39P36
ENSG00000225808	-2.28453	down	0.000178765	DNAJC19P5
ENSG00000257624	-2.28583	down	0.00118563	RP1-128M12.3
ENSG00000266401	-2.28747	down	5.1894e-05	RP11-874J12.4
ENSG00000197146	-2.28782	down	0.00292293	AL133458.1
ENSG00000130164	-2.28788	down	0	LDLR
ENSG00000236426	-2.28823	down	0.00831331	RP11-79M19.2
ENSG00000232549	-2.29105	down	0.00138148	SRD5A1P1
ENSG00000239377	-2.29121	down	0.00581848	RP4-584D14.6
ENSG00000196934	-2.29184	down	0.00172345	RIMBP3B
ENSG00000229263	-2.29237	down	0.00553389	AC004691.5
ENSG00000163739	-2.29361	down	0.00122148	CXCL1
ENSG00000260671	-2.29793	down	0.00266618	RP11-278A23.2
ENSG00000181214	-2.29845	down	0.00397456	OR8G2P
ENSG00000183246	-2.30051	down	0.00117923	RIMBP3C
ENSG00000238463	-2.30147	down	0.0118811	snoU13
ENSG00000107819	-2.30504	down	1.90824e-05	SFXN3
ENSG00000130711	-2.31234	down	0.0130061	PRDM12
ENSG00000160767	-2.31506	down	0	FAM189B
ENSG00000225806	-2.31814	down	0.0129994	RP1-309F20.3
ENSG00000270409	-2.31925	down	8.30185e-07	RP11-44D5.1
ENSG00000243265	-2.32184	down	0.0133374	RP11-1149O23.1
ENSG00000171786	-2.32575	down	3.24918e-12	NHLH1
ENSG00000270300	-2.32621	down	0.00391212	RP11-359E7.2
ENSG00000126264	-2.34471	down	0.00283883	HCST
ENSG00000154930	-2.35905	down	8.16488e-05	ACSS1
ENSG00000165215	-2.36803	down	0.00432758	CLDN3
ENSG00000131773	-2.36812	down	0.000443258	KHDRBS3
ENSG00000254615	-2.37513	down	0.00575303	RP11-395G23.3
ENSG00000226777	-2.37609	down	4.5204e-06	KIAA0125
ENSG00000155367	-2.37632	down	2.8952e-06	PPM1J
ENSG00000166145	-2.37779	down	1.50928e-07	SPINT1
ENSG00000167676	-2.38037	down	0.00530345	PLIN4
ENSG00000004660	-2.38788	down	5.13675e-08	CAMKK1
ENSG00000224616	-2.39105	down	0.00530346	RP11-305E17.6
ENSG00000152495	-2.39212	down	6.49415e-05	CAMK4
ENSG00000231084	-2.40099	down	0.00251521	CTA-253N17.1
ENSG00000061656	-2.40103	down	7.47257e-07	SPAG4
ENSG00000272990	-2.40891	down	0.00261024	RP11-305K5.1
ENSG00000125864	-2.41337	down	0.0134924	BFSP1
ENSG00000099822	-2.41553	down	0.00535869	HCN2
ENSG00000246363	-2.41973	down	5.00089e-12	RP11-13A1.1
ENSG00000142871	-2.4208	down	0.00558597	CYR61
ENSG00000178795	-2.42717	down	6.76424e-10	GDPD4
ENSG00000187210	-2.42766	down	0.0107591	GCNT1
ENSG00000052802	-2.43691	down	0	MSMO1
ENSG00000005700	-2.43841	down	0	IBTK
ENSG00000267730	-2.44001	down	0.00636467	CTD-2537I9.5
ENSG00000059915	-2.44155	down	5.37264e-06	PSD
ENSG00000229948	-2.44453	down	0.00428286	AC092431.2
ENSG00000108821	-2.44567	down	0.000190387	COL1A1
ENSG00000185453	-2.44909	down	0.0144339	C19orf68
ENSG00000258352	-2.45984	down	0.000110646	RP11-23J18.1
ENSG00000266733	-2.46523	down	0.00181278	TBC1D29
ENSG00000113070	-2.46554	down	8.09003e-05	HBEGF
ENSG00000236008	-2.46927	down	4.22323e-07	AC011747.4
ENSG00000162148	-2.47271	down	0.000245098	PPP1R32
ENSG00000273245	-2.47379	down	0.00106286	RP11-434P11.2
ENSG00000235908	-2.47488	down	0.0119863	RHOA-IT1
ENSG00000206538	-2.47528	down	0.00838739	VGLL3
ENSG00000255655	-2.47697	down	0.00361329	RP11-256L11.3
ENSG00000272478	-2.47719	down	0.0129473	RP1-317E23.7
ENSG00000248522	-2.47852	down	0.0162045	SBF1P1
ENSG00000273026	-2.48352	down	0.0155225	RP11-422P24.10
ENSG00000237130	-2.48701	down	0.00116751	MRPS6P2
ENSG00000228481	-2.49069	down	0.00651443	U51244.2
ENSG00000261705	-2.49517	down	0.000328988	RP11-61A14.2
ENSG00000234937	-2.49609	down	0.000475781	RP11-101O6.2
ENSG00000267298	-2.49966	down	0.0146746	AC006116.19
ENSG00000239808	-2.49988	down	0.00103485	RN7SL255P
ENSG00000265666	-2.5016	down	0.00621311	CTD-2267D19.2
ENSG00000214184	-2.50292	down	0.00658739	AC012487.2
ENSG00000252707	-2.50361	down	0.00763251	RNU11-2P
ENSG00000139926	-2.50773	down	0.00287009	FRMD6
ENSG00000265019	-2.51004	down	0.0122683	NCOR1P2
ENSG00000267671	-2.5143	down	0.000328063	RP11-115K3.2
ENSG00000107551	-2.51895	down	0.00235327	RASSF4
ENSG00000257818	-2.51944	down	0.0112182	RP11-1143G9.2
ENSG00000178821	-2.52446	down	0.00167128	TMEM52
ENSG00000183484	-2.52676	down	0.00218856	GPR132
ENSG00000199700	-2.52925	down	0.0119538	RNU6-223P
ENSG00000203721	-2.53031	down	0.00726963	LINC00862
ENSG00000214128	-2.53246	down	0.0160179	TMEM213
ENSG00000234409	-2.53428	down	0.0114914	AC006547.14
ENSG00000154269	-2.54316	down	0.000210747	ENPP3
ENSG00000164530	-2.54328	down	0.00320503	PI16
ENSG00000213781	-2.54477	down	0.00514876	PSMC1P2
ENSG00000201863	-2.56081	down	0.00193026	SNORA51
ENSG00000253704	-2.56522	down	0.00748929	RP11-267M23.4
ENSG00000225511	-2.5856	down	0.00220828	LINC00475
ENSG00000174945	-2.58719	down	0.000392658	AMZ1
ENSG00000249054	-2.58744	down	0.00239304	RP11-598F7.1
ENSG00000138119	-2.5966	down	6.29046e-06	MYOF
ENSG00000268460	-2.59683	down	0.00726934	AC006262.6
ENSG00000130821	-2.59713	down	0	SLC6A8
ENSG00000196972	-2.60426	down	0.0130061	LINC00087
ENSG00000253399	-2.61119	down	0.00630083	AC078852.2
ENSG00000259467	-2.61252	down	0.012243	NDUFAF4P1
ENSG00000104901	-2.61683	down	0.00539049	DKKL1
ENSG00000235424	-2.61728	down	0.00307283	AC112211.3
ENSG00000164114	-2.61761	down	0.00173827	MAP9
ENSG00000270697	-2.62056	down	0.0118661	RP11-381K20.4
ENSG00000229525	-2.62418	down	0.00152834	AC053503.4
ENSG00000213033	-2.62711	down	3.55271e-15	AURKAPS1
ENSG00000200842	-2.631	down	0.00274359	Y_RNA
ENSG00000269526	-2.63427	down	0.00273877	ERVV-1
ENSG00000253764	-2.63703	down	0.0106966	RP11-439C15.4
ENSG00000253910	-2.63809	down	0.0043805	PCDHGB2
ENSG00000213265	-2.64511	down	0.0149649	TSGA13
ENSG00000272588	-2.64866	down	0.00576918	RP11-440L14.4
ENSG00000258872	-2.66438	down	0.0140445	FDPSP3
ENSG00000230736	-2.66793	down	0.00832295	RP1-149A16.3
ENSG00000231981	-2.6841	down	0.0121518	RPL7L1P12
ENSG00000265684	-2.68679	down	0.00416754	RN7SL378P
ENSG00000128602	-2.68944	down	0.0112503	SMO
ENSG00000158560	-2.69272	down	0.00185748	DYNC1I1
ENSG00000200114	-2.70391	down	0.00667349	RNA5SP123
ENSG00000151322	-2.71071	down	0.00712455	NPAS3
ENSG00000213830	-2.72199	down	0.000352242	CFL1P5
ENSG00000185615	-2.73543	down	0.00618266	PDIA2
ENSG00000228784	-2.73998	down	0.000221856	LINC00954
ENSG00000270257	-2.74406	down	1.22604e-05	RP11-17P16.2
ENSG00000215565	-2.75701	down	0.00998653	AP003041.1
ENSG00000205537	-2.75848	down	0.0018905	RP11-89H19.1
ENSG00000231881	-2.7606	down	0.00185897	RP5-1120P11.3
ENSG00000201458	-2.77552	down	0.00309506	RNU4-4P
ENSG00000231955	-2.77693	down	0.0143615	AC007383.4
ENSG00000273309	-2.78079	down	0.0114919	AC004410.3
ENSG00000258402	-2.78382	down	0.00713334	RP11-516J2.1
ENSG00000237624	-2.78986	down	0.00631355	OXCT2P1
ENSG00000168675	-2.79421	down	0.00370638	LDLRAD4
ENSG00000131015	-2.79905	down	2.20122e-09	ULBP2
ENSG00000178401	-2.80198	down	0.00357641	DNAJC22
ENSG00000142552	-2.80392	down	1.14985e-05	RCN3
ENSG00000225338	-2.80692	down	0.00242567	RP11-384C4.3
ENSG00000259196	-2.80734	down	0.0108744	HMBOX1-IT1
ENSG00000272672	-2.80984	down	0.00712804	RP11-302M6.5
ENSG00000172425	-2.81376	down	0.0111106	TTC36
ENSG00000206755	-2.81532	down	0.0157995	SNORA30
ENSG00000144645	-2.8186	down	9.57773e-05	OSBPL10
ENSG00000238278	-2.81924	down	0.00116169	ALG1L6P
ENSG00000235314	-2.82455	down	0.000172667	LINC00957
ENSG00000236254	-2.8256	down	0.0138204	MTND4P14
ENSG00000272632	-2.82666	down	0.00580692	RP11-362F19.3
ENSG00000261758	-2.83683	down	0.00273164	RP11-102M11.2
ENSG00000172382	-2.84465	down	0.0111921	PRSS27
ENSG00000213471	-2.84728	down	0.00950797	TTLL13
ENSG00000227523	-2.8545	down	0.000144366	RPS20P15
ENSG00000267557	-2.85489	down	0.00167612	CTC-379B2.4
ENSG00000137474	-2.85719	down	9.96887e-11	MYO7A
ENSG00000197380	-2.86303	down	0.00662645	DACT3
ENSG00000161921	-2.86433	down	0.000244134	CXCL16
ENSG00000169429	-2.86629	down	0	IL8
ENSG00000253908	-2.87371	down	0.00560275	RP11-252I14.2
ENSG00000271314	-2.88297	down	0.0131399	RP11-435O5.6
ENSG00000127585	-2.88638	down	5.02574e-05	FBXL16
ENSG00000178750	-2.90335	down	7.21931e-05	STX19
ENSG00000188060	-2.90428	down	0.010242	RAB42
ENSG00000254231	-2.90519	down	0.015003	CTD-2284J15.1
ENSG00000270072	-2.91053	down	0.00902646	RP11-750H9.7
ENSG00000233775	-2.91296	down	0.00754256	RP4-811H24.9
ENSG00000228615	-2.91439	down	0.00825149	AC093166.3
ENSG00000099282	-2.91887	down	8.46968e-05	TSPAN15
ENSG00000254757	-2.91933	down	0.00507735	RP13-726E6.1
ENSG00000232273	-2.91996	down	0.000716504	FTH1P1
ENSG00000265205	-2.92457	down	7.15485e-07	AC010761.13
ENSG00000182168	-2.92603	down	0.00197002	UNC5C
ENSG00000259015	-2.92929	down	0.0113399	RP11-109N23.6
ENSG00000212259	-2.92998	down	0.00537341	RNU6-308P
ENSG00000272283	-2.93681	down	0.00825323	Metazoa_SRP
ENSG00000254340	-2.94614	down	0.00211219	RP11-10A14.3
ENSG00000222385	-2.94743	down	0.00395262	RN7SKP158
ENSG00000223044	-2.9481	down	0.0120936	RNU6-130P
ENSG00000224598	-2.96477	down	0.00580482	RPS5P2
ENSG00000112972	-2.96822	down	0	HMGCS1
ENSG00000153012	-2.98114	down	0.000283072	LGI2
ENSG00000242818	-2.99804	down	0.00101184	RN7SL846P
ENSG00000186326	-3.00251	down	0.00052035	RGS9BP
ENSG00000137449	-3.00435	down	0.000129935	CPEB2
ENSG00000224802	-3.00745	down	0.00373763	TUBB4BP2
ENSG00000174279	-3.00796	down	0.00867651	EVX2
ENSG00000205277	-3.00872	down	0.00831264	MUC12
ENSG00000259065	-3.00946	down	0.0151966	RP5-1021I20.1
ENSG00000129244	-3.01728	down	0.0079844	ATP1B2
ENSG00000226010	-3.05472	down	0.00595135	RP11-403E24.1
ENSG00000255522	-3.06071	down	0.00480446	RP13-726E6.3
ENSG00000267785	-3.09972	down	4.52045e-06	CTD-3194G12.2
ENSG00000185681	-3.10233	down	0.00964887	MORN5
ENSG00000233623	-3.10288	down	0.0145234	PGAM1P11
ENSG00000237976	-3.10589	down	0.00905359	RP11-126K1.6
ENSG00000162068	-3.11286	down	0.00884179	NTN3
ENSG00000251291	-3.11714	down	0.00701201	RP11-400D2.3
ENSG00000055813	-3.12734	down	0.00704505	CCDC85A
ENSG00000232994	-3.1307	down	9.26634e-06	RPL7P14
ENSG00000226912	-3.1308	down	0.0118871	ISCA2P1
ENSG00000061918	-3.13392	down	0.00506104	GUCY1B3
ENSG00000237254	-3.13619	down	0.00803254	TRBV30
ENSG00000229359	-3.15125	down	0.0136207	PIN1P1
ENSG00000260947	-3.15125	down	0.0090102	RP11-384P7.7
ENSG00000249807	-3.15182	down	0.00667533	CTD-2199O4.1
ENSG00000184979	-3.15707	down	4.49967e-11	USP18
ENSG00000237628	-3.16924	down	2.04355e-05	RP11-522L3.4
ENSG00000260782	-3.17235	down	0.00247647	RP11-480G7.2
ENSG00000179862	-3.17394	down	0.000572864	CITED4
ENSG00000272459	-3.18775	down	0.00168023	RP11-1277A3.3
ENSG00000261055	-3.19157	down	0.00160323	RP11-195M16.3
ENSG00000216938	-3.19206	down	0.00382553	GS1-541M1.1
ENSG00000249763	-3.1955	down	0.00603937	RP11-618I10.1
ENSG00000266138	-3.20244	down	0.00871794	RN7SL501P
ENSG00000248968	-3.20601	down	0.00484278	CTD-2256P15.1
ENSG00000113430	-3.20695	down	0.00417746	IRX4
ENSG00000175189	-3.20988	down	0.000108675	INHBC
ENSG00000232613	-3.2099	down	0.00662737	AC007386.4
ENSG00000124664	-3.21391	down	0.0145461	SPDEF
ENSG00000232305	-3.21564	down	0.00462706	CLCP1
ENSG00000237977	-3.21603	down	0.0074203	EIF4HP2
ENSG00000225937	-3.22144	down	0.00590629	PCA3
ENSG00000261630	-3.22383	down	0.00446959	RP11-357N13.3
ENSG00000269054	-3.22406	down	0.00363444	CTD-2619J13.3
ENSG00000241597	-3.23135	down	0.00344048	CTD-2007H13.1
ENSG00000267849	-3.2508	down	0.00376805	AL133262.1
ENSG00000214402	-3.2666	down	0.000398052	LCNL1
ENSG00000135638	-3.27012	down	0.00312231	EMX1
ENSG00000272482	-3.27615	down	9.21185e-08	RP11-474O21.5
ENSG00000184361	-3.27759	down	0.00624806	SPATA32
ENSG00000144278	-3.27938	down	0.00174591	GALNT13
ENSG00000073737	-3.2839	down	2.40358e-06	DHRS9
ENSG00000227917	-3.28596	down	0.00547264	RP11-143M1.3
ENSG00000142627	-3.31783	down	0.0110441	EPHA2
ENSG00000121743	-3.32338	down	0.00485577	GJA3
ENSG00000258609	-3.32803	down	0.000825058	LINC-ROR
ENSG00000242902	-3.32809	down	0.00285891	RP11-309L24.2
ENSG00000241179	-3.3321	down	0.00735321	CTB-2L9.1
ENSG00000141738	-3.35257	down	0.00402372	GRB7
ENSG00000259687	-3.37201	down	0.0117994	RP11-293M10.5
ENSG00000182568	-3.39333	down	0.000483061	SATB1
ENSG00000272689	-3.40262	down	0.00437151	RP4-539M6.21
ENSG00000163736	-3.41529	down	0.00839528	PPBP
ENSG00000238168	-3.43599	down	0.000530117	RP11-686G8.1
ENSG00000161243	-3.44352	down	4.57153e-05	FBXO27
ENSG00000214190	-3.44924	down	0.00245899	RP11-12D24.7
ENSG00000266111	-3.45966	down	0.0108329	RP11-296K13.4
ENSG00000242651	-3.46108	down	0.0013819	RN7SL862P
ENSG00000017373	-3.47419	down	0.000115606	SRCIN1
ENSG00000135226	-3.48237	down	7.40984e-06	UGT2B28
ENSG00000227218	-3.49033	down	0.00422675	RP11-203J24.8
ENSG00000267230	-3.49132	down	0.00515042	RP11-376M2.2
ENSG00000266654	-3.49368	down	0.00585242	RP11-1376P16.1
ENSG00000258947	-3.49521	down	0.000940827	TUBB3
ENSG00000257302	-3.51151	down	0.00495547	FAHD2P1
ENSG00000239140	-3.51672	down	0.00185217	snoU13
ENSG00000130600	-3.51946	down	0.00228389	H19
ENSG00000138378	-3.52564	down	4.26559e-07	STAT4
ENSG00000267082	-3.53671	down	0.000284967	CTC-510F12.2
ENSG00000258831	-3.54132	down	0.000967374	RP11-76E17.4
ENSG00000214456	-3.58115	down	0.0012597	PLIN5
ENSG00000240723	-3.59043	down	0.00592886	RN7SL382P
ENSG00000011105	-3.60127	down	0.00164967	TSPAN9
ENSG00000270068	-3.61516	down	0.00237314	RP4-761J14.9
ENSG00000168899	-3.62385	down	0.00341136	VAMP5
ENSG00000163354	-3.63402	down	0.00195977	DCST2
ENSG00000254207	-3.66838	down	0.00263291	RP11-43A14.1
ENSG00000265511	-3.66901	down	0.000527583	RP11-524F11.1
ENSG00000272788	-3.67901	down	0.000143156	RP11-674N23.4
ENSG00000272702	-3.67901	down	0.00113378	RP11-44N22.3
ENSG00000263466	-3.68795	down	0.00225375	RP1-56K13.2
ENSG00000229120	-3.71638	down	0.00683337	RP11-396D18.1
ENSG00000249406	-3.72772	down	0.00202252	RP11-893F2.5
ENSG00000176177	-3.73074	down	0.00300724	ENTHD1
ENSG00000197180	-3.73079	down	0.00165415	BX936347.1
ENSG00000233010	-3.75148	down	0.00222996	RPEP4
ENSG00000130173	-3.77297	down	0.000675509	C19orf80
ENSG00000100427	-3.79089	down	0.00176609	MLC1
ENSG00000271959	-3.82692	down	0.00132436	CTD-3064M3.7
ENSG00000064300	-3.83199	down	4.94166e-06	NGFR
ENSG00000215039	-3.85544	down	0.00228216	CD27-AS1
ENSG00000260466	-3.86023	down	0.00170042	RP4-536B24.2
ENSG00000231029	-3.86599	down	0.000522141	RP3-455J7.3
ENSG00000238948	-3.87335	down	0.00202218	snoU13
ENSG00000238178	-3.87378	down	8.08025e-11	RP11-431J24.2
ENSG00000250930	-3.87502	down	0.00363402	LNX1-AS1
ENSG00000224672	-3.87579	down	0.00409624	AC007272.3
ENSG00000213176	-3.88653	down	0.000153807	RPL13P6
ENSG00000204311	-3.88794	down	0.00199886	DFNB59
ENSG00000234607	-3.89773	down	0.00242129	RP11-5P18.1
ENSG00000265706	-3.90278	down	0.00430422	SNORD53_SNORD92
ENSG00000177984	-3.90953	down	7.23973e-05	LCN15
ENSG00000100346	-3.93324	down	0	CACNA1I
ENSG00000132321	-3.934	down	0.0015706	IQCA1
ENSG00000104814	-3.94146	down	0.00885041	MAP4K1
ENSG00000273367	-3.96713	down	0.000690217	RP5-827C21.6
ENSG00000244295	-4.00066	down	0.0110223	RPS20P21
ENSG00000244563	-4.00352	down	0	AC006011.4
ENSG00000223189	-4.03812	down	0.00794023	RNU6-177P
ENSG00000197405	-4.05394	down	0.00104795	C5AR1
ENSG00000259240	-4.08579	down	0.00313715	RP11-108K3.1
ENSG00000196376	-4.09623	down	0.000735548	SLC35F1
ENSG00000188641	-4.15098	down	0.00475811	DPYD
ENSG00000179388	-4.16236	down	0.000352703	EGR3
ENSG00000265625	-4.17617	down	2.95732e-08	RP11-68I3.11
ENSG00000161249	-4.18444	down	6.2178e-05	DMKN
ENSG00000108771	-4.20161	down	7.95758e-07	DHX58
ENSG00000267735	-4.22395	down	0.00159823	CTD-2265O21.7
ENSG00000235162	-4.23806	down	6.71091e-05	C12orf75
ENSG00000249131	-4.26654	down	0.00125434	CTB-35F21.2
ENSG00000273443	-4.28126	down	0.000911123	RP11-54O7.18
ENSG00000105289	-4.28923	down	3.22441e-10	TJP3
ENSG00000254653	-4.32984	down	5.35194e-06	RP11-702F3.1
ENSG00000100055	-4.41093	down	4.02641e-05	CYTH4
ENSG00000149260	-4.45552	down	0.000151447	CAPN5
ENSG00000105650	-4.46921	down	1.53669e-05	PDE4C
ENSG00000148600	-4.48756	down	0.00023787	CDHR1
ENSG00000109107	-4.5287	down	0	ALDOC
ENSG00000049130	-4.53391	down	5.32257e-05	KITLG
ENSG00000142959	-4.53895	down	0.000407361	BEST4
ENSG00000115648	-4.54569	down	0.000157486	MLPH
ENSG00000161133	-4.55524	down	0.000341995	USP41
ENSG00000198832	-4.5665	down	0.000224986	SELM
ENSG00000140563	-4.57124	down	0.000288167	MCTP2
ENSG00000222005	-4.60947	down	0.00015404	AC016722.1
ENSG00000178631	-4.66083	down	9.82151e-05	ACTG1P1
ENSG00000182798	-4.66831	down	7.21756e-12	MAGEB17
ENSG00000189143	-4.67473	down	0.00241858	CLDN4
ENSG00000237189	-4.67941	down	0.0018099	RP11-85G21.2
ENSG00000268863	-4.69203	down	0.000164291	AC135048.1
ENSG00000240698	-4.73447	down	0.000823392	RPS2P39
ENSG00000234694	-4.81963	down	0.00125669	RP1-92O14.3
ENSG00000101144	-4.86568	down	2.51216e-05	BMP7
ENSG00000224786	-4.92873	down	2.6243e-05	CETN4P
ENSG00000146215	-4.94862	down	9.79061e-07	CRIP3
ENSG00000234509	-4.95502	down	5.66648e-07	AP000253.1
ENSG00000260807	-5.02904	down	3.12965e-05	RP11-161M6.2
ENSG00000153904	-5.03743	down	8.4052e-06	DDAH1
ENSG00000099998	-5.07633	down	7.71769e-06	GGT5
ENSG00000136274	-5.30604	down	9.36398e-06	NACAD
ENSG00000237916	-5.30683	down	0.000200502	RP11-537E18.1
ENSG00000100311	-5.43423	down	4.70071e-11	PDGFB
ENSG00000117245	-5.6031	down	1.2449e-05	KIF17
ENSG00000107317	-5.68104	down	4.81007e-06	PTGDS
ENSG00000233316	-5.73314	down	1.02009e-07	DSCR10
ENSG00000173706	-5.77308	down	8.58142e-08	HEG1
ENSG00000101188	-5.9771	down	1.76975e-05	NTSR1
ENSG00000265745	-6.18126	down	4.75254e-05	RN7SL375P
ENSG00000225272	-6.19919	down	1.82997e-06	RP11-466F5.4
ENSG00000163435	-6.54004	down	4.91725e-06	ELF3
ENSG00000203469	-9.1663	down	1.44425e-06	RP5-1113E3.3
ENSG00000264293	-9.65448	down	3.08494e-10	RN7SL657P
ENSG00000169174	-11.565	down	2.88436e-13	PCSK9
ENSG00000178882	-12.997	down	1.00808e-13	FAM101A
ENSG00000143847	-14.4983	down	0	PPFIA4
ENSG00000247095	-15.8063	down	1.55431e-14	MIR210HG

## Sheet: Table S3
Gene ID	Gene Symbol	Fold Change in Hela	Fold Change in K562	Regulation in Hela	Regulation in K562					ENSG00000169403	PTAFR	3.0818	2.19506	up	up
ENSG00000169403	PTAFR	3.0818	2.19506	up	up					ENSG00000273338	RP11-386I14.4	1.87636	2.62811	up	up
ENSG00000162366	PDZK1IP1	-2.28145	2.22371	down	up					ENSG00000237505	RP11-76N22.2	1.93839	3.27927	up	up
ENSG00000273338	RP11-386I14.4	1.87636	2.62811	up	up					ENSG00000238198	RP11-31F15.2	1.61481	1.58982	up	up
ENSG00000237505	RP11-76N22.2	1.93839	3.27927	up	up					ENSG00000232093	RP11-307C12.11	1.56869	1.7134	up	up
ENSG00000238198	RP11-31F15.2	1.61481	1.58982	up	up					ENSG00000116667	C1orf21	1.7433	1.92649	up	up
ENSG00000232093	RP11-307C12.11	1.56869	1.7134	up	up					ENSG00000177788	RP5-1061H20.4	1.56938	1.8055	up	up
ENSG00000116667	C1orf21	1.7433	1.92649	up	up					ENSG00000231672	DIRC3	2.5922	3.56952	up	up
ENSG00000196878	LAMB3	-1.54047	1.83231	down	up					ENSG00000182533	CAV3	4.90364	3.34647	up	up
ENSG00000229841	RP11-361K17.2	-1.76911	1.55114	down	up					ENSG00000261533	RP11-15N24.4	2.03206	2.38543	up	up
ENSG00000143512	HHIPL2	-3.00262	2.84955	down	up					ENSG00000130997	POLN	1.97591	1.9965	up	up
ENSG00000177788	RP5-1061H20.4	1.56938	1.8055	up	up					ENSG00000188517	COL25A1	2.10371	2.06031	up	up
ENSG00000135960	EDAR	-2.77178	2.68971	down	up					ENSG00000198948	MFAP3L	1.72665	1.79338	up	up
ENSG00000231672	DIRC3	2.5922	3.56952	up	up					ENSG00000152377	SPOCK1	2.24468	2.02023	up	up
ENSG00000066248	NGEF	-1.6614	3.43666	down	up					ENSG00000197083	ZNF300P1	3.42584	2.90374	up	up
ENSG00000182533	CAV3	4.90364	3.34647	up	up					ENSG00000161912	ADCY10P1	1.85779	1.75649	up	up
ENSG00000170011	MYRIP	-2.3477	1.99887	down	up					ENSG00000225264	ZNRF2P2	4.22284	1.98143	up	up
ENSG00000261533	RP11-15N24.4	2.03206	2.38543	up	up					ENSG00000271553	RP11-274B21.10	2.99993	2.78171	up	up
ENSG00000130997	POLN	1.97591	1.9965	up	up					ENSG00000224903	AC005534.8	2.39132	1.65808	up	up
ENSG00000188517	COL25A1	2.10371	2.06031	up	up					ENSG00000164741	DLC1	4.33563	1.60173	up	up
ENSG00000198948	MFAP3L	1.72665	1.79338	up	up					ENSG00000095739	BAMBI	1.55501	1.50499	up	up
ENSG00000152377	SPOCK1	2.24468	2.02023	up	up					ENSG00000234043	RP11-56M3.1	2.70387	3.3489	up	up
ENSG00000197083	ZNF300P1	3.42584	2.90374	up	up					ENSG00000257410	RP11-2H8.2	2.28867	2.51107	up	up
ENSG00000161912	ADCY10P1	1.85779	1.75649	up	up					ENSG00000137869	CYP19A1	2.45004	2.86698	up	up
ENSG00000232818	RPS2P32	-1.82014	2.49507	down	up					ENSG00000129028	THAP10	2.10815	2.93829	up	up
ENSG00000225264	ZNRF2P2	4.22284	1.98143	up	up					ENSG00000267798	RP11-333J10.3	4.81875	3.43005	up	up
ENSG00000238228	OR7E7P	-2.50036	2.68481	down	up					ENSG00000167384	ZNF180	1.51128	1.60151	up	up
ENSG00000185955	C7orf61	-4.4086	2.12128	down	up					ENSG00000205181	LINC00654	3.65022	2.71289	up	up
ENSG00000271553	RP11-274B21.10	2.99993	2.78171	up	up					ENSG00000124215	CDH26	3.71966	3.97808	up	up
ENSG00000226066	AC009541.1	-6.10057	4.85379	down	up					ENSG00000189221	MAOA	2.15763	4.44047	up	up
ENSG00000224903	AC005534.8	2.39132	1.65808	up	up					ENSG00000102003	SYP	2.52189	2.53188	up	up
ENSG00000164741	DLC1	4.33563	1.60173	up	up					ENSG00000241476	SSX2	1.64712	1.53673	up	up
ENSG00000122711	SPINK4	-2.71294	3.44249	down	up					ENSG00000157950	SSX2B	1.87654	1.6419	up	up
ENSG00000160345	C9orf116	-1.57104	3.53659	down	up					ENSG00000217801	RP11-465B22.3	-3.08971	-1.52751	down	down
ENSG00000095739	BAMBI	1.55501	1.50499	up	up					ENSG00000273443	RP11-54O7.18	-2.54934	-4.28126	down	down
ENSG00000151150	ANK3	-1.72393	1.79526	down	up					ENSG00000178821	TMEM52	-2.71782	-2.52446	down	down
ENSG00000234043	RP11-56M3.1	2.70387	3.3489	up	up					ENSG00000203469	RP5-1113E3.3	-44.5814	-9.1663	down	down
ENSG00000254452	RP11-867G23.4	-14.5491	3.45371	down	up					ENSG00000266138	RN7SL501P	-2.96736	-3.20244	down	down
ENSG00000134533	RERG	-1.62277	4.38778	down	up					ENSG00000197587	DMBX1	-2.16655	-2.00505	down	down
ENSG00000110900	TSPAN11	-1.5866	1.91181	down	up					ENSG00000224570	RP11-430H12.2	-7.14013	-1.6758	down	down
ENSG00000166863	TAC3	-1.72971	1.66788	down	up					ENSG00000188641	DPYD	-1.62265	-4.15098	down	down
ENSG00000257410	RP11-2H8.2	2.28867	2.51107	up	up					ENSG00000237976	RP11-126K1.6	-3.13234	-3.10589	down	down
ENSG00000080166	DCT	-2.32015	2.37835	down	up					ENSG00000163463	KRTCAP2	-2.95749	-1.79421	down	down
ENSG00000137869	CYP19A1	2.45004	2.86698	up	up					ENSG00000162746	FCRLB	-3.07091	-1.91064	down	down
ENSG00000129028	THAP10	2.10815	2.93829	up	up					ENSG00000143847	PPFIA4	-1.6894	-14.4983	down	down
ENSG00000197599	CCDC154	-3.2862	2.75692	down	up					ENSG00000187536	TPM3P7	-3.12105	-1.72198	down	down
ENSG00000255509	RP11-445F12.1	-1.8415	2.34198	down	up					ENSG00000135636	DYSF	-2.38246	-1.89156	down	down
ENSG00000267798	RP11-333J10.3	4.81875	3.43005	up	up					ENSG00000214184	AC012487.2	-2.65868	-2.50292	down	down
ENSG00000267473	AC005789.11	-2.93512	3.11112	down	up					ENSG00000244563	AC006011.4	-44.0265	-4.00352	down	down
ENSG00000167384	ZNF180	1.51128	1.60151	up	up					ENSG00000225808	DNAJC19P5	-3.13449	-2.28453	down	down
ENSG00000205181	LINC00654	3.65022	2.71289	up	up					ENSG00000214773	RP11-717D12.1	-2.01059	-1.73225	down	down
ENSG00000101049	SGK2	-2.16681	2.51174	down	up					ENSG00000114268	PFKFB4	-1.50045	-2.126	down	down
ENSG00000124215	CDH26	3.71966	3.97808	up	up					ENSG00000205794	RP11-333E13.4	-1.53971	-1.50368	down	down
ENSG00000230366	DSCR9	-2.47222	2.49282	down	up					ENSG00000248323	LUCAT1	-1.92317	-2.24311	down	down
ENSG00000169314	C22orf15	-1.80461	3.57113	down	up					ENSG00000249249	AC010226.4	-3.22486	-1.89849	down	down
ENSG00000223704	RP1-90L6.2	-1.73624	2.07417	down	up					ENSG00000267849	AL133262.1	-3.34443	-3.2508	down	down
ENSG00000189221	MAOA	2.15763	4.44047	up	up					ENSG00000005700	IBTK	-2.91688	-2.43841	down	down
ENSG00000102003	SYP	2.52189	2.53188	up	up					ENSG00000131015	ULBP2	-2.20053	-2.79905	down	down
ENSG00000049769	PPP1R3F	-1.80691	2.60354	down	up					ENSG00000167123	CERCAM	-1.89218	-2.05336	down	down
ENSG00000241476	SSX2	1.64712	1.53673	up	up					ENSG00000172889	EGFL7	-1.59865	-1.7749	down	down
ENSG00000157950	SSX2B	1.87654	1.6419	up	up					ENSG00000107317	PTGDS	-2.77679	-5.68104	down	down
ENSG00000102359	SRPX2	-2.98945	2.49757	down	up					ENSG00000214402	LCNL1	-2.07269	-3.2666	down	down
ENSG00000217801	RP11-465B22.3	-3.08971	-1.52751	down	down					ENSG00000270427	NRBF2P5	-2.56313	-1.91523	down	down
ENSG00000273443	RP11-54O7.18	-2.54934	-4.28126	down	down					ENSG00000165507	C10orf10	-4.91682	-1.58163	down	down
ENSG00000178821	TMEM52	-2.71782	-2.52446	down	down					ENSG00000247095	MIR210HG	-1.73796	-15.8063	down	down
ENSG00000203469	RP5-1113E3.3	-44.5814	-9.1663	down	down					ENSG00000245156	RP11-867G23.3	-4.05394	-2.26922	down	down
ENSG00000266138	RN7SL501P	-2.96736	-3.20244	down	down					ENSG00000149260	CAPN5	-3.80058	-4.45552	down	down
ENSG00000197587	DMBX1	-2.16655	-2.00505	down	down					ENSG00000215039	CD27-AS1	-1.64163	-3.85544	down	down
ENSG00000224570	RP11-430H12.2	-7.14013	-1.6758	down	down					ENSG00000111711	GOLT1B	-1.58842	-1.61489	down	down
ENSG00000188641	DPYD	-1.62265	-4.15098	down	down					ENSG00000258021	RP11-1100L3.4	-1.85921	-1.65721	down	down
ENSG00000237976	RP11-126K1.6	-3.13234	-3.10589	down	down					ENSG00000235162	C12orf75	-2.46099	-4.23806	down	down
ENSG00000163463	KRTCAP2	-2.95749	-1.79421	down	down					ENSG00000178882	FAM101A	-14.3052	-12.997	down	down
ENSG00000162746	FCRLB	-3.07091	-1.91064	down	down					ENSG00000100968	NFATC4	-1.53289	-1.55545	down	down
ENSG00000116741	RGS2	2.22727	-2.13514	up	down					ENSG00000100934	SEC23A	-1.54023	-1.70038	down	down
ENSG00000203721	LINC00862	2.90832	-2.53031	up	down					ENSG00000258378	RP11-517O13.1	-5.08052	-2.18813	down	down
ENSG00000143847	PPFIA4	-1.6894	-14.4983	down	down					ENSG00000167549	CORO6	-1.51537	-2.03484	down	down
ENSG00000187536	TPM3P7	-3.12105	-1.72198	down	down					ENSG00000265739	RP11-354P11.3	-2.76144	-1.54765	down	down
ENSG00000135636	DYSF	-2.38246	-1.89156	down	down					ENSG00000273284	RP11-888D10.4	-1.6888	-2.19937	down	down
ENSG00000214184	AC012487.2	-2.65868	-2.50292	down	down					ENSG00000105289	TJP3	-1.57794	-4.28923	down	down
ENSG00000244563	AC006011.4	-44.0265	-4.00352	down	down					ENSG00000125730	C3	-1.84325	-1.97654	down	down
ENSG00000225808	DNAJC19P5	-3.13449	-2.28453	down	down					ENSG00000267735	CTD-2265O21.7	-9.89142	-4.22395	down	down
ENSG00000204311	DFNB59	2.88363	-3.88794	up	down					ENSG00000130477	UNC13A	-1.52489	-1.60261	down	down
ENSG00000123999	INHA	2.52595	-1.75299	up	down					ENSG00000105650	PDE4C	-1.51692	-4.46921	down	down
ENSG00000214773	RP11-717D12.1	-2.01059	-1.73225	down	down					ENSG00000142552	RCN3	-1.55185	-2.80392	down	down
ENSG00000114268	PFKFB4	-1.50045	-2.126	down	down					ENSG00000269526	ERVV-1	-2.91363	-2.63427	down	down
ENSG00000203632	AC007690.1	2.04645	-1.58412	up	down					ENSG00000101335	MYL9	-1.83106	-2.19004	down	down
ENSG00000205794	RP11-333E13.4	-1.53971	-1.50368	down	down					ENSG00000100031	GGT1	-1.50569	-1.89439	down	down
ENSG00000250980	RP11-529H22.1	3.7707	-2.03781	up	down
ENSG00000248323	LUCAT1	-1.92317	-2.24311	down	down
ENSG00000249249	AC010226.4	-3.22486	-1.89849	down	down
ENSG00000249803	RP11-114H21.2	1.98897	-2.24598	up	down
ENSG00000120738	EGR1	2.18987	-1.88406	up	down
ENSG00000187475	HIST1H1T	7.6724	-1.54523	up	down
ENSG00000180316	PNPLA1	2.45004	-1.6168	up	down
ENSG00000267849	AL133262.1	-3.34443	-3.2508	down	down
ENSG00000005700	IBTK	-2.91688	-2.43841	down	down
ENSG00000131015	ULBP2	-2.20053	-2.79905	down	down
ENSG00000254207	RP11-43A14.1	2.79469	-3.66838	up	down
ENSG00000203499	FAM83H-AS1	1.52649	-1.63209	up	down
ENSG00000165030	NFIL3	1.57701	-1.63618	up	down
ENSG00000167123	CERCAM	-1.89218	-2.05336	down	down
ENSG00000172889	EGFL7	-1.59865	-1.7749	down	down
ENSG00000107317	PTGDS	-2.77679	-5.68104	down	down
ENSG00000214402	LCNL1	-2.07269	-3.2666	down	down
ENSG00000270427	NRBF2P5	-2.56313	-1.91523	down	down
ENSG00000165507	C10orf10	-4.91682	-1.58163	down	down
ENSG00000247095	MIR210HG	-1.73796	-15.8063	down	down
ENSG00000226416	MRPL23-AS1	1.88009	-1.5485	up	down
ENSG00000245156	RP11-867G23.3	-4.05394	-2.26922	down	down
ENSG00000149260	CAPN5	-3.80058	-4.45552	down	down
ENSG00000215039	CD27-AS1	-1.64163	-3.85544	down	down
ENSG00000111711	GOLT1B	-1.58842	-1.61489	down	down
ENSG00000258021	RP11-1100L3.4	-1.85921	-1.65721	down	down
ENSG00000235162	C12orf75	-2.46099	-4.23806	down	down
ENSG00000178882	FAM101A	-14.3052	-12.997	down	down
ENSG00000100968	NFATC4	-1.53289	-1.55545	down	down
ENSG00000100934	SEC23A	-1.54023	-1.70038	down	down
ENSG00000258378	RP11-517O13.1	-5.08052	-2.18813	down	down
ENSG00000167549	CORO6	-1.51537	-2.03484	down	down
ENSG00000265739	RP11-354P11.3	-2.76144	-1.54765	down	down
ENSG00000265666	CTD-2267D19.2	1.81135	-2.5016	up	down
ENSG00000273284	RP11-888D10.4	-1.6888	-2.19937	down	down
ENSG00000105289	TJP3	-1.57794	-4.28923	down	down
ENSG00000125730	C3	-1.84325	-1.97654	down	down
ENSG00000105088	OLFM2	1.7021	-2.12462	up	down
ENSG00000267082	CTC-510F12.2	3.17078	-3.53671	up	down
ENSG00000267735	CTD-2265O21.7	-9.89142	-4.22395	down	down
ENSG00000269481	CTD-2521M24.6	3.58046	-2.00135	up	down
ENSG00000130477	UNC13A	-1.52489	-1.60261	down	down
ENSG00000105650	PDE4C	-1.51692	-4.46921	down	down
ENSG00000104814	MAP4K1	8.12815	-3.94146	up	down
ENSG00000104888	SLC17A7	2.41369	-1.69596	up	down
ENSG00000142552	RCN3	-1.55185	-2.80392	down	down
ENSG00000269526	ERVV-1	-2.91363	-2.63427	down	down
ENSG00000101335	MYL9	-1.83106	-2.19004	down	down
ENSG00000225806	RP1-309F20.3	1.81277	-2.31814	up	down
ENSG00000100031	GGT1	-1.50569	-1.89439	down	down
ENSG00000272689	RP4-539M6.21	7.23207	-3.40262	up	down

## Sheet: Table S4
Alternative 3' Splicing
GeneID	geneSymbol	chr	strand	PValue	FDR	IncLevelDifference
ENSG00000161960	EIF4A1	chr17	+	0	0	0.835
ENSG00000197555	SIPA1L1	chr14	+	5.86664e-12	8.01676e-09	0.657
ENSG00000135164	DMTF1	chr7	+	1.18387e-10	1.07851e-07	0.605
ENSG00000183853	KIRREL	chr1	+	7.14723e-10	4.88334e-07	0.524
ENSG00000173230	GOLGB1	chr3	-	2.33776e-08	1.27782e-05	0.5
ENSG00000154845	PPP4R1	chr18	-	5.82791e-08	2.65461e-05	0.47
ENSG00000170854	MINA	chr3	-	1.60477e-07	6.26547e-05	0.37
ENSG00000154957	ZNF18	chr17	-	2.72457e-07	9.30782e-05	0.427
ENSG00000099331	MYO9B	chr19	+	3.88087e-07	0.000117849	-0.667
ENSG00000141642	ELAC1	chr18	+	2.24563e-06	0.000597131	0.485
ENSG00000160298	C21orf58	chr21	-	2.40338e-06	0.000597131	0.544
ENSG00000089280	FUS	chr16	+	4.05925e-06	0.00077406	0.331
ENSG00000213593	TMX2	chr11	+	4.11807e-06	0.00077406	0.364
ENSG00000213593	TMX2	chr11	+	4.24841e-06	0.00077406	0.326
ENSG00000129292	PHF20L1	chr8	+	9.2616e-06	0.001582	-0.225
ENSG00000257923	CUX1	chr7	+	1.17778e-05	0.00189346	0.234
ENSG00000032444	PNPLA6	chr19	+	1.62908e-05	0.00247348	0.497
ENSG00000197603	C5orf42	chr5	-	2.24083e-05	0.00322326	0.203
ENSG00000121310	ECHDC2	chr1	-	3.93504e-05	0.00531093	-0.308
ENSG00000198131	ZNF544	chr19	+	4.08084e-05	0.00531093	0.168
ENSG00000111799	COL12A1	chr6	-	4.83083e-05	0.00600121	0.128
ENSG00000041988	THAP3	chr1	+	7.95448e-05	0.00845337	-0.384
ENSG00000132781	MUTYH	chr1	-	8.04199e-05	0.00845337	0.281
ENSG00000116001	TIA1	chr2	-	8.64941e-05	0.00875513	0.179
ENSG00000167925	GHDC	chr17	-	9.14094e-05	0.00892221	0.484
ENSG00000075303	SLC25A40	chr7	-	0.000103232	0.00949884	-0.195
ENSG00000177200	CHD9	chr16	+	0.000104268	0.00949884	0.559
ENSG00000188818	ZDHHC11	chr5	-	0.000129542	0.0114206	0.201
ENSG00000070814	TCOF1	chr5	+	0.000144495	0.0122689	0.163
ENSG00000174365	SNHG11	chr20	+	0.000148142	0.0122689	0.465
ENSG00000163697	APBB2	chr4	-	0.000175687	0.0139512	-0.514
ENSG00000064012	CASP8	chr2	+	0.000181976	0.0139512	0.225
ENSG00000008710	PKD1	chr16	-	0.00018377	0.0139512	0.667
ENSG00000068650	ATP11A	chr13	+	0.00019742	0.0143044	-0.388
ENSG00000068650	ATP11A	chr13	+	0.000204125	0.0143044	-0.371
ENSG00000175787	ZNF169	chr9	+	0.000224641	0.0149215	0.514
ENSG00000083544	TDRD3	chr13	+	0.00022931	0.0149215	-0.61
ENSG00000139436	GIT2	chr12	-	0.000256366	0.0162941	0.506
ENSG00000108395	TRIM37	chr17	-	0.000277539	0.0171983	-0.122
ENSG00000148200	NR6A1	chr9	-	0.000285045	0.0171983	-0.276
ENSG00000106348	IMPDH1	chr7	-	0.00028947	0.0171983	0.403
ENSG00000132600	PRMT7	chr16	+	0.000300685	0.0174845	0.219
ENSG00000205581	HMGN1	chr21	-	0.000321006	0.0182773	0.167
ENSG00000185946	RNPC3	chr1	+	0.000332127	0.0185246	0.188
ENSG00000167965	MLST8	chr16	+	0.000355224	0.0194165	0.108
ENSG00000174669	SLC29A2	chr11	-	0.000362671	0.0194349	0.337
ENSG00000111602	TIMELESS	chr12	-	0.00037662	0.0197943	0.105
ENSG00000161960	EIF4A1	chr17	+	0.000400601	0.0202749	0.333
ENSG00000136811	ODF2	chr9	+	0.000528981	0.0262855	0.126
ENSG00000124784	RIOK1	chr6	+	0.000552683	0.0269729	-0.112
ENSG00000155545	MIER3	chr5	-	0.000581921	0.0279016	-0.444
ENSG00000137872	SEMA6D	chr15	+	0.000605945	0.0284368	0.328
ENSG00000100288	CHKB	chr22	-	0.000613893	0.0284368	0.137
ENSG00000006704	GTF2IRD1	chr7	+	0.000684437	0.030665	-0.213
ENSG00000149150	SLC43A1	chr11	-	0.000714739	0.0315062	-0.174
ENSG00000228106	RP11-452F19.3	chr1	+	0.000765646	0.0326955	0.118
ENSG00000125731	SH2D3A	chr19	-	0.000806084	0.0338927	0.256
ENSG00000142528	ZNF473	chr19	+	0.000858835	0.0347367	0.436
ENSG00000157540	DYRK1A	chr21	+	0.000860782	0.0347367	-0.104
ENSG00000127463	EMC1	chr1	-	0.000864287	0.0347367	0.24
ENSG00000163781	TOPBP1	chr3	-	0.000904996	0.0358457	0.332
ENSG00000132773	TOE1	chr1	+	0.0009381	0.0366261	0.535
ENSG00000100644	HIF1A	chr14	+	0.00104074	0.0400613	-0.201
ENSG00000172493	AFF1	chr4	+	0.00117685	0.0446714	-0.197
ENSG00000132466	ANKRD17	chr4	-	0.00120589	0.0451467	0.217
ENSG00000082269	FAM135A	chr6	+	0.00126486	0.0467145	0.392
ENSG00000146067	FAM193B	chr5	-	0.00130458	0.0475388	0.334
ENSG00000135317	SNX14	chr6	-	0.00134181	0.0479038	0.181
ENSG00000170889	RPS9	chr19	+	0.00147243	0.0515918	0.177
ENSG00000076053	RBM7	chr11	+	0.00156181	0.0536564	0.262
ENSG00000105726	ATP13A1	chr19	-	0.00157062	0.0536564	-0.221
ENSG00000121716	PILRB	chr7	+	0.0016408	0.05499	0.215
ENSG00000119599	DCAF4	chr14	+	0.00165689	0.05499	0.377
ENSG00000225697	SLC26A6	chr3	-	0.00185331	0.0596044	-0.139
ENSG00000168036	CTNNB1	chr3	+	0.00185378	0.0596044	0.117
ENSG00000095485	CWF19L1	chr10	-	0.00188723	0.0599744	-0.58
ENSG00000157353	FUK	chr16	+	0.00205793	0.0646475	-0.187
ENSG00000137804	NUSAP1	chr15	+	0.00211099	0.0646942	-0.133
ENSG00000196678	ERI2	chr16	-	0.0021541	0.0646942	0.162
ENSG00000124279	FASTKD3	chr5	-	0.00222161	0.0659962	-0.184
ENSG00000075702	WDR62	chr19	+	0.00242733	0.0713322	0.108
ENSG00000161265	U2AF1L4	chr19	-	0.00265908	0.0773114	0.298
ENSG00000135870	RC3H1	chr1	-	0.0027118	0.0780141	0.241
ENSG00000101166	SLMO2	chr20	-	0.00303514	0.0850649	-0.119
ENSG00000134419	RPS15A	chr16	-	0.00324086	0.0894673	0.228
ENSG00000135336	ORC3	chr6	+	0.00334462	0.0914084	0.424
ENSG00000136279	DBNL	chr7	+	0.00359005	0.0961922	0.346
ENSG00000105705	SUGP1	chr19	-	0.00386301	0.101595	0.197
ENSG00000163584	RPL22L1	chr3	-	0.00386605	0.101595	-0.177
ENSG00000114388	NPRL2	chr3	-	0.00407166	0.1042	0.314
ENSG00000142330	CAPN10	chr2	+	0.00413249	0.1042	0.129
ENSG00000111271	ACAD10	chr12	+	0.00417746	0.1042	0.243
ENSG00000150961	SEC24D	chr4	-	0.00427035	0.105143	-0.497
ENSG00000178999	AURKB	chr17	-	0.00431757	0.105356	-0.255
ENSG00000110906	KCTD10	chr12	-	0.00449836	0.108797	0.465
ENSG00000004700	RECQL	chr12	-	0.00463761	0.11118	0.192
ENSG00000121716	PILRB	chr7	+	0.00478805	0.112808	-0.188
ENSG00000140443	IGF1R	chr15	+	0.00492294	0.114995	0.198
ENSG00000054654	SYNE2	chr14	+	0.0050163	0.116182	-0.187
ENSG00000040633	PHF23	chr17	-	0.00513593	0.117954	0.117
ENSG00000168894	RNF181	chr2	+	0.00527713	0.120154	0.533
ENSG00000125967	NECAB3	chr20	-	0.00546046	0.121898	-0.145
ENSG00000099875	MKNK2	chr19	-	0.00551748	0.121898	-0.24
ENSG00000171824	EXOSC10	chr1	-	0.00553824	0.121898	-0.174
ENSG00000187607	ZNF286A	chr17	+	0.00583377	0.126516	0.28
ENSG00000075391	RASAL2	chr1	+	0.00626053	0.133672	-0.348
ENSG00000116793	PHTF1	chr1	-	0.00653826	0.13852	-0.264
ENSG00000159685	CHCHD6	chr3	+	0.00693195	0.144619	-0.11
ENSG00000175575	PAAF1	chr11	+	0.00711554	0.147324	0.295
ENSG00000123240	OPTN	chr10	+	0.00726697	0.148398	-0.289
ENSG00000124357	NAGK	chr2	+	0.00735729	0.148398	0.192
ENSG00000176623	RMDN1	chr8	-	0.00744439	0.148398	-0.11
ENSG00000054654	SYNE2	chr14	+	0.00748623	0.148398	-0.122
ENSG00000100897	DCAF11	chr14	+	0.00749319	0.148398	0.169
ENSG00000126226	PCID2	chr13	-	0.00810492	0.156111	0.146
ENSG00000049192	ADAMTS6	chr5	-	0.00811117	0.156111	-0.383
ENSG00000158636	C11orf30	chr11	+	0.00834783	0.158435	0.228
ENSG00000107331	ABCA2	chr9	-	0.00850866	0.160374	0.428
ENSG00000110075	PPP6R3	chr11	+	0.00887247	0.166085	-0.436
ENSG00000160298	C21orf58	chr21	-	0.00913749	0.169883	-0.109
ENSG00000071054	MAP4K4	chr2	+	0.00937723	0.172309	-0.433
ENSG00000141013	GAS8	chr16	+	0.00939409	0.172309	0.127
ENSG00000130175	PRKCSH	chr19	+	0.00951079	0.173048	0.356
ENSG00000179195	ZNF664	chr12	+	0.0099808	0.179457	0.142
ENSG00000133794	ARNTL	chr11	+	0.0102164	0.18138	0.236
ENSG00000111325	OGFOD2	chr12	+	0.0106531	0.183952	-0.353
ENSG00000180376	CCDC66	chr3	+	0.0107098	0.183952	0.512
ENSG00000226232	RP11-419C5.2	chr16	-	0.0107669	0.183952	-0.249
ENSG00000122644	ARL4A	chr7	+	0.0108365	0.183952	-0.205
ENSG00000143363	PRUNE	chr1	+	0.0113711	0.190658	0.286
ENSG00000214078	CPNE1	chr20	-	0.0115859	0.193074	0.13
ENSG00000012171	SEMA3B	chr3	+	0.0118865	0.195698	-0.205
ENSG00000177189	RPS6KA3	chrX	-	0.0127572	0.207532	0.116
ENSG00000065328	MCM10	chr10	+	0.01404	0.225713	-0.128
ENSG00000157353	FUK	chr16	+	0.0143005	0.226632	0.267
ENSG00000143379	SETDB1	chr1	+	0.0143249	0.226632	0.175
ENSG00000102710	SUPT20H	chr13	-	0.0145169	0.226632	0.2
ENSG00000119760	SUPT7L	chr2	-	0.0145965	0.226632	-0.201
ENSG00000077150	NFKB2	chr10	+	0.0146248	0.226632	-0.262
ENSG00000132781	MUTYH	chr1	-	0.0152063	0.232172	0.198
ENSG00000141013	GAS8	chr16	+	0.0154194	0.232694	0.101
ENSG00000068323	TFE3	chrX	-	0.0155491	0.232694	-0.335
ENSG00000175110	MRPS22	chr3	+	0.0160171	0.237907	0.147
ENSG00000221968	FADS3	chr11	-	0.0162376	0.239877	-0.103
ENSG00000156304	SCAF4	chr21	-	0.0168063	0.246944	-0.353
ENSG00000213918	DNASE1	chr16	+	0.0179282	0.256639	0.244
ENSG00000102901	CENPT	chr16	-	0.017936	0.256639	-0.106
ENSG00000217930	PAM16	chr16	-	0.0180295	0.256639	0.381
ENSG00000050748	MAPK9	chr5	-	0.0184928	0.258323	-0.14
ENSG00000129292	PHF20L1	chr8	+	0.018715	0.258323	0.468
ENSG00000102901	CENPT	chr16	-	0.0189204	0.259846	-0.102
ENSG00000114019	AMOTL2	chr3	-	0.0192271	0.261431	0.114
ENSG00000023330	ALAS1	chr3	+	0.0195934	0.265093	-0.455
ENSG00000122565	CBX3	chr7	+	0.0203523	0.273017	0.155
ENSG00000039650	PNKP	chr19	-	0.0203789	0.273017	0.511
ENSG00000144395	CCDC150	chr2	+	0.020909	0.277399	0.229
ENSG00000205531	NAP1L4	chr11	-	0.0214929	0.279715	-0.333
ENSG00000082213	C5orf22	chr5	+	0.0216578	0.280525	0.176
ENSG00000143353	LYPLAL1	chr1	+	0.0223283	0.286962	-0.263
ENSG00000109046	WSB1	chr17	+	0.0232052	0.293067	0.231
ENSG00000143569	UBAP2L	chr1	+	0.0235113	0.294754	0.346
ENSG00000171681	ATF7IP	chr12	+	0.0241853	0.299426	-0.245
ENSG00000111206	FOXM1	chr12	-	0.0243157	0.299426	0.156
ENSG00000166197	NOLC1	chr10	+	0.0245451	0.299426	-0.137
ENSG00000051825	MPHOSPH9	chr12	-	0.0246172	0.299426	-0.138
ENSG00000061273	HDAC7	chr12	-	0.0250199	0.301377	-0.173
ENSG00000000457	SCYL3	chr1	-	0.025032	0.301377	0.112
ENSG00000134802	SLC43A3	chr11	-	0.0282338	0.331171	0.312
ENSG00000187239	FNBP1	chr9	-	0.0287433	0.335707	-0.138
ENSG00000073350	LLGL2	chr17	+	0.0290399	0.336465	0.438
ENSG00000154429	CCSAP	chr1	-	0.0290544	0.336465	0.469
ENSG00000167291	TBC1D16	chr17	-	0.0309698	0.351169	0.196
ENSG00000100416	TRMU	chr22	+	0.0310951	0.351169	-0.297
ENSG00000171307	ZDHHC16	chr10	+	0.031292	0.351938	-0.126
ENSG00000138459	SLC35A5	chr3	+	0.0320802	0.357858	0.11
ENSG00000048707	VPS13D	chr1	+	0.0330857	0.361693	-0.333
ENSG00000114867	EIF4G1	chr3	+	0.0334961	0.362679	-0.156
ENSG00000171163	ZNF692	chr1	-	0.033574	0.362679	-0.198
ENSG00000004897	CDC27	chr17	-	0.0340055	0.364459	0.224
ENSG00000213672	NCKIPSD	chr3	-	0.0346339	0.366935	0.214
ENSG00000113648	H2AFY	chr5	-	0.0347735	0.366935	0.15
ENSG00000131503	ANKHD1	chr5	+	0.0352481	0.367683	0.166
ENSG00000100416	TRMU	chr22	+	0.0356109	0.369015	-0.237
ENSG00000086848	ALG9	chr11	-	0.0356643	0.369015	0.318
ENSG00000225241	RP11-640M9.2	chr1	+	0.0357808	0.369015	-0.198
ENSG00000100908	EMC9	chr14	-	0.0370242	0.379995	0.441
ENSG00000012048	BRCA1	chr17	-	0.037403	0.381427	0.152
ENSG00000125485	DDX31	chr9	-	0.0376144	0.382157	0.408
ENSG00000101247	NDUFAF5	chr20	+	0.0378715	0.383344	0.448
ENSG00000147421	HMBOX1	chr8	+	0.0386057	0.387143	0.127
ENSG00000171469	ZNF561	chr19	-	0.0386718	0.387143	0.383
ENSG00000061938	TNK2	chr3	-	0.0388712	0.387719	-0.307
ENSG00000076382	SPAG5	chr17	-	0.0391173	0.388755	0.213
ENSG00000162613	FUBP1	chr1	-	0.0400548	0.395198	-0.141
ENSG00000103197	TSC2	chr16	+	0.0412145	0.400356	0.274
ENSG00000137996	RTCA	chr1	+	0.0421279	0.403985	-0.114
ENSG00000164180	TMEM161B	chr5	-	0.0431054	0.411912	-0.107
ENSG00000099899	TRMT2A	chr22	-	0.0438522	0.417589	0.139
ENSG00000156504	FAM122B	chrX	-	0.0444363	0.421173	-0.153
ENSG00000100150	DEPDC5	chr22	+	0.0449581	0.423692	0.731
ENSG00000134313	KIDINS220	chr2	-	0.0452312	0.424048	-0.411
ENSG00000071626	DAZAP1	chr19	+	0.0455095	0.424496	0.114
ENSG00000110906	KCTD10	chr12	-	0.0463429	0.4308	0.258
ENSG00000055070	SZRD1	chr1	+	0.0474704	0.435621	-0.27
ENSG00000140534	TICRR	chr15	+	0.04753	0.435621	0.135
ENSG00000171163	ZNF692	chr1	-	0.0478131	0.435621	-0.195
ENSG00000196118	C16orf93	chr16	-	0.0478179	0.435621	-0.333
ENSG00000203705	TATDN3	chr1	+	0.0486211	0.440005	0.378
ENSG00000102710	SUPT20H	chr13	-	0.0493374	0.442376	0.264
ENSG00000020577	SAMD4A	chr14	+	0.0497139	0.442567	-0.237

## Sheet: Table S5
Skipped Exons
GeneID	geneSymbol	chr	strand	PValue	FDR	IncLevelDifference
ENSG00000063245	EPN1	chr19	+	2.06946e-13	4.2606e-09	0.958
ENSG00000188266	AGPHD1	chr15	+	4.20664e-13	4.33031e-09	0.804
ENSG00000143537	ADAM15	chr1	+	1.24052e-11	8.51327e-08	0.747
ENSG00000244754	N4BP2L2	chr13	-	2.9754e-11	1.53144e-07	0.723
ENSG00000121417	ZNF211	chr19	+	1.21815e-10	5.01586e-07	-0.837
ENSG00000163291	PAQR3	chr4	-	2.15596e-10	7.39781e-07	-0.754
ENSG00000179409	GEMIN4	chr17	-	5.1804e-10	1.52363e-06	0.777
ENSG00000148950	IMMP1L	chr11	-	5.42377e-09	1.30717e-05	0.929
ENSG00000135636	DYSF	chr2	+	5.71427e-09	1.30717e-05	0.727
ENSG00000168591	TMUB2	chr17	+	6.3928e-09	1.31615e-05	0.544
ENSG00000135049	AGTPBP1	chr9	-	9.50996e-09	1.77992e-05	-0.424
ENSG00000119004	CYP20A1	chr2	+	1.49348e-08	2.56231e-05	-0.37
ENSG00000130723	PRRC2B	chr9	+	4.05557e-08	5.964e-05	-0.258
ENSG00000131797	CLUHP3	chr16	+	6.97887e-08	9.09787e-05	0.667
ENSG00000119004	CYP20A1	chr2	+	7.69713e-08	9.09787e-05	-0.279
ENSG00000111678	C12orf57	chr12	+	8.08806e-08	9.09787e-05	-0.322
ENSG00000110274	CEP164	chr11	+	8.27081e-08	9.09787e-05	0.754
ENSG00000132953	XPO4	chr13	-	8.39613e-08	9.09787e-05	-0.275
ENSG00000154310	TNIK	chr3	-	1.13906e-07	0.000117255	0.265
ENSG00000164576	SAP30L	chr5	+	1.25022e-07	0.000122569	0.275
ENSG00000242588	RP11-274B21.1	chr7	+	1.61967e-07	0.000151572	-0.78
ENSG00000072071	LPHN1	chr19	-	1.70454e-07	0.000152579	-0.667
ENSG00000136933	RABEPK	chr9	+	1.84086e-07	0.000157915	0.218
ENSG00000100813	ACIN1	chr14	-	2.19727e-07	0.00018095	-0.729
ENSG00000105127	AKAP8	chr19	-	2.40496e-07	0.000190436	0.247
ENSG00000158019	BRE	chr2	+	2.57431e-07	0.000196296	0.184
ENSG00000185187	SIGIRR	chr11	-	2.71279e-07	0.000199468	0.551
ENSG00000182670	TTC3	chr21	+	2.90227e-07	0.000206041	-0.538
ENSG00000135409	AMHR2	chr12	+	3.09423e-07	0.000207913	0.541
ENSG00000138688	KIAA1109	chr4	+	3.20731e-07	0.000207913	0.495
ENSG00000122545	SEPT7	chr7	+	3.2316e-07	0.000207913	0.524
ENSG00000100227	POLDIP3	chr22	-	3.64972e-07	0.000227698	0.503
ENSG00000259431	THTPA	chr14	+	4.88901e-07	0.000296044	0.515
ENSG00000114993	RTKN	chr2	-	5.73596e-07	0.000330625	0.611
ENSG00000135409	AMHR2	chr12	+	5.78128e-07	0.000330625	0.494
ENSG00000166435	XRRA1	chr11	-	6.01915e-07	0.000334925	-0.332
ENSG00000120899	PTK2B	chr8	+	6.20336e-07	0.000336092	-0.296
ENSG00000183742	MACC1	chr7	-	7.01669e-07	0.000370409	-0.482
ENSG00000144674	GOLGA4	chr3	+	7.21934e-07	0.00037158	-0.359
ENSG00000198551	ZNF627	chr19	+	7.50212e-07	0.000376716	0.585
ENSG00000075711	DLG1	chr3	-	7.82543e-07	0.000383595	-0.398
ENSG00000259431	THTPA	chr14	+	8.94085e-07	0.00042808	0.504
ENSG00000138785	INTS12	chr4	-	9.64328e-07	0.000448287	-0.525
ENSG00000259431	THTPA	chr14	+	9.79838e-07	0.000448287	0.5
ENSG00000205581	HMGN1	chr21	-	1.01299e-06	0.000453377	-0.272
ENSG00000151881	C5orf28	chr5	-	1.09136e-06	0.000468758	-0.517
ENSG00000183742	MACC1	chr7	-	1.09289e-06	0.000468758	-0.45
ENSG00000249550	RP11-438N16.1	chr12	-	1.13432e-06	0.000476599	0.527
ENSG00000141644	MBD1	chr18	-	1.2543e-06	0.000516469	0.477
ENSG00000213024	NUP62	chr19	-	1.4987e-06	0.00058869	0.667
ENSG00000149548	CCDC15	chr11	+	1.51547e-06	0.00058869	0.535
ENSG00000113971	NPHP3	chr3	-	1.65245e-06	0.000630014	-0.434
ENSG00000100697	DICER1	chr14	-	1.83116e-06	0.000685455	-0.235
ENSG00000160191	PDE9A	chr21	+	1.9115e-06	0.000702748	0.525
ENSG00000167355	AC104389.28	chr11	-	1.999e-06	0.000722024	0.159
ENSG00000065534	MYLK	chr3	-	2.08149e-06	0.000738858	0.514
ENSG00000134717	BTF3L4	chr1	+	2.42488e-06	0.000843269	0.635
ENSG00000171617	ENC1	chr5	-	2.45755e-06	0.000843269	-0.634
ENSG00000168256	NKIRAS2	chr17	+	2.54741e-06	0.000851493	0.252
ENSG00000087589	CASS4	chr20	+	2.56424e-06	0.000851493	-0.248
ENSG00000177853	ZNF518A	chr10	+	2.79552e-06	0.000913557	-0.413
ENSG00000164978	NUDT2	chr9	+	3.28845e-06	0.00105785	-0.421
ENSG00000171617	ENC1	chr5	-	3.4333e-06	0.00108746	-0.697
ENSG00000141644	MBD1	chr18	-	3.72963e-06	0.00116342	0.521
ENSG00000116957	TBCE	chr1	+	4.17612e-06	0.00128325	-0.175
ENSG00000133195	SLC39A11	chr17	-	4.31763e-06	0.00130723	0.409
ENSG00000003756	RBM5	chr3	+	4.83576e-06	0.00144288	-0.203
ENSG00000155744	FAM126B	chr2	-	5.07701e-06	0.00149322	0.232
ENSG00000079387	SENP1	chr12	-	5.231e-06	0.00151684	-0.254
ENSG00000072134	EPN2	chr17	+	5.39492e-06	0.00154225	-0.316
ENSG00000151881	C5orf28	chr5	-	5.46843e-06	0.00154225	-0.445
ENSG00000139631	CSAD	chr12	-	5.92137e-06	0.00164742	-0.484
ENSG00000181163	NPM1	chr5	+	6.1364e-06	0.00168448	-0.301
ENSG00000196756	RP4-564F22.2	chr20	-	6.67702e-06	0.00180877	-0.367
ENSG00000168256	NKIRAS2	chr17	+	7.05585e-06	0.00188657	0.222
ENSG00000164199	GPR98	chr5	+	8.42697e-06	0.00222429	0.421
ENSG00000233429	HOTAIRM1	chr7	+	8.56535e-06	0.00223219	0.72
ENSG00000003400	CASP10	chr2	+	9.10825e-06	0.00234401	-0.239
ENSG00000160796	NBEAL2	chr3	+	9.23343e-06	0.00234689	0.429
ENSG00000115946	PNO1	chr2	+	9.74092e-06	0.00244568	0.242
ENSG00000029153	ARNTL2	chr12	+	9.93646e-06	0.00246472	-0.521
ENSG00000162714	ZNF496	chr1	-	1.01249e-05	0.00248157	0.201
ENSG00000242086	AC069513.3	chr3	+	1.08047e-05	0.00261702	0.521
ENSG00000087206	UIMC1	chr5	-	1.10543e-05	0.00263037	-0.305
ENSG00000196428	TSC22D2	chr3	+	1.11153e-05	0.00263037	-0.323
ENSG00000242588	RP11-274B21.1	chr7	+	1.27928e-05	0.00296108	-0.338
ENSG00000137720	C11orf1	chr11	+	1.28005e-05	0.00296108	-0.162
ENSG00000125844	RRBP1	chr20	-	1.4471e-05	0.00331033	-0.544
ENSG00000116698	SMG7	chr1	+	1.6285e-05	0.00368435	-0.405
ENSG00000269893	SNHG8	chr4	+	1.65457e-05	0.00370265	0.158
ENSG00000062485	CS	chr12	-	1.87249e-05	0.00413387	0.513
ENSG00000109685	WHSC1	chr4	+	1.88743e-05	0.00413387	-0.224
ENSG00000089123	TASP1	chr20	-	1.91978e-05	0.00416047	0.505
ENSG00000182149	IST1	chr16	+	1.98949e-05	0.00426663	-0.313
ENSG00000233429	HOTAIRM1	chr7	+	2.02812e-05	0.00430463	0.696
ENSG00000198088	NUP62CL	chrX	-	2.08765e-05	0.00438577	0.234
ENSG00000122390	NAA60	chr16	+	2.15406e-05	0.00447958	-0.501
ENSG00000115310	RTN4	chr2	-	2.24808e-05	0.00462835	0.188
ENSG00000164087	POC1A	chr3	-	2.35016e-05	0.00478594	0.32
ENSG00000127481	UBR4	chr1	-	2.37112e-05	0.00478594	0.13
ENSG00000103148	NPRL3	chr16	-	2.40528e-05	0.00480776	-0.357
ENSG00000104147	OIP5	chr15	-	2.66003e-05	0.00526584	-0.268
ENSG00000152256	PDK1	chr2	+	2.77351e-05	0.0054278	-0.259
ENSG00000132670	PTPRA	chr20	+	2.79457e-05	0.0054278	0.127
ENSG00000163875	MEAF6	chr1	-	2.8582e-05	0.00549949	0.11
ENSG00000169660	HEXDC	chr17	+	2.90447e-05	0.00550519	0.589
ENSG00000048991	R3HDM1	chr2	+	2.92857e-05	0.00550519	-0.734
ENSG00000100889	PCK2	chr14	+	2.94138e-05	0.00550519	0.132
ENSG00000136861	CDK5RAP2	chr9	-	3.07046e-05	0.00566912	-0.279
ENSG00000113119	TMCO6	chr5	+	3.08404e-05	0.00566912	0.403
ENSG00000104312	RIPK2	chr8	+	3.47142e-05	0.00632474	-0.255
ENSG00000149187	CELF1	chr11	-	3.53545e-05	0.0063849	0.303
ENSG00000006194	ZNF263	chr16	+	3.63599e-05	0.00650937	0.477
ENSG00000024526	DEPDC1	chr1	-	3.76073e-05	0.0066176	-0.247
ENSG00000165304	MELK	chr9	+	3.84177e-05	0.00668604	-0.149
ENSG00000124721	DNAH8	chr6	+	3.86458e-05	0.00668604	-0.445
ENSG00000133739	LRRCC1	chr8	+	3.99797e-05	0.0068025	0.217
ENSG00000092108	SCFD1	chr14	+	4.20602e-05	0.00709783	-0.217
ENSG00000177556	ATOX1	chr5	-	4.38252e-05	0.00733555	0.16
ENSG00000075711	DLG1	chr3	-	4.46328e-05	0.00741048	0.36
ENSG00000170266	GLB1	chr3	-	4.5869e-05	0.00755481	-0.114
ENSG00000010803	SCMH1	chr1	-	4.64997e-05	0.00759791	0.257
ENSG00000178209	PLEC	chr8	-	4.76792e-05	0.00772929	0.443
ENSG00000101040	ZMYND8	chr20	-	4.87696e-05	0.00777926	-0.156
ENSG00000139631	CSAD	chr12	-	4.9121e-05	0.00777926	-0.357
ENSG00000113360	DROSHA	chr5	-	5.021e-05	0.00783124	-0.209
ENSG00000100227	POLDIP3	chr22	-	5.17498e-05	0.00801071	0.265
ENSG00000006194	ZNF263	chr16	+	5.34099e-05	0.00820599	0.293
ENSG00000087206	UIMC1	chr5	-	5.47905e-05	0.00832026	-0.171
ENSG00000139631	CSAD	chr12	-	5.50045e-05	0.00832026	-0.335
ENSG00000115310	RTN4	chr2	-	5.5366e-05	0.00832026	-0.109
ENSG00000198586	TLK1	chr2	-	5.75573e-05	0.00858688	0.133
ENSG00000175581	MRPL48	chr11	+	5.88862e-05	0.00868856	-0.314
ENSG00000165802	NSMF	chr9	-	5.90829e-05	0.00868856	0.443
ENSG00000108021	FAM208B	chr10	+	5.95101e-05	0.00868932	-0.254
ENSG00000119397	CNTRL	chr9	+	6.16631e-05	0.00894028	0.37
ENSG00000039560	RAI14	chr5	+	6.65656e-05	0.00958359	0.147
ENSG00000005436	GCFC2	chr2	-	6.79483e-05	0.00968179	-0.218
ENSG00000144395	CCDC150	chr2	+	6.81883e-05	0.00968179	0.538
ENSG00000137266	SLC22A23	chr6	-	6.90472e-05	0.00973661	0.259
ENSG00000088179	PTPN4	chr2	+	7.08144e-05	0.00991453	-0.415
ENSG00000128463	EMC4	chr15	+	7.15463e-05	0.00991453	0.128
ENSG00000149262	INTS4	chr11	-	7.18648e-05	0.00991453	0.101
ENSG00000175581	MRPL48	chr11	+	7.25834e-05	0.00991453	-0.334
ENSG00000117620	SLC35A3	chr1	+	7.27168e-05	0.00991453	-0.203
ENSG00000165533	TTC8	chr14	+	7.35091e-05	0.00995661	0.496
ENSG00000180902	D2HGDH	chr2	+	7.41987e-05	0.00998433	-0.397
ENSG00000198561	CTNND1	chr11	+	7.57722e-05	0.0100751	-0.148
ENSG00000090060	PAPOLA	chr14	+	7.58933e-05	0.0100751	-0.209
ENSG00000137145	DENND4C	chr9	+	7.63415e-05	0.0100751	-0.226
ENSG00000146067	FAM193B	chr5	-	8.08158e-05	0.0105977	0.169
ENSG00000108021	FAM208B	chr10	+	8.30207e-05	0.0108179	-0.232
ENSG00000010803	SCMH1	chr1	-	8.45579e-05	0.0109489	0.247
ENSG00000011523	CEP68	chr2	+	8.85085e-05	0.0113181	0.125
ENSG00000141644	MBD1	chr18	-	9.47874e-05	0.0120462	0.338
ENSG00000111247	RAD51AP1	chr12	+	9.70886e-05	0.012263	0.12
ENSG00000003756	RBM5	chr3	+	0.000103125	0.0128675	-0.222
ENSG00000218739	AC007390.5	chr2	+	0.000104971	0.0130039	-0.389
ENSG00000008130	NADK	chr1	-	0.000105481	0.0130039	0.252
ENSG00000090060	PAPOLA	chr14	+	0.000106276	0.0130239	-0.173
ENSG00000124588	NQO2	chr6	+	0.000112304	0.0134648	0.105
ENSG00000141644	MBD1	chr18	-	0.000112368	0.0134648	0.289
ENSG00000050426	LETMD1	chr12	+	0.000112982	0.0134648	-0.158
ENSG00000164118	CEP44	chr4	+	0.000113398	0.0134648	0.237
ENSG00000153551	CMTM7	chr3	+	0.000113798	0.0134648	-0.196
ENSG00000173914	RBM4B	chr11	-	0.000115299	0.0135645	0.324
ENSG00000148225	WDR31	chr9	-	0.000123036	0.0143924	-0.313
ENSG00000165689	SDCCAG3	chr9	-	0.000124269	0.0144545	0.285
ENSG00000130158	DOCK6	chr19	-	0.000131672	0.0151018	0.53
ENSG00000181381	DDX60L	chr4	-	0.000132059	0.0151018	-0.543
ENSG00000139546	TARBP2	chr12	+	0.000132768	0.0151018	0.25
ENSG00000081019	RSBN1	chr1	-	0.000136187	0.0154056	-0.204
ENSG00000001631	KRIT1	chr7	-	0.000139891	0.0156291	0.224
ENSG00000100577	GSTZ1	chr14	+	0.000140267	0.0156291	-0.22
ENSG00000249044	RP11-330M2.7	chr9	-	0.00014044	0.0156291	-0.658
ENSG00000050426	LETMD1	chr12	+	0.000148136	0.0163896	-0.139
ENSG00000185813	PCYT2	chr17	-	0.000149076	0.0163896	0.299
ENSG00000123405	NFE2	chr12	-	0.000149662	0.0163896	0.116
ENSG00000196730	DAPK1	chr9	+	0.000152069	0.0165651	-0.121
ENSG00000231312	AC007246.3	chr2	+	0.000158799	0.0172071	0.227
ENSG00000161813	LARP4	chr12	+	0.000159662	0.0172101	0.383
ENSG00000128463	EMC4	chr15	+	0.000161214	0.0172868	0.102
ENSG00000083520	DIS3	chr13	-	0.000164488	0.0175465	-0.3
ENSG00000005189	AC004381.6	chr16	+	0.000167301	0.0175844	-0.131
ENSG00000119929	CUTC	chr10	+	0.000167947	0.0175844	-0.174
ENSG00000263711	RP11-169F17.1	chr18	-	0.000168259	0.0175844	0.434
ENSG00000251369	ZNF550	chr19	-	0.000169177	0.017591	0.404
ENSG00000138002	IFT172	chr2	-	0.000171289	0.0177211	0.174
ENSG00000109756	RAPGEF2	chr4	+	0.000173683	0.0178432	-0.147
ENSG00000131389	SLC6A6	chr3	+	0.000174202	0.0178432	0.112
ENSG00000105483	CARD8	chr19	-	0.00017558	0.0178953	0.225
ENSG00000171456	ASXL1	chr20	+	0.000177247	0.0179762	0.667
ENSG00000140795	MYLK3	chr16	-	0.000181415	0.0181885	0.315
ENSG00000148225	WDR31	chr9	-	0.000182177	0.0181885	-0.262
ENSG00000183597	TANGO2	chr22	+	0.000182875	0.0181885	-0.288
ENSG00000123130	ACOT9	chrX	-	0.000184095	0.0182219	0.261
ENSG00000163644	PPM1K	chr4	-	0.000187631	0.018483	-0.512
ENSG00000106080	FKBP14	chr7	-	0.000191813	0.018805	0.136
ENSG00000083097	DOPEY1	chr6	+	0.000204019	0.0197053	0.315
ENSG00000105221	AKT2	chr19	-	0.00020432	0.0197053	0.476
ENSG00000138668	HNRNPD	chr4	-	0.000204372	0.0197053	-0.2
ENSG00000135164	DMTF1	chr7	+	0.000204825	0.0197053	-0.232
ENSG00000105699	LSR	chr19	+	0.000207171	0.0198383	0.222
ENSG00000205981	DNAJC19	chr3	-	0.00021378	0.0203764	-0.432
ENSG00000198270	TMEM116	chr12	-	0.000224315	0.0211844	-0.185
ENSG00000140988	RPS2	chr16	-	0.000228577	0.0214884	-0.379
ENSG00000126768	TIMM17B	chrX	-	0.000236579	0.0220393	0.109
ENSG00000140451	PIF1	chr15	-	0.000241651	0.0224104	-0.786
ENSG00000172244	C5orf34	chr5	-	0.000250545	0.0231311	-0.45
ENSG00000109756	RAPGEF2	chr4	+	0.000262205	0.0240995	0.394
ENSG00000233080	CTA-714B7.5	chr22	-	0.000267798	0.0244745	-0.423
ENSG00000110422	HIPK3	chr11	+	0.000268664	0.0244745	0.196
ENSG00000065613	SLK	chr10	+	0.000271643	0.0246369	-0.1
ENSG00000008130	NADK	chr1	-	0.000278247	0.0249532	0.127
ENSG00000132376	INPP5K	chr17	-	0.00027917	0.0249532	0.481
ENSG00000110713	NUP98	chr11	-	0.000279979	0.0249532	-0.134
ENSG00000136925	TSTD2	chr9	-	0.000288591	0.02561	-0.222
ENSG00000114098	ARMC8	chr3	+	0.000292272	0.0258253	-0.549
ENSG00000198700	IPO9	chr1	+	0.000301394	0.0265175	0.217
ENSG00000105341	ATP5SL	chr19	-	0.000311584	0.0272974	-0.172
ENSG00000169432	SCN9A	chr2	-	0.000323845	0.0281611	-0.203
ENSG00000196756	RP4-564F22.2	chr20	-	0.000324373	0.0281611	0.547
ENSG00000110931	CAMKK2	chr12	-	0.000326313	0.0281611	-0.257
ENSG00000168769	TET2	chr4	+	0.000326914	0.0281611	0.425
ENSG00000251369	ZNF550	chr19	-	0.000333634	0.0286202	0.386
ENSG00000242588	RP11-274B21.1	chr7	+	0.000351043	0.0299887	-0.548
ENSG00000157764	BRAF	chr7	-	0.000361849	0.0307189	-0.365
ENSG00000148950	IMMP1L	chr11	-	0.000362575	0.0307189	0.383
ENSG00000151657	KIN	chr10	-	0.000365585	0.0307707	0.171
ENSG00000145388	METTL14	chr4	+	0.000366175	0.0307707	-0.259
ENSG00000081154	PCNP	chr3	+	0.000381764	0.0319503	-0.315
ENSG00000183077	AFMID	chr17	+	0.000393479	0.0327974	-0.167
ENSG00000137075	RNF38	chr9	-	0.000400961	0.0331525	-0.417
ENSG00000136942	RPL35	chr9	-	0.000409439	0.0337182	0.328
ENSG00000135506	OS9	chr12	+	0.000411354	0.0337408	0.19
ENSG00000169682	SPNS1	chr16	+	0.000424005	0.0343487	0.279
ENSG00000178773	CPNE7	chr16	+	0.000426235	0.0343487	0.177
ENSG00000181163	NPM1	chr5	+	0.000427106	0.0343487	-0.113
ENSG00000059588	TARBP1	chr1	-	0.000430871	0.0343973	-0.224
ENSG00000148660	CAMK2G	chr10	-	0.000431052	0.0343973	0.303
ENSG00000148358	GPR107	chr9	+	0.000439789	0.0348526	0.622
ENSG00000151422	FER	chr5	+	0.000440143	0.0348526	0.325
ENSG00000184182	UBE2F	chr2	+	0.000441837	0.0348527	0.17
ENSG00000266173	STRADA	chr17	-	0.000450313	0.0353857	-0.438
ENSG00000134352	IL6ST	chr5	-	0.000466226	0.0363585	-0.261
ENSG00000125319	C17orf53	chr17	+	0.000468656	0.0364102	0.308
ENSG00000136237	RAPGEF5	chr7	-	0.000482347	0.0371931	0.143
ENSG00000169519	METTL15	chr11	+	0.000492531	0.037696	-0.152
ENSG00000222041	LINC00152	chr2	+	0.000500034	0.0381285	0.343
ENSG00000196914	ARHGEF12	chr11	+	0.000503975	0.0382872	0.16
ENSG00000135299	ANKRD6	chr6	+	0.000507299	0.038307	0.131
ENSG00000171055	FEZ2	chr2	-	0.000507957	0.038307	0.107
ENSG00000185019	UBOX5	chr20	-	0.000520557	0.0390649	0.394
ENSG00000163138	PACRGL	chr4	+	0.000521802	0.0390649	-0.284
ENSG00000101928	MOSPD1	chrX	-	0.000539501	0.0401417	0.378
ENSG00000171634	BPTF	chr17	+	0.000540084	0.0401417	-0.182
ENSG00000221978	CCNL2	chr1	-	0.00054502	0.0403628	0.147
ENSG00000181450	ZNF678	chr1	+	0.000556998	0.0411021	-0.4
ENSG00000161647	MPP3	chr17	-	0.000562781	0.0413805	0.403
ENSG00000115392	FANCL	chr2	-	0.000581798	0.0424754	-0.242
ENSG00000125826	RBCK1	chr20	+	0.000587116	0.0426329	-0.112
ENSG00000152942	RAD17	chr5	+	0.000588097	0.0426329	-0.144
ENSG00000132640	BTBD3	chr20	+	0.000590758	0.0426755	-0.292
ENSG00000241945	PWP2	chr21	+	0.00059283	0.0426755	0.137
ENSG00000177981	ASB8	chr12	-	0.000605047	0.0434032	-0.139
ENSG00000152061	RABGAP1L	chr1	+	0.0006118	0.0437352	0.122
ENSG00000132204	LINC00470	chr18	-	0.000614902	0.0438049	0.592
ENSG00000196476	C20orf96	chr20	-	0.000645834	0.0458498	-0.151
ENSG00000016864	GLT8D1	chr3	-	0.000655529	0.0463781	0.322
ENSG00000163138	PACRGL	chr4	+	0.00066202	0.0466499	-0.198
ENSG00000228315	GUSBP11	chr22	-	0.000666441	0.046669	0.573
ENSG00000175137	SH3BP5L	chr1	-	0.00067315	0.0466806	0.105
ENSG00000162521	RBBP4	chr1	+	0.000673181	0.0466806	-0.145
ENSG00000177565	TBL1XR1	chr3	-	0.000673409	0.0466806	-0.423
ENSG00000064607	SUGP2	chr19	-	0.000689003	0.0476013	-0.167
ENSG00000171634	BPTF	chr17	+	0.000691473	0.0476122	0.184
ENSG00000133812	SBF2	chr11	-	0.000697466	0.0478647	-0.505
ENSG00000148358	GPR107	chr9	+	0.000707517	0.0483932	-0.223
ENSG00000153157	SYCP2L	chr6	+	0.000716269	0.0484416	-0.155
ENSG00000055609	MLL3	chr7	-	0.000717637	0.0484416	-0.178
ENSG00000100099	HPS4	chr22	-	0.000726511	0.0488804	-0.667
ENSG00000031003	FAM13B	chr5	-	0.000733113	0.0490915	-0.387
ENSG00000143549	TPM3	chr1	-	0.000734418	0.0490915	-0.413
ENSG00000197275	RAD54B	chr8	-	0.00077732	0.0517748	0.308
ENSG00000185324	CDK10	chr16	+	0.000779589	0.0517748	0.326
ENSG00000143549	TPM3	chr1	-	0.000791264	0.0522133	-0.412
ENSG00000120798	NR2C1	chr12	-	0.000804354	0.0529075	-0.28
ENSG00000151276	MAGI1	chr3	-	0.000820488	0.0537968	-0.343
ENSG00000183597	TANGO2	chr22	+	0.000835678	0.0546189	-0.228
ENSG00000143164	DCAF6	chr1	+	0.00085377	0.0556247	0.111
ENSG00000151338	MIPOL1	chr14	+	0.000857853	0.055671	0.185
ENSG00000115677	HDLBP	chr2	-	0.000859888	0.055671	-0.375
ENSG00000114544	SLC41A3	chr3	-	0.000867654	0.0559977	-0.214
ENSG00000139624	CERS5	chr12	-	0.00088977	0.0570069	-0.206
ENSG00000122126	OCRL	chrX	+	0.000891598	0.0570069	0.107
ENSG00000171940	ZNF217	chr20	-	0.000898732	0.0572851	-0.2
ENSG00000119185	ITGB1BP1	chr2	-	0.000903507	0.0573439	0.334
ENSG00000156170	NDUFAF6	chr8	+	0.000911472	0.0573439	0.341
ENSG00000253729	PRKDC	chr8	-	0.000912489	0.0573439	-0.117
ENSG00000198270	TMEM116	chr12	-	0.000912681	0.0573439	-0.138
ENSG00000088298	EDEM2	chr20	-	0.000952734	0.0592595	0.217
ENSG00000148925	BTBD10	chr11	-	0.000962891	0.0597109	0.456
ENSG00000170627	GTSF1	chr12	-	0.000974546	0.0601315	-0.11
ENSG00000127603	MACF1	chr1	+	0.000975515	0.0601315	-0.101
ENSG00000157741	UBN2	chr7	+	0.00100405	0.0617053	0.453
ENSG00000105483	CARD8	chr19	-	0.00102405	0.0625615	0.161
ENSG00000109790	KLHL5	chr4	+	0.00103398	0.062981	0.444
ENSG00000129158	SERGEF	chr11	-	0.00104392	0.0633992	-0.247
ENSG00000161813	LARP4	chr12	+	0.00105172	0.0636845	-0.185
ENSG00000160953	MUM1	chr19	+	0.00105858	0.0638178	0.368
ENSG00000196792	STRN3	chr14	-	0.00106012	0.0638178	-0.248
ENSG00000144395	CCDC150	chr2	+	0.00108654	0.0652179	0.358
ENSG00000164124	TMEM144	chr4	+	0.0011115	0.0665058	0.567
ENSG00000188002	RP11-43F13.1	chr5	-	0.00111446	0.0665058	-0.207
ENSG00000047188	YTHDC2	chr5	+	0.00113453	0.0675081	0.213
ENSG00000151276	MAGI1	chr3	-	0.00114126	0.0677109	-0.326
ENSG00000134490	TMEM241	chr18	-	0.00114452	0.0677109	-0.286
ENSG00000124214	STAU1	chr20	-	0.00116407	0.0686701	0.513
ENSG00000204842	ATXN2	chr12	-	0.00117078	0.068789	0.257
ENSG00000143774	GUK1	chr1	+	0.00117277	0.068789	0.191
ENSG00000156931	VPS8	chr3	+	0.00118451	0.0692806	0.264
ENSG00000197816	CCDC180	chr9	+	0.00120412	0.0702277	0.35
ENSG00000114544	SLC41A3	chr3	-	0.00121927	0.0709105	-0.179
ENSG00000185485	SDHAP1	chr3	-	0.00125061	0.0723244	0.49
ENSG00000151353	TMEM18	chr2	-	0.00129643	0.0747643	0.277
ENSG00000134326	CMPK2	chr2	-	0.00130782	0.0750014	-0.111
ENSG00000143164	DCAF6	chr1	+	0.00134943	0.076746	0.366
ENSG00000103490	PYCARD	chr16	-	0.00135554	0.0768576	0.325
ENSG00000117616	C1orf63	chr1	-	0.00136125	0.0768576	0.149
ENSG00000144283	PKP4	chr2	+	0.00136441	0.0768576	-0.143
ENSG00000165028	NIPSNAP3B	chr9	+	0.00142466	0.0794873	-0.233
ENSG00000131375	CAPN7	chr3	+	0.00143434	0.0798115	-0.303
ENSG00000123933	MXD4	chr4	-	0.0014527	0.0806152	0.271
ENSG00000001631	KRIT1	chr7	-	0.00147425	0.0811712	0.109
ENSG00000186481	ANKRD20A5P	chr18	+	0.00147455	0.0811712	-0.379
ENSG00000125354	SEPT6	chrX	-	0.00148302	0.08142	-0.208
ENSG00000163684	RPP14	chr3	+	0.00150498	0.0821353	-0.285
ENSG00000185324	CDK10	chr16	+	0.00150899	0.0821353	0.531
ENSG00000072803	FBXW11	chr5	-	0.00151344	0.0821353	-0.194
ENSG00000148399	WDR85	chr9	-	0.001516	0.0821353	-0.244
ENSG00000111647	UHRF1BP1L	chr12	-	0.00153798	0.0831076	0.137
ENSG00000125826	RBCK1	chr20	+	0.00155013	0.0831712	-0.16
ENSG00000106723	SPIN1	chr9	+	0.00155043	0.0831712	-0.3
ENSG00000180178	AC018865.8	chr2	-	0.00155265	0.0831712	0.373
ENSG00000131374	TBC1D5	chr3	-	0.00155692	0.0831712	-0.337
ENSG00000080839	RBL1	chr20	-	0.00155936	0.0831712	-0.11
ENSG00000001629	ANKIB1	chr7	+	0.00156792	0.0834116	-0.141
ENSG00000114857	NKTR	chr3	+	0.00159318	0.0843528	0.502
ENSG00000081377	CDC14B	chr9	-	0.00160242	0.0843528	0.352
ENSG00000070718	AP3M2	chr8	+	0.00160439	0.0843528	0.193
ENSG00000129347	KRI1	chr19	-	0.00160824	0.0843528	-0.416
ENSG00000251022	THAP9-AS1	chr4	-	0.00161019	0.0843528	0.164
ENSG00000204054	RP11-492E3.1	chr9	+	0.00163805	0.0855945	0.276
ENSG00000089057	SLC23A2	chr20	-	0.00166698	0.0868855	0.237
ENSG00000020426	MNAT1	chr14	+	0.00171364	0.0887604	-0.155
ENSG00000167113	COQ4	chr9	+	0.00171561	0.0887604	0.148
ENSG00000088298	EDEM2	chr20	-	0.00171867	0.0887604	-0.166
ENSG00000140463	BBS4	chr15	+	0.0017202	0.0887604	-0.132
ENSG00000142856	ITGB3BP	chr1	-	0.00175499	0.090314	-0.135
ENSG00000116539	ASH1L	chr1	-	0.00175908	0.090314	0.309
ENSG00000114126	TFDP2	chr3	-	0.00178682	0.0915101	-0.211
ENSG00000114127	XRN1	chr3	-	0.00180511	0.0919892	0.169
ENSG00000067208	EVI5	chr1	-	0.00183013	0.0930339	-0.421
ENSG00000196074	SYCP2	chr20	-	0.00191361	0.0970377	0.206
ENSG00000183495	EP400	chr12	+	0.0019276	0.0975071	0.201
ENSG00000100099	HPS4	chr22	-	0.00196305	0.0989295	0.178
ENSG00000113300	CNOT6	chr5	+	0.00196533	0.0989295	-0.171
ENSG00000156239	N6AMT1	chr21	-	0.00197647	0.0990546	0.293
ENSG00000214022	REPIN1	chr7	+	0.00197744	0.0990546	-0.14
ENSG00000170949	ZNF160	chr19	-	0.00199001	0.0993539	-0.561
ENSG00000184154	LRTOMT	chr11	+	0.00199789	0.0993539	-0.182
ENSG00000122085	MTERFD2	chr2	-	0.00200969	0.0997001	-0.276
ENSG00000138592	USP8	chr15	+	0.00204449	0.101048	-0.31
ENSG00000160584	SIK3	chr11	-	0.00205458	0.101048	0.162
ENSG00000138468	SENP7	chr3	-	0.00205975	0.101048	-0.132
ENSG00000197912	SPG7	chr16	+	0.00206042	0.101048	0.131
ENSG00000169914	OTUD3	chr1	+	0.0020663	0.101048	0.189
ENSG00000124356	STAMBP	chr2	+	0.0021033	0.102371	-0.129
ENSG00000164576	SAP30L	chr5	+	0.00212546	0.103205	0.1
ENSG00000147854	UHRF2	chr9	+	0.00213158	0.103259	0.383
ENSG00000106009	BRAT1	chr7	-	0.00213675	0.103266	0.228
ENSG00000164649	CDCA7L	chr7	-	0.00216801	0.104287	-0.214
ENSG00000005175	RPAP3	chr12	-	0.00217793	0.10452	-0.242
ENSG00000164347	GFM2	chr5	-	0.00219207	0.104954	0.147
ENSG00000123219	CENPK	chr5	-	0.00220524	0.105112	0.226
ENSG00000154814	OXNAD1	chr3	+	0.00220557	0.105112	0.156
ENSG00000162599	NFIA	chr1	+	0.00223867	0.106443	-0.453
ENSG00000168769	TET2	chr4	+	0.0022727	0.107564	0.302
ENSG00000162994	CLHC1	chr2	-	0.00229925	0.108571	0.185
ENSG00000171604	CXXC5	chr5	+	0.00231568	0.109097	0.235
ENSG00000137807	KIF23	chr15	+	0.00233686	0.109843	0.24
ENSG00000234741	GAS5	chr1	-	0.00236373	0.110806	0.246
ENSG00000152556	PFKM	chr12	+	0.00236811	0.110806	-0.213
ENSG00000168003	SLC3A2	chr11	+	0.00240707	0.11192	0.296
ENSG00000162669	HFM1	chr1	-	0.00240822	0.11192	0.504
ENSG00000131381	ZFYVE20	chr3	-	0.00241956	0.112194	0.325
ENSG00000176974	SHMT1	chr17	-	0.00243283	0.112555	-0.275
ENSG00000156313	RPGR	chrX	-	0.00244039	0.112652	0.681
ENSG00000174365	SNHG11	chr20	+	0.00247431	0.113258	0.542
ENSG00000115568	ZNF142	chr2	-	0.00247551	0.113258	-0.322
ENSG00000130559	CAMSAP1	chr9	-	0.00249909	0.113932	0.135
ENSG00000168958	MFF	chr2	+	0.00250132	0.113932	0.213
ENSG00000243789	JMJD7	chr15	+	0.00251295	0.114209	0.448
ENSG00000198858	R3HDM4	chr19	-	0.00253413	0.11473	0.135
ENSG00000132485	ZRANB2	chr1	-	0.00253555	0.11473	-0.168
ENSG00000119950	MXI1	chr10	+	0.00255584	0.115394	-0.295
ENSG00000106070	GRB10	chr7	-	0.00256459	0.115536	-0.167
ENSG00000185305	ARL15	chr5	-	0.00260509	0.116817	-0.112
ENSG00000148950	IMMP1L	chr11	-	0.00261637	0.116817	-0.364
ENSG00000007392	LUC7L	chr16	-	0.00262051	0.116817	0.376
ENSG00000067221	STOML1	chr15	-	0.00264623	0.117668	-0.536
ENSG00000183943	PRKX	chrX	-	0.00266759	0.118363	0.188
ENSG00000153066	TXNDC11	chr16	-	0.00268851	0.118862	-0.239
ENSG00000163374	YY1AP1	chr1	-	0.00269038	0.118862	-0.224
ENSG00000115568	ZNF142	chr2	-	0.0027568	0.121276	-0.258
ENSG00000119787	ATL2	chr2	-	0.00276511	0.121382	0.182
ENSG00000163291	PAQR3	chr4	-	0.00280008	0.122395	0.133
ENSG00000090612	ZNF268	chr12	+	0.00281015	0.122575	-0.23
ENSG00000183826	BTBD9	chr6	-	0.00281901	0.122702	-0.322
ENSG00000165795	NDRG2	chr14	-	0.00282725	0.1228	0.54
ENSG00000110841	PPFIBP1	chr12	+	0.00285507	0.123488	-0.326
ENSG00000105700	KXD1	chr19	+	0.00290152	0.124972	0.109
ENSG00000163697	APBB2	chr4	-	0.00290894	0.125002	0.194
ENSG00000164649	CDCA7L	chr7	-	0.00291436	0.125002	-0.2
ENSG00000137601	NEK1	chr4	-	0.00293516	0.125632	-0.243
ENSG00000104723	TUSC3	chr8	+	0.00296164	0.126241	0.17
ENSG00000131236	CAP1	chr1	+	0.00299564	0.127163	0.119
ENSG00000176124	DLEU1	chr13	+	0.00301649	0.127785	-0.377
ENSG00000214022	REPIN1	chr7	+	0.00313288	0.131632	-0.182
ENSG00000110721	CHKA	chr11	-	0.00317558	0.13306	0.396
ENSG00000079277	MKNK1	chr1	-	0.00317979	0.13306	-0.258
ENSG00000173559	NABP1	chr2	+	0.00321122	0.133419	-0.228
ENSG00000126790	L3HYPDH	chr14	-	0.0032195	0.133419	-0.4
ENSG00000141255	SPATA22	chr17	-	0.00322059	0.133419	0.249
ENSG00000049883	PTCD2	chr5	+	0.00322131	0.133419	0.557
ENSG00000101745	ANKRD12	chr18	+	0.00323017	0.133419	-0.191
ENSG00000082258	CCNT2	chr2	+	0.00323902	0.133419	0.247
ENSG00000135250	SRPK2	chr7	-	0.00324022	0.133419	-0.139
ENSG00000163684	RPP14	chr3	+	0.0033103	0.136033	-0.228
ENSG00000112584	FAM120B	chr6	+	0.00335487	0.13759	-0.287
ENSG00000142856	ITGB3BP	chr1	-	0.00337328	0.13807	0.151
ENSG00000144741	SLC25A26	chr3	+	0.00339036	0.138494	0.113
ENSG00000079393	DUSP13	chr10	-	0.00341419	0.139191	0.193
ENSG00000166157	TPTE	chr21	-	0.00343555	0.139785	0.237
ENSG00000058804	TMEM48	chr1	-	0.00344982	0.140088	0.11
ENSG00000243147	MRPL33	chr2	+	0.00349943	0.141823	0.187
ENSG00000198860	TSEN15	chr1	+	0.00351058	0.141996	0.25
ENSG00000164808	KIAA0146	chr8	+	0.00355265	0.143238	-0.246
ENSG00000197912	SPG7	chr16	+	0.00355521	0.143238	0.131
ENSG00000114126	TFDP2	chr3	-	0.00356865	0.143499	-0.114
ENSG00000238243	OR2W3	chr1	+	0.00360013	0.144202	0.175
ENSG00000099219	ERMP1	chr9	-	0.00361924	0.144685	-0.148
ENSG00000198496	NBR2	chr17	+	0.00367136	0.146484	-0.304
ENSG00000230257	RP11-645N11.2	chr7	+	0.00372779	0.148448	-0.451
ENSG00000106853	PTGR1	chr9	-	0.0037964	0.150598	-0.11
ENSG00000115839	RAB3GAP1	chr2	+	0.00393084	0.154533	0.297
ENSG00000135299	ANKRD6	chr6	+	0.00398452	0.155665	-0.254
ENSG00000228315	GUSBP11	chr22	-	0.00398864	0.155665	-0.153
ENSG00000068120	COASY	chr17	+	0.00399798	0.155665	0.209
ENSG00000115827	DCAF17	chr2	+	0.00399975	0.155665	0.13
ENSG00000166912	MTMR10	chr15	-	0.00401074	0.155799	0.543
ENSG00000116161	CACYBP	chr1	+	0.00403574	0.156474	0.289
ENSG00000100578	KIAA0586	chr14	+	0.0040982	0.158597	-0.125
ENSG00000101639	CEP192	chr18	+	0.00417413	0.160775	0.103
ENSG00000120616	EPC1	chr10	-	0.00418427	0.160775	-0.166
ENSG00000129197	RPAIN	chr17	+	0.00419079	0.160775	0.197
ENSG00000163644	PPM1K	chr4	-	0.00419353	0.160775	-0.276
ENSG00000156162	DPY19L4	chr8	+	0.00420893	0.161066	-0.228
ENSG00000130731	C16orf13	chr16	-	0.00424331	0.16208	0.276
ENSG00000135503	ACVR1B	chr12	+	0.00427274	0.162386	-0.256
ENSG00000109381	ELF2	chr4	-	0.00427441	0.162386	-0.132
ENSG00000188033	ZNF490	chr19	-	0.00427499	0.162386	-0.325
ENSG00000088305	DNMT3B	chr20	+	0.00431779	0.163598	-0.293
ENSG00000140400	MAN2C1	chr15	-	0.00432278	0.163598	-0.183
ENSG00000132763	MMACHC	chr1	+	0.00433202	0.163647	-0.209
ENSG00000000457	SCYL3	chr1	-	0.00435327	0.163745	0.504
ENSG00000244687	UBE2V1	chr20	-	0.00437556	0.164062	-0.102
ENSG00000184281	TSSC4	chr11	+	0.00438286	0.164062	-0.226
ENSG00000165480	SKA3	chr13	-	0.00441417	0.164934	-0.125
ENSG00000056050	C4orf27	chr4	-	0.00444533	0.165798	0.14
ENSG00000173715	C11orf80	chr11	+	0.00447957	0.166773	-0.337
ENSG00000228315	GUSBP11	chr22	-	0.00450128	0.166985	-0.152
ENSG00000104047	DTWD1	chr15	+	0.00451987	0.167065	-0.137
ENSG00000050426	LETMD1	chr12	+	0.00454734	0.167479	-0.167
ENSG00000134982	APC	chr5	+	0.00457325	0.167833	-0.276
ENSG00000050426	LETMD1	chr12	+	0.00472765	0.17227	-0.13
ENSG00000129003	VPS13C	chr15	-	0.00479939	0.174472	-0.124
ENSG00000174748	RPL15	chr3	+	0.00480935	0.174472	-0.274
ENSG00000198911	SREBF2	chr22	+	0.00481349	0.174472	0.114
ENSG00000141255	SPATA22	chr17	-	0.00482384	0.174483	0.159
ENSG00000132199	ENOSF1	chr18	-	0.00483717	0.174483	-0.104
ENSG00000138640	FAM13A	chr4	-	0.00483923	0.174483	-0.151
ENSG00000133943	C14orf159	chr14	+	0.00495877	0.17817	0.333
ENSG00000165219	GAPVD1	chr9	+	0.00511909	0.182307	-0.279
ENSG00000245534	RP11-219B17.1	chr15	+	0.0051259	0.182307	-0.388
ENSG00000166333	ILK	chr11	+	0.00515149	0.182307	0.421
ENSG00000074054	CLASP1	chr2	-	0.00515592	0.182307	-0.301
ENSG00000242715	CCDC169	chr13	-	0.00516248	0.182307	0.389
ENSG00000108599	AKAP10	chr17	-	0.0051724	0.182345	-0.194
ENSG00000269293	RP1-265C24.9	chr6	-	0.00518751	0.18239	-0.242
ENSG00000135317	SNX14	chr6	-	0.00519767	0.18239	0.499
ENSG00000141068	KSR1	chr17	+	0.00520025	0.18239	-0.418
ENSG00000113391	FAM172A	chr5	-	0.005352	0.186758	-0.111
ENSG00000258038	CTD-2384A14.1	chr14	+	0.00547902	0.19023	0.272
ENSG00000112031	MTRF1L	chr6	-	0.00548451	0.19023	-0.204
ENSG00000121578	B4GALT4	chr3	-	0.00548847	0.19023	0.197
ENSG00000198231	DDX42	chr17	+	0.00550866	0.190446	0.131
ENSG00000110079	MS4A4A	chr11	+	0.00551321	0.190446	-0.14
ENSG00000157823	AP3S2	chr15	-	0.00557044	0.191753	0.126
ENSG00000060971	ACAA1	chr3	-	0.0056154	0.192363	0.627
ENSG00000166377	ATP9B	chr18	+	0.00563828	0.192826	-0.129
ENSG00000149150	SLC43A1	chr11	-	0.0056616	0.193302	0.416
ENSG00000172766	NAA16	chr13	+	0.00567418	0.193411	-0.171
ENSG00000126746	ZNF384	chr12	-	0.00573657	0.195214	0.155
ENSG00000151292	CSNK1G3	chr5	+	0.0057944	0.196532	0.106
ENSG00000115677	HDLBP	chr2	-	0.0058085	0.196687	-0.214
ENSG00000140479	PCSK6	chr15	-	0.0058196	0.196739	-0.344
ENSG00000124532	MRS2	chr6	+	0.00586233	0.197858	0.319
ENSG00000230189	GS1-124K5.2	chr7	-	0.00590668	0.198704	0.284
ENSG00000079393	DUSP13	chr10	-	0.00593283	0.199258	0.262
ENSG00000112851	ERBB2IP	chr5	+	0.0059427	0.199264	0.151
ENSG00000163281	GNPDA2	chr4	-	0.00604078	0.201694	-0.254
ENSG00000168214	RBPJ	chr4	+	0.00604454	0.201694	-0.172
ENSG00000115677	HDLBP	chr2	-	0.00607427	0.201996	-0.211
ENSG00000163738	MTHFD2L	chr4	+	0.0060847	0.201996	-0.306
ENSG00000107929	LARP4B	chr10	-	0.00613864	0.202984	0.148
ENSG00000100376	FAM118A	chr22	+	0.00614236	0.202984	0.1
ENSG00000070371	CLTCL1	chr22	-	0.00622686	0.205447	0.241
ENSG00000102575	ACP5	chr19	-	0.00628469	0.206599	0.178
ENSG00000138468	SENP7	chr3	-	0.00629497	0.206599	-0.132
ENSG00000171634	BPTF	chr17	+	0.00630194	0.206599	0.146
ENSG00000228315	GUSBP11	chr22	-	0.00642514	0.20997	0.309
ENSG00000078967	UBE2D4	chr7	+	0.00647038	0.211113	0.438
ENSG00000068120	COASY	chr17	+	0.00657352	0.213666	0.181
ENSG00000198130	HIBCH	chr2	-	0.00657976	0.213666	-0.129
ENSG00000099326	MZF1	chr19	-	0.00659983	0.21398	-0.277
ENSG00000130921	C12orf65	chr12	+	0.00666101	0.215569	0.308
ENSG00000101003	GINS1	chr20	+	0.00666989	0.215569	0.195
ENSG00000112031	MTRF1L	chr6	-	0.00668025	0.215569	-0.165
ENSG00000115677	HDLBP	chr2	-	0.00677051	0.217799	-0.205
ENSG00000168393	DTYMK	chr2	-	0.00679954	0.218328	-0.128
ENSG00000125354	SEPT6	chrX	-	0.00680816	0.218328	-0.25
ENSG00000137210	TMEM14B	chr6	+	0.00686069	0.219213	-0.421
ENSG00000135913	USP37	chr2	-	0.0068671	0.219213	0.254
ENSG00000187109	NAP1L1	chr12	-	0.00686772	0.219213	0.381
ENSG00000269893	SNHG8	chr4	+	0.00692504	0.22036	0.1
ENSG00000083520	DIS3	chr13	-	0.00717631	0.226257	0.227
ENSG00000204842	ATXN2	chr12	-	0.00723966	0.22721	0.346
ENSG00000135837	CEP350	chr1	+	0.00726415	0.227632	-0.123
ENSG00000196693	ZNF33B	chr10	-	0.00731143	0.22868	-0.12
ENSG00000075711	DLG1	chr3	-	0.00731981	0.22868	-0.175
ENSG00000223756	TSSC2	chr11	+	0.00737159	0.229601	0.215
ENSG00000198690	FAN1	chr15	+	0.00739459	0.229969	-0.103
ENSG00000177565	TBL1XR1	chr3	-	0.00744304	0.230779	-0.127
ENSG00000140105	WARS	chr14	-	0.00766654	0.236995	-0.313
ENSG00000079393	DUSP13	chr10	-	0.00772273	0.238374	0.208
ENSG00000140474	ULK3	chr15	-	0.00779105	0.239764	-0.42
ENSG00000075413	MARK3	chr14	+	0.00785377	0.240974	-0.122
ENSG00000215908	CROCCP2	chr1	-	0.00792317	0.242741	0.176
ENSG00000154114	TBCEL	chr11	+	0.00797715	0.243309	-0.269
ENSG00000104320	NBN	chr8	-	0.00800756	0.243875	-0.128
ENSG00000106460	TMEM106B	chr7	+	0.00802496	0.244044	0.12
ENSG00000101247	NDUFAF5	chr20	+	0.00808309	0.245088	0.19
ENSG00000115526	CHST10	chr2	-	0.00822159	0.248191	-0.181
ENSG00000166435	XRRA1	chr11	-	0.00827631	0.249259	-0.22
ENSG00000162910	MRPL55	chr1	-	0.00837143	0.25124	0.17
ENSG00000150938	CRIM1	chr2	+	0.00849492	0.254576	0.113
ENSG00000188219	POTEE	chr2	+	0.00867984	0.258986	-0.255
ENSG00000105699	LSR	chr19	+	0.00872345	0.259911	-0.148
ENSG00000121067	SPOP	chr17	-	0.00873626	0.259916	-0.137
ENSG00000066651	TRMT11	chr6	+	0.00876768	0.260279	-0.18
ENSG00000114796	KLHL24	chr3	+	0.00877373	0.260279	-0.437
ENSG00000067221	STOML1	chr15	-	0.00880943	0.260962	-0.443
ENSG00000117859	OSBPL9	chr1	+	0.00891337	0.262906	-0.244
ENSG00000088298	EDEM2	chr20	-	0.00896238	0.263596	-0.159
ENSG00000114098	ARMC8	chr3	+	0.0091113	0.266563	-0.189
ENSG00000184007	PTP4A2	chr1	-	0.00911505	0.266563	-0.174
ENSG00000125386	FAM193A	chr4	+	0.00914951	0.267192	-0.194
ENSG00000154114	TBCEL	chr11	+	0.00917701	0.26736	-0.33
ENSG00000148498	PARD3	chr10	-	0.00927864	0.269434	-0.119
ENSG00000125962	ARMCX5	chrX	+	0.00934423	0.270734	0.114
ENSG00000061936	SFSWAP	chr12	+	0.00935207	0.270734	0.131
ENSG00000143382	ADAMTSL4	chr1	+	0.00944435	0.272212	-0.171
ENSG00000070526	ST6GALNAC1	chr17	-	0.00945364	0.272212	-0.125
ENSG00000162039	MEIOB	chr16	-	0.00957794	0.274257	-0.155
ENSG00000133193	FAM104A	chr17	-	0.00963598	0.275535	-0.245
ENSG00000132155	RAF1	chr3	-	0.00974841	0.278187	0.113
ENSG00000198626	RYR2	chr1	+	0.00975572	0.278187	-0.521
ENSG00000138449	SLC40A1	chr2	-	0.00980556	0.279221	0.363
ENSG00000066117	SMARCD1	chr12	+	0.00984145	0.279552	0.138
ENSG00000156990	RPUSD3	chr3	-	0.00984433	0.279552	0.197
ENSG00000166888	STAT6	chr12	-	0.00992617	0.281362	0.191
ENSG00000109083	IFT20	chr17	-	0.00993541	0.281362	0.306
ENSG00000023330	ALAS1	chr3	+	0.0100468	0.284127	0.508
ENSG00000185811	IKZF1	chr7	+	0.0100882	0.284906	0.195
ENSG00000128915	NARG2	chr15	-	0.0101069	0.285042	0.212
ENSG00000101972	STAG2	chrX	+	0.0101592	0.285134	0.147
ENSG00000100226	GTPBP1	chr22	+	0.0101613	0.285134	-0.467
ENSG00000011454	RABGAP1	chr9	+	0.0101655	0.285134	-0.181
ENSG00000164211	STARD4	chr5	-	0.0103052	0.287845	0.218
ENSG00000157869	RAB28	chr4	-	0.0103712	0.288154	0.504
ENSG00000140262	TCF12	chr15	+	0.0103909	0.288314	-0.1
ENSG00000178234	GALNT11	chr7	+	0.0104795	0.29038	-0.21
ENSG00000100207	TCF20	chr22	-	0.0105118	0.290883	-0.186
ENSG00000185485	SDHAP1	chr3	-	0.0107316	0.295773	0.15
ENSG00000100890	KIAA0391	chr14	+	0.0107659	0.296032	-0.201
ENSG00000196776	CD47	chr3	-	0.010922	0.299494	-0.154
ENSG00000126767	ELK1	chrX	-	0.0109248	0.299494	0.257
ENSG00000166797	FAM96A	chr15	-	0.0110443	0.301503	-0.149
ENSG00000197147	LRRC8B	chr1	+	0.011098	0.301637	-0.278
ENSG00000265681	RPL17	chr18	-	0.0111919	0.301991	0.119
ENSG00000105856	HBP1	chr7	+	0.0112539	0.303265	0.367
ENSG00000150403	TMCO3	chr13	+	0.0113194	0.304632	-0.144
ENSG00000166747	AP1G1	chr16	-	0.0114902	0.308021	-0.492
ENSG00000134324	LPIN1	chr2	+	0.0115496	0.308464	0.353
ENSG00000117691	NENF	chr1	+	0.0115502	0.308464	0.165
ENSG00000072803	FBXW11	chr5	-	0.0115517	0.308464	0.254
ENSG00000204120	GIGYF2	chr2	+	0.0116142	0.309331	-0.132
ENSG00000174483	BBS1	chr11	+	0.0116844	0.310143	0.332
ENSG00000070010	UFD1L	chr22	-	0.0116899	0.310143	-0.131
ENSG00000125257	ABCC4	chr13	-	0.0117365	0.310843	0.107
ENSG00000143727	ACP1	chr2	+	0.011751	0.310843	-0.104
ENSG00000089159	PXN	chr12	-	0.0118857	0.313721	-0.419
ENSG00000127507	EMR2	chr19	-	0.0120031	0.315205	0.6
ENSG00000092841	MYL6	chr12	+	0.0121564	0.318013	0.433
ENSG00000118495	PLAGL1	chr6	-	0.0122628	0.320389	0.266
ENSG00000128915	NARG2	chr15	-	0.0123282	0.321688	0.226
ENSG00000125447	GGA3	chr17	-	0.0123512	0.321729	-0.262
ENSG00000138380	ALS2CR8	chr2	+	0.0123922	0.321729	-0.228
ENSG00000023191	RNH1	chr11	-	0.012426	0.322199	0.143
ENSG00000213468	RP11-453F18__B.1	chrX	-	0.0126025	0.326067	-0.21
ENSG00000166435	XRRA1	chr11	-	0.0126068	0.326067	0.381
ENSG00000154710	RABGEF1	chr7	+	0.0126819	0.327597	0.519
ENSG00000121644	DESI2	chr1	+	0.0127077	0.327853	-0.128
ENSG00000151445	VIPAS39	chr14	-	0.0127294	0.328002	-0.225
ENSG00000159147	DONSON	chr21	-	0.0128488	0.330665	-0.118
ENSG00000135148	TRAFD1	chr12	+	0.0129095	0.331811	-0.103
ENSG00000125846	ZNF133	chr20	+	0.0130176	0.333755	0.41
ENSG00000115504	EHBP1	chr2	+	0.0130482	0.333814	-0.138
ENSG00000065978	YBX1	chr1	+	0.0130703	0.333814	0.289
ENSG00000107371	EXOSC3	chr9	-	0.0131346	0.334582	0.1
ENSG00000109762	SNX25	chr4	+	0.0131807	0.334582	0.194
ENSG00000267243	AC005307.3	chr19	-	0.0131915	0.334582	0.409
ENSG00000102858	MGRN1	chr16	+	0.0132115	0.334582	0.316
ENSG00000032742	IFT88	chr13	+	0.0132793	0.335864	0.181
ENSG00000081026	MAGI3	chr1	+	0.0133268	0.336287	0.238
ENSG00000156931	VPS8	chr3	+	0.0133396	0.336287	-0.337
ENSG00000197563	PIGN	chr18	-	0.0133815	0.336437	0.278
ENSG00000105221	AKT2	chr19	-	0.0133955	0.336437	0.177
ENSG00000196295	AC005154.6	chr7	-	0.0134	0.336437	0.301
ENSG00000168661	ZNF30	chr19	+	0.0134279	0.336727	0.215
ENSG00000170949	ZNF160	chr19	-	0.0134495	0.33686	-0.51
ENSG00000156162	DPY19L4	chr8	+	0.0135004	0.337295	-0.122
ENSG00000109685	WHSC1	chr4	+	0.0135006	0.337295	0.115
ENSG00000164733	CTSB	chr8	-	0.0135161	0.337295	0.154
ENSG00000183765	CHEK2	chr22	-	0.0136645	0.340176	0.129
ENSG00000087995	METTL2A	chr17	+	0.0137487	0.341517	0.102
ENSG00000010270	STARD3NL	chr7	+	0.0137516	0.341517	0.155
ENSG00000258399	MEG8	chr14	+	0.0137989	0.341868	-0.148
ENSG00000050426	LETMD1	chr12	+	0.0138918	0.342931	-0.181
ENSG00000178163	ZNF518B	chr4	-	0.0140596	0.346243	0.144
ENSG00000143252	SDHC	chr1	+	0.014117	0.347241	-0.229
ENSG00000137871	ZNF280D	chr15	-	0.0141474	0.347575	-0.175
ENSG00000162086	ZNF75A	chr16	+	0.0142218	0.348688	-0.173
ENSG00000129158	SERGEF	chr11	-	0.0142634	0.348688	-0.651
ENSG00000143252	SDHC	chr1	+	0.0142798	0.348688	-0.228
ENSG00000103064	SLC7A6	chr16	+	0.0143416	0.349427	-0.158
ENSG00000111450	STX2	chr12	-	0.0145599	0.35349	-0.177
ENSG00000011451	WIZ	chr19	-	0.0147247	0.356231	0.299
ENSG00000136699	SMPD4	chr2	-	0.0147472	0.356355	-0.126
ENSG00000132424	PNISR	chr6	-	0.014825	0.357717	-0.168
ENSG00000176155	CCDC57	chr17	-	0.0149331	0.359465	0.17
ENSG00000036054	TBC1D23	chr3	+	0.0150245	0.360294	-0.102
ENSG00000138443	ABI2	chr2	+	0.01511	0.360414	-0.171
ENSG00000123106	CCDC91	chr12	+	0.0151317	0.360414	-0.162
ENSG00000005801	ZNF195	chr11	-	0.0151853	0.360468	-0.148
ENSG00000140464	PML	chr15	+	0.01521	0.360468	-0.186
ENSG00000213983	AP1G2	chr14	-	0.0153441	0.362693	0.503
ENSG00000140367	UBE2Q2	chr15	+	0.0154305	0.364316	-0.166
ENSG00000078674	PCM1	chr8	+	0.0155456	0.366613	-0.126
ENSG00000165997	ARL5B	chr10	+	0.0155803	0.36701	-0.11
ENSG00000035681	NSMAF	chr8	-	0.0158503	0.372518	0.103
ENSG00000059378	PARP12	chr7	-	0.0158901	0.372957	0.169
ENSG00000125319	C17orf53	chr17	+	0.0159052	0.372957	-0.359
ENSG00000162736	NCSTN	chr1	+	0.0160849	0.376315	0.107
ENSG00000133627	ACTR3B	chr7	+	0.016164	0.377735	0.219
ENSG00000067208	EVI5	chr1	-	0.0162125	0.378414	0.285
ENSG00000133103	COG6	chr13	+	0.0162298	0.378414	0.182
ENSG00000101452	DHX35	chr20	+	0.0164412	0.382477	0.275
ENSG00000251209	RP11-82I10.1	chr15	-	0.0165362	0.384251	-0.247
ENSG00000156642	NPTN	chr15	-	0.0168334	0.388629	0.401
ENSG00000119397	CNTRL	chr9	+	0.0168378	0.388629	0.331
ENSG00000172366	FAM195A	chr16	+	0.0168571	0.388638	0.408
ENSG00000173226	IQCB1	chr3	-	0.016927	0.389218	-0.118
ENSG00000108021	FAM208B	chr10	+	0.0171364	0.392442	-0.134
ENSG00000177565	TBL1XR1	chr3	-	0.0171944	0.39302	0.313
ENSG00000009413	REV3L	chr6	-	0.017203	0.39302	0.34
ENSG00000137817	PARP6	chr15	-	0.0172322	0.39302	0.269
ENSG00000119185	ITGB1BP1	chr2	-	0.0172381	0.39302	0.189
ENSG00000180182	MED14	chrX	-	0.0173099	0.394222	0.388
ENSG00000111371	SLC38A1	chr12	-	0.0175845	0.399592	-0.28
ENSG00000100038	TOP3B	chr22	-	0.0179194	0.405858	0.147
ENSG00000130731	C16orf13	chr16	-	0.0179542	0.406198	0.31
ENSG00000087299	L2HGDH	chr14	-	0.0180252	0.407264	-0.14
ENSG00000172889	EGFL7	chr9	+	0.018089	0.407556	-0.198
ENSG00000155508	CNOT8	chr5	+	0.0181445	0.40826	-0.184
ENSG00000145425	RPS3A	chr4	+	0.018235	0.409664	0.212
ENSG00000148773	MKI67	chr10	-	0.0182466	0.409664	-0.217
ENSG00000161800	RACGAP1	chr12	-	0.0182929	0.409862	0.226
ENSG00000168758	SEMA4C	chr2	-	0.0184406	0.411328	-0.245
ENSG00000101152	DNAJC5	chr20	+	0.0187069	0.416365	0.4
ENSG00000118260	CREB1	chr2	+	0.0187896	0.417304	-0.114
ENSG00000137817	PARP6	chr15	-	0.018831	0.417773	0.242
ENSG00000155542	SETD9	chr5	+	0.0190881	0.42302	-0.107
ENSG00000088298	EDEM2	chr20	-	0.019208	0.42486	-0.131
ENSG00000085382	HACE1	chr6	-	0.0192124	0.42486	0.455
ENSG00000148153	INIP	chr9	-	0.0192821	0.425944	-0.353
ENSG00000198556	ZNF789	chr7	+	0.0193238	0.426407	0.413
ENSG00000100335	SMCR7L	chr22	+	0.0193862	0.427305	0.139
ENSG00000253301	RP11-513O17.2	chr8	+	0.0194103	0.427305	0.285
ENSG00000148399	WDR85	chr9	-	0.0194652	0.427326	0.432
ENSG00000075826	SEC31B	chr10	-	0.0194692	0.427326	-0.373
ENSG00000235109	ZSCAN31	chr6	-	0.0195207	0.428	0.298
ENSG00000198626	RYR2	chr1	+	0.0196594	0.430583	-0.208
ENSG00000116212	LRRC42	chr1	+	0.0197139	0.431317	-0.331
ENSG00000099991	CABIN1	chr22	+	0.0198045	0.43238	-0.154
ENSG00000106948	AKNA	chr9	-	0.0198501	0.43278	0.158
ENSG00000165506	DNAAF2	chr14	-	0.0198651	0.43278	0.255
ENSG00000139531	SUOX	chr12	+	0.0198858	0.43278	-0.132
ENSG00000010803	SCMH1	chr1	-	0.0199724	0.434206	-0.159
ENSG00000247137	RP11-727A23.5	chr11	-	0.0200128	0.434624	-0.349
ENSG00000143374	TARS2	chr1	+	0.0200825	0.435221	-0.163
ENSG00000106404	CLDN15	chr7	-	0.0201617	0.436477	-0.166
ENSG00000173480	ZNF417	chr19	-	0.0202	0.436846	0.594
ENSG00000172943	PHF8	chrX	-	0.0202511	0.437078	0.131
ENSG00000029534	ANK1	chr8	-	0.0202532	0.437078	0.515
ENSG00000103194	USP10	chr16	+	0.0202882	0.437292	-0.103
ENSG00000185485	SDHAP1	chr3	-	0.0203056	0.437292	0.121
ENSG00000112851	ERBB2IP	chr5	+	0.02039	0.438652	0.153
ENSG00000167632	TRAPPC9	chr8	-	0.0204399	0.439267	0.375
ENSG00000112739	PRPF4B	chr6	+	0.0205318	0.440321	0.1
ENSG00000141552	ANAPC11	chr17	+	0.020627	0.441444	-0.178
ENSG00000010803	SCMH1	chr1	-	0.0207132	0.442828	-0.166
ENSG00000107929	LARP4B	chr10	-	0.0209328	0.445177	0.152
ENSG00000186001	LRCH3	chr3	+	0.0209684	0.445177	-0.358
ENSG00000159658	EFCAB14	chr1	-	0.0210589	0.446104	-0.168
ENSG00000131389	SLC6A6	chr3	+	0.0212113	0.448816	0.208
ENSG00000151576	QTRTD1	chr3	+	0.0212636	0.44946	0.366
ENSG00000129187	DCTD	chr4	-	0.0213373	0.450378	-0.177
ENSG00000102287	GABRE	chrX	-	0.0214064	0.451089	0.416
ENSG00000235109	ZSCAN31	chr6	-	0.0214384	0.451303	0.29
ENSG00000048707	VPS13D	chr1	+	0.0214893	0.451912	-0.103
ENSG00000158850	B4GALT3	chr1	-	0.0215807	0.452753	0.1
ENSG00000132600	PRMT7	chr16	+	0.021727	0.453666	0.147
ENSG00000088298	EDEM2	chr20	-	0.0222533	0.462343	-0.102
ENSG00000169241	SLC50A1	chr1	+	0.0222548	0.462343	0.105
ENSG00000113161	HMGCR	chr5	+	0.022489	0.465788	0.114
ENSG00000104164	BLOC1S6	chr15	+	0.0226392	0.467967	-0.112
ENSG00000248491	RP11-125O18.1	chr4	-	0.0227797	0.469431	0.3
ENSG00000241685	ARPC1A	chr7	+	0.0231969	0.475675	-0.46
ENSG00000160404	TOR2A	chr9	-	0.0232835	0.476976	0.291
ENSG00000163257	DCAF16	chr4	-	0.0233177	0.477202	-0.117
ENSG00000147324	MFHAS1	chr8	-	0.0233485	0.477358	0.333
ENSG00000205464	ATP6AP1L	chr5	+	0.0234335	0.478621	0.208
ENSG00000160055	TMEM234	chr1	-	0.0236338	0.481279	0.154
ENSG00000171456	ASXL1	chr20	+	0.0238295	0.483678	-0.212
ENSG00000124193	SRSF6	chr20	+	0.0238691	0.483678	0.196
ENSG00000049323	LTBP1	chr2	+	0.0239569	0.484634	-0.313
ENSG00000170946	DNAJC24	chr11	+	0.0240667	0.486247	0.101
ENSG00000073060	SCARB1	chr12	-	0.0242067	0.488595	0.15
ENSG00000134744	ZCCHC11	chr1	-	0.0242432	0.488853	0.107
ENSG00000110274	CEP164	chr11	+	0.0243045	0.48927	0.349
ENSG00000132341	RAN	chr12	+	0.0243135	0.48927	-0.125
ENSG00000148950	IMMP1L	chr11	-	0.0243955	0.48927	0.244
ENSG00000147465	STAR	chr8	-	0.0244441	0.489548	0.128
ENSG00000104365	IKBKB	chr8	+	0.0249205	0.498207	-0.317
ENSG00000113810	SMC4	chr3	+	0.0249909	0.498559	0.112
ENSG00000135164	DMTF1	chr7	+	0.0252036	0.502315	-0.216
ENSG00000100526	CDKN3	chr14	+	0.0253448	0.50453	0.255
ENSG00000171988	JMJD1C	chr10	-	0.0253637	0.50453	-0.178
ENSG00000168393	DTYMK	chr2	-	0.0254701	0.505182	-0.255
ENSG00000113240	CLK4	chr5	-	0.0255279	0.505841	-0.287
ENSG00000119004	CYP20A1	chr2	+	0.025621	0.507197	0.417
ENSG00000110075	PPP6R3	chr11	+	0.0256877	0.508028	-0.224
ENSG00000134490	TMEM241	chr18	-	0.0258363	0.509707	0.385
ENSG00000180257	ZNF816	chr19	-	0.0258468	0.509707	0.4
ENSG00000136122	BORA	chr13	+	0.0259712	0.511193	-0.144
ENSG00000124588	NQO2	chr6	+	0.0259967	0.511193	-0.149
ENSG00000169241	SLC50A1	chr1	+	0.0260607	0.511476	0.127
ENSG00000101972	STAG2	chrX	+	0.0263086	0.513544	0.259
ENSG00000106603	COA1	chr7	-	0.0263157	0.513544	0.152
ENSG00000051180	RAD51	chr15	+	0.0263895	0.514496	-0.142
ENSG00000171466	ZNF562	chr19	-	0.0264914	0.515796	-0.141
ENSG00000148660	CAMK2G	chr10	-	0.0265063	0.515796	-0.498
ENSG00000048052	HDAC9	chr7	+	0.0265999	0.517128	0.187
ENSG00000171634	BPTF	chr17	+	0.0269891	0.523212	0.144
ENSG00000117625	RCOR3	chr1	+	0.0271404	0.523898	-0.105
ENSG00000106460	TMEM106B	chr7	+	0.0271805	0.523898	0.103
ENSG00000111237	VPS29	chr12	-	0.0271937	0.523898	0.103
ENSG00000136521	NDUFB5	chr3	+	0.0272189	0.523898	0.145
ENSG00000144395	CCDC150	chr2	+	0.027228	0.523898	0.162
ENSG00000076685	NT5C2	chr10	-	0.0272628	0.524077	-0.117
ENSG00000178773	CPNE7	chr16	+	0.0273434	0.52504	0.189
ENSG00000114779	ABHD14B	chr3	-	0.0273639	0.52504	-0.233
ENSG00000138795	LEF1	chr4	-	0.0278389	0.531482	0.282
ENSG00000177058	SLC38A9	chr5	-	0.0278545	0.531482	-0.204
ENSG00000253352	TUG1	chr22	+	0.0280572	0.533176	0.122
ENSG00000156735	BAG4	chr8	+	0.0285326	0.539421	0.122
ENSG00000117691	NENF	chr1	+	0.0286065	0.540322	0.12
ENSG00000183077	AFMID	chr17	+	0.0288001	0.542983	0.176
ENSG00000054277	OPN3	chr1	-	0.028896	0.543882	0.217
ENSG00000149923	PPP4C	chr16	+	0.0289007	0.543882	0.119
ENSG00000157570	TSPAN18	chr11	+	0.0290036	0.54532	0.256
ENSG00000130731	C16orf13	chr16	-	0.0290797	0.545962	0.186
ENSG00000168421	RHOH	chr4	+	0.0290908	0.545962	-0.175
ENSG00000068745	IP6K2	chr3	-	0.0292168	0.547829	-0.133
ENSG00000143393	PI4KB	chr1	-	0.0292438	0.547835	-0.337
ENSG00000187790	FANCM	chr14	+	0.0293563	0.548944	0.229
ENSG00000182621	PLCB1	chr20	+	0.0295885	0.551783	-0.298
ENSG00000111653	ING4	chr12	-	0.0297592	0.553694	0.112
ENSG00000198000	NOL8	chr9	-	0.0299655	0.555552	0.11
ENSG00000164038	SLC9B2	chr4	-	0.0300894	0.557086	-0.112
ENSG00000196459	TRAPPC2	chrX	-	0.0312103	0.572179	-0.15
ENSG00000137842	TMEM62	chr15	+	0.0315224	0.57534	-0.126
ENSG00000143624	INTS3	chr1	+	0.0319617	0.582325	-0.406
ENSG00000102181	CD99L2	chrX	-	0.0323608	0.58747	0.133
ENSG00000115355	CCDC88A	chr2	-	0.0325059	0.588432	0.188
ENSG00000139146	FAM60A	chr12	-	0.0325119	0.588432	-0.179
ENSG00000154845	PPP4R1	chr18	-	0.0325255	0.588432	0.147
ENSG00000214078	CPNE1	chr20	-	0.0327163	0.590845	-0.203
ENSG00000101040	ZMYND8	chr20	-	0.0328311	0.591879	-0.254
ENSG00000110324	IL10RA	chr11	+	0.033021	0.594782	-0.235
ENSG00000177045	SIX5	chr19	-	0.0332557	0.596349	-0.404
ENSG00000048740	CELF2	chr10	+	0.0332597	0.596349	-0.1
ENSG00000072682	P4HA2	chr5	-	0.0340383	0.605769	-0.109
ENSG00000160439	RDH13	chr19	-	0.0340429	0.605769	0.299
ENSG00000139323	POC1B	chr12	-	0.034485	0.611645	0.241
ENSG00000168827	GFM1	chr3	+	0.0344916	0.611645	0.116
ENSG00000104907	TRMT1	chr19	-	0.0344964	0.611645	0.284
ENSG00000144381	HSPD1	chr2	-	0.0345332	0.611645	0.11
ENSG00000083097	DOPEY1	chr6	+	0.0352556	0.621747	-0.165
ENSG00000143549	TPM3	chr1	-	0.0352902	0.621747	-0.123
ENSG00000089682	RBM41	chrX	-	0.0353032	0.621747	0.119
ENSG00000223745	RP4-717I23.3	chr1	-	0.0355789	0.62529	0.223
ENSG00000175792	RUVBL1	chr3	-	0.0357012	0.626613	0.332
ENSG00000111237	VPS29	chr12	-	0.0357596	0.627103	-0.126
ENSG00000160691	SHC1	chr1	-	0.0358433	0.628035	0.12
ENSG00000242588	RP11-274B21.1	chr7	+	0.0359065	0.628109	-0.174
ENSG00000213186	TRIM59	chr3	-	0.0359792	0.628811	-0.328
ENSG00000180900	SCRIB	chr8	-	0.0364404	0.633644	0.143
ENSG00000144381	HSPD1	chr2	-	0.0365003	0.63415	0.102
ENSG00000145687	SSBP2	chr5	-	0.036863	0.639912	-0.116
ENSG00000142621	FHAD1	chr1	+	0.0369991	0.641733	-0.195
ENSG00000111144	LTA4H	chr12	-	0.0371414	0.643659	-0.221
ENSG00000093183	SEC22C	chr3	-	0.0373018	0.644271	-0.164
ENSG00000070814	TCOF1	chr5	+	0.0373684	0.644878	0.123
ENSG00000197043	ANXA6	chr5	-	0.0375052	0.646156	-0.312
ENSG00000249859	PVT1	chr8	+	0.0376902	0.648258	0.181
ENSG00000183386	FHL3	chr1	-	0.0377435	0.648635	0.123
ENSG00000085365	SCAMP1	chr5	+	0.0378215	0.649432	0.215
ENSG00000135870	RC3H1	chr1	-	0.0379601	0.651268	-0.108
ENSG00000010322	NISCH	chr3	+	0.0381047	0.652586	0.209
ENSG00000140479	PCSK6	chr15	-	0.038132	0.652586	0.173
ENSG00000007392	LUC7L	chr16	-	0.038192	0.653071	0.217
ENSG00000249898	CTD-2541M15.1	chr8	-	0.0387147	0.658989	0.31
ENSG00000123600	METTL8	chr2	-	0.0387875	0.659419	0.268
ENSG00000149657	LSM14B	chr20	+	0.0389198	0.661123	0.279
ENSG00000072803	FBXW11	chr5	-	0.0393688	0.666245	0.152
ENSG00000163682	RPL9	chr4	-	0.0393734	0.666245	0.47
ENSG00000234171	AC108488.3	chr2	+	0.0393831	0.666245	0.146
ENSG00000111711	GOLT1B	chr12	+	0.0397357	0.670557	-0.352
ENSG00000108021	FAM208B	chr10	+	0.0401047	0.674789	-0.139
ENSG00000125319	C17orf53	chr17	+	0.0405282	0.680231	-0.266
ENSG00000174446	SNAPC5	chr15	-	0.0406639	0.681749	-0.203
ENSG00000160271	RALGDS	chr9	-	0.0407999	0.682688	-0.366
ENSG00000135870	RC3H1	chr1	-	0.0409506	0.684327	-0.101
ENSG00000122483	CCDC18	chr1	+	0.0411781	0.687013	-0.352
ENSG00000249069	RP11-461C13.1	chr5	+	0.0412397	0.687485	-0.365
ENSG00000152348	ATG10	chr5	+	0.0413413	0.68862	0.103
ENSG00000166579	NDEL1	chr17	+	0.0415314	0.69067	0.242
ENSG00000156787	WDR67	chr8	+	0.0417822	0.69428	-0.152
ENSG00000137818	RPLP1	chr15	+	0.0420172	0.696498	-0.391
ENSG00000141068	KSR1	chr17	+	0.0422985	0.699472	0.313
ENSG00000163697	APBB2	chr4	-	0.0423839	0.69976	-0.262
ENSG00000015479	MATR3	chr5	+	0.0424433	0.700179	0.3
ENSG00000163681	SLMAP	chr3	+	0.0426127	0.701848	0.488
ENSG00000091136	LAMB1	chr7	-	0.0429067	0.706125	0.115
ENSG00000070081	NUCB2	chr11	+	0.0431627	0.70864	0.276
ENSG00000157881	PANK4	chr1	-	0.0432372	0.709052	-0.333
ENSG00000151445	VIPAS39	chr14	-	0.0432567	0.709052	-0.201
ENSG00000160961	ZNF333	chr19	+	0.0433996	0.710295	-0.502
ENSG00000143373	ZNF687	chr1	+	0.0435274	0.711788	0.452
ENSG00000114346	ECT2	chr3	+	0.0436373	0.71189	0.433
ENSG00000093183	SEC22C	chr3	-	0.0437511	0.71256	-0.155
ENSG00000205309	NT5M	chr17	+	0.0440569	0.715313	-0.258
ENSG00000164654	MIOS	chr7	+	0.0440903	0.715313	-0.267
ENSG00000172965	AC068491.1	chr2	-	0.0441675	0.715437	-0.1
ENSG00000213931	HBE1	chr11	-	0.0444009	0.718652	-0.166
ENSG00000254101	RP11-30J20.1	chr8	+	0.0446234	0.720078	-0.309
ENSG00000144554	FANCD2	chr3	+	0.0446941	0.720078	-0.193
ENSG00000181626	ANKRD62	chr18	+	0.0447839	0.720078	-0.273
ENSG00000167196	FBXO22	chr15	+	0.0448023	0.720078	0.103
ENSG00000185246	PRPF39	chr14	+	0.0451291	0.721904	0.262
ENSG00000107521	HPS1	chr10	-	0.0452144	0.721904	-0.16
ENSG00000104164	BLOC1S6	chr15	+	0.045233	0.721904	-0.159
ENSG00000186522	SEPT10	chr2	-	0.0455084	0.724199	-0.126
ENSG00000170322	NFRKB	chr11	-	0.045604	0.724485	-0.467
ENSG00000158161	EYA3	chr1	-	0.0458277	0.725786	-0.114
ENSG00000254840	RP11-574M7.1	chr11	+	0.0458488	0.725786	0.398
ENSG00000128607	KLHDC10	chr7	+	0.045864	0.725786	0.124
ENSG00000143258	USP21	chr1	+	0.0461162	0.72762	-0.204
ENSG00000111696	NT5DC3	chr12	-	0.0462039	0.727809	0.17
ENSG00000079393	DUSP13	chr10	-	0.0462881	0.728029	0.206
ENSG00000104164	BLOC1S6	chr15	+	0.046324	0.728029	-0.152
ENSG00000156990	RPUSD3	chr3	-	0.0463942	0.728577	0.113
ENSG00000143228	NUF2	chr1	+	0.0467073	0.732376	0.13
ENSG00000086666	ZFAND6	chr15	+	0.0468038	0.732774	0.333
ENSG00000232995	RP11-267N12.3	chr1	-	0.046929	0.734175	0.333
ENSG00000184182	UBE2F	chr2	+	0.0472439	0.737666	0.663
ENSG00000153914	SREK1	chr5	+	0.0472597	0.737666	-0.125
ENSG00000168904	LRRC28	chr15	+	0.0473305	0.738212	-0.281
ENSG00000167700	MFSD3	chr8	+	0.0475481	0.740485	-0.225
ENSG00000067365	METTL22	chr16	+	0.0478642	0.743719	-0.16
ENSG00000136521	NDUFB5	chr3	+	0.0482855	0.748008	0.123
ENSG00000180178	AC018865.8	chr2	-	0.0483736	0.748238	0.352
ENSG00000135164	DMTF1	chr7	+	0.0484372	0.748238	-0.209
ENSG00000111300	NAA25	chr12	-	0.0484457	0.748238	-0.108
ENSG00000119912	IDE	chr10	-	0.0485973	0.750015	0.136
ENSG00000131503	ANKHD1	chr5	+	0.0486603	0.750426	0.151
ENSG00000181355	OFCC1	chr6	-	0.0487116	0.750654	-0.413
ENSG00000100796	SMEK1	chr14	-	0.0488225	0.750818	0.374
ENSG00000157911	PEX10	chr1	-	0.04883	0.750818	0.3
ENSG00000134779	TPGS2	chr18	-	0.0488316	0.750818	0.348
ENSG00000139218	SCAF11	chr12	-	0.0491972	0.753518	-0.107
ENSG00000028310	BRD9	chr5	-	0.0492202	0.753518	0.235
ENSG00000171302	CANT1	chr17	-	0.0492204	0.753518	-0.122
ENSG00000144362	PHOSPHO2	chr2	+	0.0496455	0.756917	-0.164
ENSG00000051341	POLQ	chr3	-	0.0497166	0.757075	-0.136
ENSG00000205309	NT5M	chr17	+	0.0498194	0.758079	-0.239
ENSG00000198382	UVRAG	chr11	+	0.049919	0.759034	0.103
ENSG00000152683	SLC30A6	chr2	+	0.0499715	0.759272	-0.201
